# Supplementary material for: Organohalide-catalyzed dehydrative O-alkylation between alcohols: a facile etherification method for aliphatic ether synthesis
Source: Royal Society of Chemistry journal article supplement (doi:10.1039/c5gc00284b), 2015-01-01
Supplement: c5gc00284b1.pdf [file c5gc00284b1.pdf]

Electronic Supplementary Information

# Organohalides-Catalyzed Dehydrative O-Alkylation between Alcohols: A Facile Etherification Method for Aliphatic Ether Synthesis

Qing Xu,<sup>\*a,b</sup> Huamei Xie,<sup>‡a</sup> Pingliang Chen,<sup>‡a</sup> Lei Yu,<sup>a,b</sup> Jianhui Chen,<sup>a</sup> and Xingen Hu<sup>\*a</sup>

<sup>a</sup> College of Chemistry and Materials Engineering, Wenzhou University, Wenzhou, Zhejiang 325035 (China)

<sup>b</sup> Jiangsu Co-Innovation Center for Prevention and Control of Important Animal Infectious Diseases and Zoonoses, Yangzhou University, Yangzhou, Jiangsu 225009 (China)

<sup>‡</sup> These authors contributed equally to this work.

Email: [qing-xu@wzu.edu.cn](mailto:qing-xu@wzu.edu.cn); [hxgwzu@126.com](mailto:hxgwzu@126.com)

## Table of Contents

|                                                                                                              |     |
|--------------------------------------------------------------------------------------------------------------|-----|
| <b>Detailed Condition Screening Tables and Detailed Summary Tables of the Etherification Reactions</b> ..... | S2  |
| <b>Experimental</b> .....                                                                                    | S8  |
| <b>Characterization of the Products</b> .....                                                                | S8  |
| <b>Mechanistic Studies</b> .....                                                                             | S24 |
| <b><sup>1</sup>H and <sup>13</sup>C NMR of the products</b> .....                                            | S32 |

## Detailed Condition Screening Tables and Detailed Summary Tables of the Etherification Reactions

**Table S1.** Detailed Condition Screening and Optimization for Benzyl Halide-Catalyzed O-Alkylative Homo-Etherification Reaction of Benzyl Alcohol.<sup>a</sup>

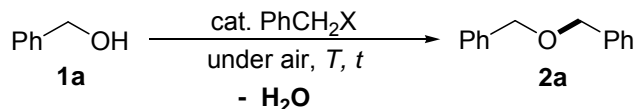

| run               | cat. (mol%), additive (mol%)                                | T (°C)     | t (h)     | yield% <sup>b</sup> |
|-------------------|-------------------------------------------------------------|------------|-----------|---------------------|
| 1                 | -                                                           | 120        | 24        | 0                   |
| 2                 | PhCH <sub>2</sub> Br (1)                                    | 120        | 24        | 41                  |
| 3                 | PhCH <sub>2</sub> Br (10)                                   | 30         | 8         | 0                   |
| 4                 | PhCH <sub>2</sub> Br (10)                                   | 60         | 8         | 3                   |
| 5                 | PhCH <sub>2</sub> Br (10)                                   | 100        | 8         | 20                  |
| 6                 | PhCH <sub>2</sub> Br (10)                                   | 120        | 8         | 38                  |
| 7                 | <b>PhCH<sub>2</sub>Br (10)</b>                              | <b>120</b> | <b>24</b> | <b>&gt;99 (97)</b>  |
| 8                 | PhCH <sub>2</sub> Br (5)                                    | 120        | 24        | 71                  |
| 9                 | PhCH <sub>2</sub> Br (8)                                    | 120        | 24        | 81                  |
| 10                | PhCH <sub>2</sub> Cl (10)                                   | 120        | 24        | 18                  |
| 11 <sup>c,d</sup> | PhCH <sub>2</sub> Br (10), DBU (10), toluene                | 120        | 24        | 0                   |
| 12 <sup>c,d</sup> | PhCH <sub>2</sub> Br (10), NaHCO <sub>3</sub> (10), toluene | 120        | 24        | <5                  |
| 13 <sup>d</sup>   | PhCH <sub>2</sub> Br (10)                                   | 120        | 24        | (93)                |
| 14 <sup>c,d</sup> | PhCH <sub>2</sub> Br (10), toluene                          | 120        | 24        | (51)                |
| 15 <sup>c,e</sup> | HBr (10), toluene                                           | 120        | 24        | (57)                |
| 16 <sup>e</sup>   | HBr                                                         | 120        | 24        | (60)                |
| 17                | NaBr (10 mol%), H <sub>2</sub> SO <sub>4</sub> (10-15 mol%) | 120        | 24        | (9)                 |
| 18                | NaBr (10 mol%), H <sub>3</sub> PO <sub>4</sub> (10-15 mol%) | 120        | 24        | (17)                |

<sup>a</sup> Unless otherwise noted, the neat mixture of PhCH<sub>2</sub>OH **1a** (10 mmol) and different loadings of catalyst PhCH<sub>2</sub>X was directly sealed under air in a Schlenk tube (20 mL). The reaction was then heated and monitored by GC-MS and TLC analysis. <sup>b</sup> GC yields (isolated yields in parenthesis) based on **1a**. <sup>c</sup> The reactions used 4 mmol **1a** and 0.5 mL dry toluene (dried over CaH<sub>2</sub> by heating, redistilled under vacuum, and then collected and stored in a sealed Schlenk flask under nitrogen). <sup>d</sup> Using 10 mol% dry PhCH<sub>2</sub>Br (dried over CaCl<sub>2</sub> by heating, redistilled under vacuum, and then collected and stored in a sealed Schlenk flask under nitrogen). <sup>e</sup> HBr (33 wt% in acetic acid) was used.

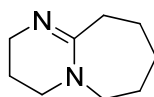

DBU: 1,8-Diazabicyclo[5,4,0]-undec-7-ene



**Table S3.** Diphenylmethyl Bromide-Catalyzed O-Alkylative Cross-Etherification of Alcohols with Diphenylmethanol for Unsymmetrical Dialkyl Ether Synthesis.<sup>a</sup>

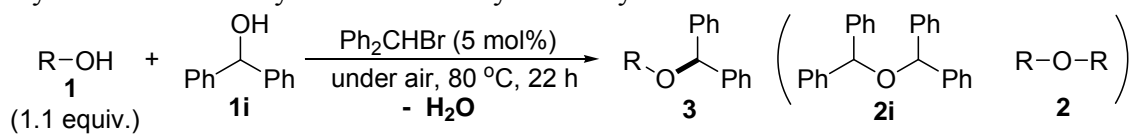

| run | ROH                                                                                            | conditions <sup>a</sup>                      | <b>3</b> : <b>2i</b> : <b>2</b> <sup>b</sup> | <b>3</b> : yield% <sup>c</sup> |
|-----|------------------------------------------------------------------------------------------------|----------------------------------------------|----------------------------------------------|--------------------------------|
| 1   | PhCH <sub>2</sub> OH                                                                           | 80 °C, 22 h                                  | 96:4:0                                       | <b>3a</b> : 96 (90)            |
| 2   |                                                                                                | 100 °C, 22 h                                 | 94:6:0                                       | <b>3a</b> : 94 (86)            |
| 3   |                                                                                                | Ph <sub>2</sub> CHCl (5 mol%)<br>80 °C, 22 h | 81:5:0 <sup>d</sup>                          | <b>3a</b> : 81 (75)            |
| 4   |                                                                                                | PhCH <sub>2</sub> Br (5 mol%)<br>80 °C, 22 h | 93:6:1                                       | <b>3a</b> : 93 (84)            |
| 5   | 4-MeC <sub>6</sub> H <sub>4</sub> CH <sub>2</sub> OH                                           | 80 °C, 22 h                                  | 95:5:0                                       | <b>3b</b> : 95 (90)            |
| 6   | 4-FC <sub>6</sub> H <sub>4</sub> CH <sub>2</sub> OH                                            | 80 °C, 22 h                                  | 94:6:0                                       | <b>3c</b> : 94 (90)            |
| 7   | 4-ClC <sub>6</sub> H <sub>4</sub> CH <sub>2</sub> OH                                           | 80 °C, 22 h                                  | 95:5:0                                       | <b>3d</b> : 95 (92)            |
| 8   | 4-BrC <sub>6</sub> H <sub>4</sub> CH <sub>2</sub> OH                                           | 80 °C, 22 h                                  | 95:5:0                                       | <b>3e</b> : 95 (91)            |
| 9   | 4-NO <sub>2</sub> C <sub>6</sub> H <sub>4</sub> CH <sub>2</sub> OH                             | 80 °C, 22 h                                  | 96:4:0                                       | <b>3f</b> : 96 (94)            |
| 10  | CH <sub>3</sub> CH <sub>2</sub> OH                                                             | 73 °C, 22 h                                  | 95:5:0                                       | <b>3g</b> : 95 (94)            |
| 11  | <i>n</i> -C <sub>4</sub> H <sub>9</sub> OH                                                     | 80 °C, 22 h                                  | 96:4:0                                       | <b>3h</b> : 96 (93)            |
| 12  | <i>n</i> -C <sub>5</sub> H <sub>11</sub> OH                                                    | 80 °C, 22 h                                  | 97:3:0                                       | <b>3i</b> : 97 (92)            |
| 13  | <i>n</i> -C <sub>6</sub> H <sub>13</sub> OH                                                    | 80 °C, 22 h                                  | 96:4:0                                       | <b>3j</b> : 96 (94)            |
| 14  | <i>n</i> -C <sub>7</sub> H <sub>15</sub> OH                                                    | 80 °C, 22 h                                  | 93:7:0                                       | <b>3k</b> : 93 (92)            |
| 15  | <i>n</i> -C <sub>8</sub> H <sub>17</sub> OH                                                    | 80 °C, 22 h                                  | 93:7:0                                       | <b>3l</b> : 93 (91)            |
| 16  | Ph(CH <sub>2</sub> ) <sub>2</sub> OH                                                           | 80 °C, 22 h                                  | 97:3:0                                       | <b>3m</b> : 97 (96)            |
| 17  | Ph(CH <sub>2</sub> ) <sub>3</sub> OH                                                           | 80 °C, 22 h                                  | 96:4:0                                       | <b>3n</b> : 96 (94)            |
| 18  |  (3 equiv.) | 80 °C, 22 h                                  | 90:10:0                                      | <b>3o</b> : 90 (80)            |
| 19  |             | 80 °C, 22 h<br>(1 equiv. <b>1k</b> )         | 81:19:0                                      | <b>3p</b> : 81                 |
| 21  |                                                                                                | 80 °C, 22 h<br>(3 equiv. <b>1k</b> )         | 95:5:0                                       | <b>3p</b> : 95 (92)            |
| 22  |                                                                                                | 80 °C, 22 h<br>(5 equiv. <b>1k</b> )         | 97:3:0                                       | <b>3p</b> : 97                 |
| 23  |  (3 equiv.) | 80 °C, 22 h                                  | 97:3:0                                       | <b>3q</b> : 97 (91)            |
| 24  | Ph-CH=CH-CH <sub>2</sub> OH                                                                    | 80 °C, 22 h                                  | 75:25:0                                      | <b>3r</b> : 75 (64)            |

<sup>a</sup> Unless otherwise noted, the neat mixture of ROH (5.5 mmol, 1.1 equiv.), Ph<sub>2</sub>CHOH **1i** (5 mmol), and Ph<sub>2</sub>CHBr (5 mol%) was directly sealed under air in a Schlenk tube (20 mL). The reaction was then heated and monitored by GC-MS and TLC analysis. <sup>b</sup> Product ratios determined by GC-MS analysis. <sup>c</sup> GC yields (isolated yields in parenthesis) based on the less-used alcohols. <sup>d</sup> Unidentified byproducts were observed.

**Table S4.** 1-Phenylethyl Bromide-Catalyzed O-Alkylative Cross-Etherification of Alcohols with 1-Phenylethanol for Unsymmetrical Dialkyl Ether Synthesis.<sup>a</sup>

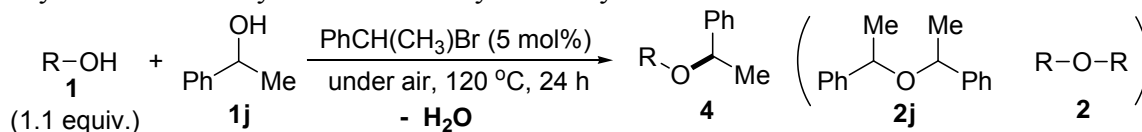

| run | ROH                                                                                            | conditions <sup>a</sup> | <b>4</b> : <b>2j</b> : <b>2</b> <sup>b</sup> | <b>4</b> : yield% <sup>c</sup> |
|-----|------------------------------------------------------------------------------------------------|-------------------------|----------------------------------------------|--------------------------------|
| 1   | PhCH <sub>2</sub> OH                                                                           | 60 °C, 24 h             | 66:34:0                                      | <b>4a</b> : 66 (50)            |
| 2   |                                                                                                | 90 °C, 24 h             | 71:29:0                                      | <b>4a</b> : 71 (64)            |
| 3   |                                                                                                | 120 °C, 24 h            | 94:6:0                                       | <b>4a</b> : 94 (81)            |
| 4   | 4-MeC <sub>6</sub> H <sub>4</sub> CH <sub>2</sub> OH                                           | 120 °C, 24 h            | 70:19:11                                     | <b>4b</b> : 70 (66)            |
| 5   | 4-FC <sub>6</sub> H <sub>4</sub> CH <sub>2</sub> OH                                            | 120 °C, 24 h            | 82:18:0                                      | <b>4c</b> : 82 (66)            |
| 6   | 4-ClC <sub>6</sub> H <sub>4</sub> CH <sub>2</sub> OH                                           | 120 °C, 24 h            | 82:18:0                                      | <b>4d</b> : 82 (66)            |
| 7   | 4-BrC <sub>6</sub> H <sub>4</sub> CH <sub>2</sub> OH                                           | 120 °C, 24 h            | 87:13:0                                      | <b>4e</b> : 87 (66)            |
| 8   | 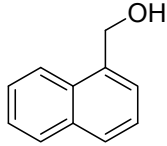              | 120 °C, 24 h            | 81:19:0                                      | <b>4f</b> : 81 (67)            |
| 9   | C <sub>2</sub> H <sub>5</sub> OH                                                               | 120 °C, 24 h            | 87:0:0 <sup>d</sup>                          | <b>4g</b> : 87 (76)            |
| 10  | <i>n</i> -C <sub>5</sub> H <sub>11</sub> OH                                                    | 120 °C, 24 h            | 85:15:0                                      | <b>4h</b> : 85 (83)            |
| 11  | <i>n</i> -C <sub>6</sub> H <sub>13</sub> OH                                                    | 120 °C, 24 h            | 92:8:0                                       | <b>4i</b> : 92 (86)            |
| 12  | <i>n</i> -C <sub>7</sub> H <sub>15</sub> OH                                                    | 120 °C, 24 h            | >99:0:0                                      | <b>4j</b> : >99 (82)           |
| 13  | Ph(CH <sub>2</sub> ) <sub>2</sub> OH                                                           | 120 °C, 24 h            | >99:0:0                                      | <b>4k</b> : >99 (80)           |
| 14  | Ph(CH <sub>2</sub> ) <sub>3</sub> OH                                                           | 120 °C, 24 h            | 95:5:0                                       | <b>4l</b> : 95 (75)            |
| 15  |  (3 equiv.) | 120 °C, 38 h            | 82:0:0 <sup>d</sup>                          | <b>4m</b> : 82 (66)            |
| 16  |  (3 equiv.) | 120 °C, 38 h            | 71:8:0 <sup>d</sup>                          | <b>4n</b> : 71 (52)            |

<sup>a</sup> Unless otherwise noted, the neat mixture of ROH (5.5 mmol, 1.1 equiv.), PhCH(CH<sub>3</sub>)OH **2j** (5 mmol), and PhCH(CH<sub>3</sub>)Br (5 mol%) was directly sealed under air in a Schlenk tube (20 mL). The reaction was then heated and monitored by GC-MS and TLC analysis. <sup>b</sup> Product ratios determined by GC-MS analysis. <sup>c</sup> GC yields (isolated yields in parenthesis) based on the less alcohols. <sup>d</sup> Unidentified byproducts were observed.



**Table S7.** *t*-Butyl Bromide-Catalyzed O-Alkylative Cross-Etherification of Alcohols with *t*-Butyl Alcohol for Unsymmetrical Dialkyl Ether Synthesis.<sup>a</sup>

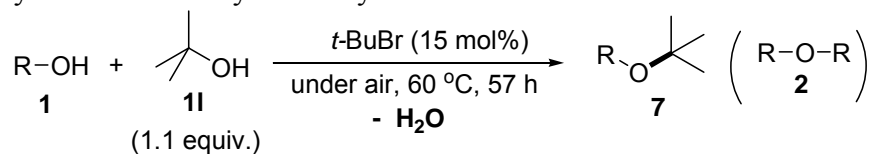

| run | ROH                                         | <i>T</i> , <i>t</i> | <b>7</b> : <b>2</b> <sup>b</sup> | <b>7</b> : yield% <sup>c</sup>   |
|-----|---------------------------------------------|---------------------|----------------------------------|----------------------------------|
| 1   | PhCH <sub>2</sub> OH                        | 60 °C, 32 h         | 100:0                            | <b>7a</b> : 55 <sup>d</sup>      |
| 2   |                                             | 60 °C, 57 h         | 100:0                            | <b>7a</b> : 64 (57) <sup>d</sup> |
| 3   | <i>n</i> -C <sub>7</sub> H <sub>15</sub> OH | 60 °C, 32 h         | 100:0                            | <b>7b</b> : 77 <sup>d</sup>      |
| 4   |                                             | 60 °C, 57 h         | 100:0                            | <b>7b</b> : 82 (63) <sup>d</sup> |

<sup>a</sup> The neat mixture of ROH **1** (5 mmol), *t*-BuOH (5.5 mmol, 1.1 equiv.), and *t*-BuBr (15 mol%) was directly sealed under air in a Schlenk tube (20 mL). The reaction was then heated and monitored by GC-MS and TLC analysis. <sup>b</sup> Product ratios determined by GC-MS analysis. <sup>c</sup> GC yields (isolated yields in parenthesis) based on **1**. <sup>d</sup> Reactions incomplete.

## Experimental

**General.** Unless otherwise noted, alcohols, organohalides, and other reagents used in the work including (*S*)-PhCH(CH<sub>3</sub>)OH ((*S*)-**1j**, 98% *ee*) were all purchased and used without further purification. Except the large scale reaction, all the reactions were directly sealed under air in a 20 mL Schlenk tube and then heated and monitored by TLC and/or GC-MS. Dry PhCH<sub>2</sub>Br was obtained by a standard procedure: firstly dried over CaCl<sub>2</sub> by heating, and then redistilled under vacuum and collected and stored in a sealed Schlenk flask under nitrogen. Dry toluene was obtained similarly: firstly dried over CaH<sub>2</sub> by heating, and then redistilled under vacuum and collected and stored in a sealed Schlenk flask under nitrogen. The products were purified by column chromatography on silica gel using petroleum ether and ethyl acetate as the eluent. <sup>1</sup>H and <sup>13</sup>C NMR spectra were recorded on a Bruker Avance III AV500 instrument (500 MHz for <sup>1</sup>H and 125 MHz for <sup>13</sup>C NMR spectroscopy) or a Bruker Avance-1B 300 instrument (300 MHz for <sup>1</sup>H NMR spectroscopy) by using CDCl<sub>3</sub> as the solvent. Chemical shift values for <sup>1</sup>H and <sup>13</sup>C NMR were referred to internal Me<sub>4</sub>Si (0 ppm). Mass spectra were measured on a Shimadzu GCMS-QP2010 Plus or a Shimadzu GCMS-QP2010 Ultra spectrometer (EI). HRMS (ESI) analysis was measured on a Bruker microOTOF-Q II instrument. The optical rotatory power of diastereomers of product **2j** was recorded with an Optical Activity LTD polAAr 3005 automatic Polarimeter.

**Typical Procedure for Organohalides-Catalyzed *O*-Alkylative Homo-Etherification Reaction of Alcohols for the Synthesis of Symmetrical Aliphatic Ethers.** The mixture of benzyl alcohol **1a** (1.04 mL, 10 mmol) and benzyl bromide (0.12 mL, 1.0 mmol, 10 mol%) was sealed under air in a 20 mL Schlenk tube, stirred at 120 °C for 24 h, and then monitored by TLC and/or GC-MS. After completion of the reaction, the mixture was directly purified, without any workup, through a silica gel column using ethyl acetate and petroleum ether as the eluent, giving dibenzyl ether **2a** in 97% isolated yield.

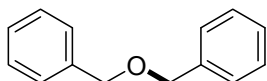

**Dibenzyl ether (2a).** Colorless liquid. <sup>1</sup>H NMR (500 MHz, CDCl<sub>3</sub>): δ 7.39-7.35 (m, 8H), 7.32-7.28 (m, 2H), 4.57 (s, 4H). <sup>13</sup>C NMR (125.4 MHz, CDCl<sub>3</sub>): δ 138.3, 128.4, 127.8, 127.6, 72.1. MS (EI): *m/z* (%) 198 (0.02, M<sup>+</sup>), 107 (14), 92 (100), 91 (81), 79 (15), 77 (13), 65 (17). This compound was known: Jereb, M.; Vražič, D.; Zupan, M. *Tetrahedron Lett.* **2009**, *50*, 2347.

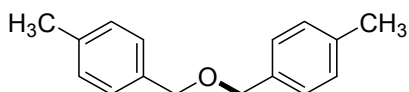



**Bis(*p*-methylphenylmethyl) ether (2b).** Colorless liquid.  $^1\text{H}$  NMR (500 MHz,  $\text{CDCl}_3$ ):  $\delta$  7.25 (d,  $J = 8.0$  Hz, 4H), 7.16 (d,  $J = 8.0$  Hz, 4H), 4.50 (s, 4H), 2.35 (s, 6H).  $^{13}\text{C}$  NMR (125.4 MHz,  $\text{CDCl}_3$ ):  $\delta$  137.2, 135.3, 129.0, 127.9, 71.8, 21.1. MS (EI):  $m/z$  (%) 226 (0.22,  $\text{M}^+$ ), 121 (11), 106 (100), 105 (59), 91 (49), 79 (13), 77 (18). This compound was known: Zhu, Z. L.; Espenson, J. H. *J. Org. Chem.* **1996**, *61*, 324.

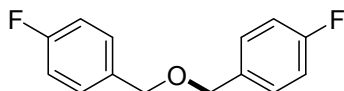

**Bis(*p*-fluorophenylmethyl) ether (2c).** Colorless liquid.  $^1\text{H}$  NMR (500 MHz,  $\text{CDCl}_3$ ):  $\delta$  7.34-7.31 (m, 4H), 7.06-7.03 (m, 4H), 4.51 (s, 4H).  $^{13}\text{C}$  NMR (125.4 MHz,  $\text{CDCl}_3$ ):  $\delta$  162.4 (d,  $J_{\text{C-F}} = 245.0$  Hz), 133.8 (d,  $J_{\text{C-F}} = 3.1$  Hz), 129.5 (d,  $J_{\text{C-F}} = 8.2$  Hz), 115.3 (d,  $J_{\text{C-F}} = 21.3$  Hz), 71.4. MS (EI):  $m/z$  (%) 234 (0.37,  $\text{M}^+$ ), 138 (7), 125 (19), 110 (76), 109 (100), 97 (15), 83 (16). This compound was known: Bach, P.; Albright, A.; Laali, K. K. *Eur. J. Org. Chem.* **2009**, 1961.

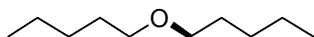

**Dipentyl ether (2d).** Colorless liquid.  $^1\text{H}$  NMR (500 MHz,  $\text{CDCl}_3$ ):  $\delta$  3.39 (t,  $J = 6.8$  Hz, 4H), 1.60-1.55 (m, 4H), 1.33-1.31 (m, 8H), 0.90 (t,  $J = 7.0$  Hz, 6H).  $^{13}\text{C}$  NMR (125.4 MHz,  $\text{CDCl}_3$ ):  $\delta$  71.0, 29.5, 28.4, 22.6, 14.1. MS (EI):  $m/z$  (%) 158 (1.52,  $\text{M}^+$ ), 129 (3), 115 (1), 101 (6), 71 (100), 70 (46), 69 (22), 55 (12). This compound was known: Zhang, Y.-J.; Dayoub, W.; Chen, G.-R. Lemaire, M. *Tetrahedron*, **2012**, *68*, 7400.

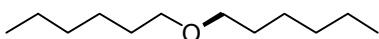

**Diethyl ether (2e).** Colorless liquid.  $^1\text{H}$  NMR (500 MHz,  $\text{CDCl}_3$ ):  $\delta$  3.39 (t,  $J = 6.8$  Hz, 4H), 1.59-1.54 (m, 4H), 1.34-1.29 (m, 12H), 0.89 (t,  $J = 7.0$  Hz, 6H).  $^{13}\text{C}$  NMR (125.4 MHz,  $\text{CDCl}_3$ ):  $\delta$  71.0, 31.7, 29.8, 25.9, 22.6, 14.1. MS (EI):  $m/z$  (%) 186 (0.13,  $\text{M}^+$ ), 115 (2), 103 (5), 85 (100), 69 (16), 57 (23), 56 (41). This compound was known: Makowski, P.; Rothe, R.; Thomas, A.; Niederberger, M.; Goettmann, F. *Green Chem.* **2009**, *11*, 34.

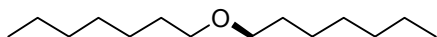

**Diheptyl ether (2f).** Colorless liquid.  $^1\text{H}$  NMR (500 MHz,  $\text{CDCl}_3$ ):  $\delta$  3.39 (t,  $J = 6.8$  Hz, 4H), 1.59-1.54 (m, 4H), 1.30-1.28 (m, 16H), 0.88 (t,  $J = 7.0$  Hz, 6H).  $^{13}\text{C}$  NMR (125.4 MHz,  $\text{CDCl}_3$ ):  $\delta$  71.0, 31.8, 29.8, 29.2, 26.2, 22.6, 14.1. MS (EI):  $m/z$  (%) 214 (0.07,  $\text{M}^+$ ), 99 (13), 98 (13), 97 (15), 70 (29), 57 (100), 56 (15), 55 (14). This compound was known: Zolfigol, M. A.; Mohammadpoor-Baltork, I.; Mirjalili, B. F.; Bamoniri, A. *Synlett*, **2003**, (12), 1877.

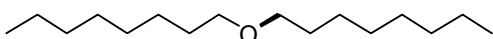

**Dioctyl ether (2g).** Colorless liquid.  $^1\text{H}$  NMR (500 MHz,  $\text{CDCl}_3$ ):  $\delta$  3.39 (t,  $J = 6.8$  Hz, 4H), 1.58-1.54 (m, 4H), 1.30-1.26 (m, 20H), 0.88 (t,  $J = 7.0$  Hz, 6H).  $^{13}\text{C}$  NMR (125.4 MHz,  $\text{CDCl}_3$ ):  $\delta$

71.0, 31.8, 29.8, 29.5, 29.3, 26.2, 22.7, 14.1. MS (EI):  $m/z$  (%) 242 (0.05,  $M^+$ ), 112 (17), 84 (34), 71 (100), 69 (36), 57 (94). This compound was known: Zolfigol, M. A.; Mohammadpoor-Baltork, I.; Habibi, D.; Mirjalili, B. F.; Bamoniri, A. *Tetrahedron Lett.* **2003**, *44*, 8165.

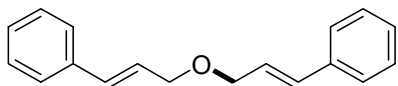

**Dicinnamyl ether (2h).** Colorless liquid.  $^1\text{H}$  NMR (500 MHz,  $\text{CDCl}_3$ ):  $\delta$  7.39 (d,  $J = 7.5$  Hz, 4H), 7.33-7.29 (m, 4H), 7.25-7.22 (m, 2H), 6.63 (d,  $J = 16.0$  Hz, 2H), 6.32 (dt,  $J = 6.0$  Hz,  $J = 16.0$  Hz, 2H), 4.20 (dd,  $J = 1.5$  Hz,  $J = 6.0$  Hz, 4H).  $^{13}\text{C}$  NMR (125.4 MHz,  $\text{CDCl}_3$ ):  $\delta$  136.7, 132.5, 128.5, 127.6, 126.5, 126.0, 70.7. MS (EI):  $m/z$  (%) 250 (0.01,  $M^+$ ), 155 (13), 154 (100), 153 (39), 152 (27), 76 (10). This compound was known: Kayaki, Y.; Koda, T.; Ikariya, T. *J. Org. Chem.* **2004**, *69*, 2595.

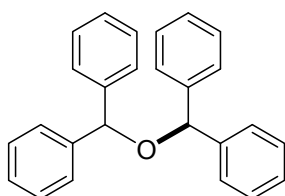

**Bis(diphenylmethyl) ether (2i).** White solid.  $^1\text{H}$  NMR (500 MHz,  $\text{CDCl}_3$ ):  $\delta$  7.36 (d,  $J = 7.5$  Hz 8H), 7.31 (t,  $J = 7.5$  Hz, 8H), 7.25 (t,  $J = 7.0$  Hz, 4H), 5.40 (s, 2H).  $^{13}\text{C}$  NMR (125.4 MHz,  $\text{CDCl}_3$ ):  $\delta$  142.2, 128.4, 127.4, 127.2, 80.0. MS (EI):  $m/z$  (%) 350 (0.38,  $M^+$ ), 207 (15), 183 (64), 168 (69), 165 (42), 152 (22), 106 (36), 105 (76), 91 (25), 77 (22). This compound was known: Le Bras, J.; Muzart, J. *Tetrahedron*, **2007**, *63*, 7942.

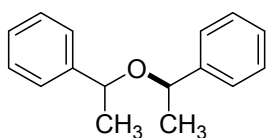

(*RR/SS/RS/SR* ~1/1/1/1 mixtures)

**Bis(1-phenylethyl) ether (2j).** Colorless liquid. The NMR spectra are of a 50/50 mixture of dl and meso isomers.  $^1\text{H}$  NMR (500 MHz,  $\text{CDCl}_3$ ):  $\delta$  7.39-7.29 (m, 10+10H), 4.55 (q,  $J = 6.5$  Hz, 1+1H), 4.26 (q,  $J = 6.5$  Hz, 1+1H), 1.48 (d,  $J = 6.5$  Hz, 3+3H), 1.40 (d,  $J = 6.5$  Hz, 3+3H).  $^{13}\text{C}$  NMR (125.4 MHz,  $\text{CDCl}_3$ ):  $\delta$  144.2 (or 144.1), 128.4 (or 128.2), 127.4 (or 127.1), 126.3 (or 126.2), 74.6 (or 74.4), 24.7 (or 23.0). MS (EI):  $m/z$  (%) 226 (0.01,  $M^+$ ), 121 (23), 106 (28), 105 (100), 91 (7), 79 (10), 77 (12). The above characterizations of **2j** are in agreement with the literature data: (a) Yu, J.-J.; Wang, L.-M.; Guo, F.-L.; Liu, J.-Q.; Liu, Y.; Jiao, N. *Synth. Commun.* **2011**, *41*, 1609. (b) Noji, M.; Ohno, T.; Fuji, K.; Futaba, N.; Tajima, H.; Ishii, K. *J. Org. Chem.* **2003**, *68*, 9340.

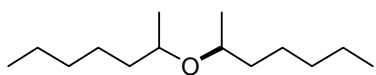

(*RR/SS/RS/SR* ~1/1/1/1 mixtures)

**Bis(2-heptyl) ether (2k).** Colorless liquid. The NMR spectra are of a 50/50 mixture of dl and meso isomers.  $^1\text{H}$  NMR (500 MHz,  $\text{CDCl}_3$ ):  $\delta$  3.44-3.37 (m, 2+2H), 1.50-1.46 (m, 2+2H), 1.39-1.28 (m, 14+14H), 1.12-1.09 (m, 6+6H), 0.90-0.87 (m, 6+6H).  $^{13}\text{C}$  NMR (125.4 MHz,  $\text{CDCl}_3$ ):  $\delta$  73.4 (or 73.0), 37.5 (or 37.2), 32.1 (or 32.0), 25.5 (or 25.4), 22.7, 21.1 (or 20.5), 14.09 (or 14.07). MS (EI):  $m/z$  (%) 214 (0.11,  $\text{M}^+$ ), 143 (31), 125 (11), 99 (58), 57 (100), 55 (12). This compound was known: Adams, J. M.; Ballantine, J. A.; Graham, S. H.; Laub, R. J.; Purnell, J. H.; Reid, Paul, I.; Shaman, W. Y. M.; Thomas, J. M. *Angew. Chem.* **1978**, *90*, 290.

**Typical Procedure for  $\text{Ph}_2\text{CHBr}$ -Catalyzed *O*-Alkylative Cross-Etherification Reaction of Benzhydrol with Alcohols for Synthesis of Unsymmetrical Aliphatic Ethers.** The mixture of benzhydrol **1i** (0.921 g, 5 mmol), benzyl alcohol **1a** (0.57 mL, 5.5 mmol, 1.1 equiv.) and diphenylmethyl bromide (0.0618 g, 0.25 mmol, 5 mol%) was sealed under air in a 20 mL Schlenk tube, stirred at 80 °C for 22 h, and then monitored by TLC and/or GC-MS. After completion of the reaction, the mixture was directly purified, without any workup, through a silica gel column using ethyl acetate and petroleum ether as the eluent, giving benzyl diphenylmethyl ether **3a** in 90% isolated yield.

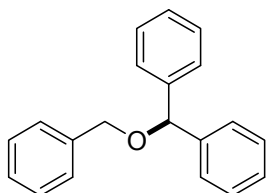

**Benzyl diphenylmethyl ether (3a).** Colorless liquid.  $^1\text{H}$  NMR (500 MHz,  $\text{CDCl}_3$ ):  $\delta$  7.36-7.17 (m, 15H), 5.43 (s, 1H), 4.53 (s, 2H).  $^{13}\text{C}$  NMR (125.4 MHz,  $\text{CDCl}_3$ ):  $\delta$  142.2, 138.5, 128.5, 128.4, 127.8, 127.6, 127.5, 127.2, 82.6, 70.6. MS (EI):  $m/z$  (%) 274 (0.02,  $\text{M}^+$ ), 183 (100), 168 (49), 167 (83), 165 (38), 152 (24), 105 (64), 92 (31), 91 (95), 77 (27). This compound was known: Stanescu, M. A.; Varma, R. S. *Tetrahedron Lett.* **2002**, *43*, 7307.

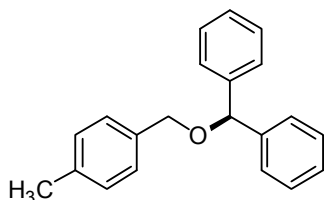

**(*p*-Methylphenyl)methyl diphenylmethyl ether (3b).** White solid.  $^1\text{H}$  NMR (500 MHz,  $\text{CDCl}_3$ ):  $\delta$  7.38-7.36 (m, 4H), 7.33-7.30 (m, 4H), 7.26-7.21 (m, 4H), 7.15 (d,  $J = 7.5$  Hz, 2H), 5.43 (s, 1H), 4.50 (s, 2H), 2.34 (s, 3H).  $^{13}\text{C}$  NMR (125.4 MHz,  $\text{CDCl}_3$ ):  $\delta$  142.2, 137.2, 135.3, 129.0, 128.3, 127.8, 127.4, 127.1, 82.2, 70.3, 21.2. MS (EI):  $m/z$  (%) 288 (0.20,  $\text{M}^+$ ), 183 (63), 168 (68), 167 (100), 165

(42), 152 (22), 106 (37), 105 (76), 91 (25). HRMS Calcd for C<sub>21</sub>H<sub>20</sub>NaO (M+Na): 311.1406; found: 311.1414.

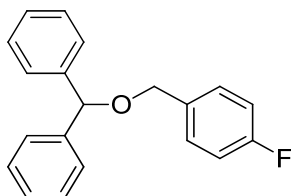

**(*p*-Fluorophenyl)methyl diphenylmethyl ether (3c).** Colorless liquid. <sup>1</sup>H NMR (500 MHz, CDCl<sub>3</sub>): δ 7.39-7.33 (m, 10H), 7.29-7.26 (m, 2H), 7.06-7.02 (m, 2H), 5.44 (s, 1H), 4.51 (s, 2H). <sup>13</sup>C NMR (125.4 MHz, CDCl<sub>3</sub>): δ 162.3 (d, *J*<sub>C-F</sub> = 244.8 Hz), 142.0, 134.1 (d, *J*<sub>C-F</sub> = 3.0 Hz), 129.4 (d, *J*<sub>C-F</sub> = 8.0 Hz), 128.4, 127.5, 127.1, 115.2 (d, *J*<sub>C-F</sub> = 21.3 Hz), 82.5, 69.8. MS (EI): *m/z* (%) 292 (0.15, M<sup>+</sup>), 183 (54), 168 (93), 167 (100), 165 (44), 152 (24), 109 (69), 105 (49), 77 (20). This compound was known: Stanescu, M. A.; Varma, R. S. *Tetrahedron Lett.* **2002**, *43*, 7307.

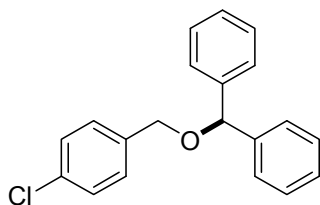

**(*p*-Chlorophenyl)methyl diphenylmethyl ether (3d).** White solid. <sup>1</sup>H NMR (500 MHz, CDCl<sub>3</sub>): δ 7.37-7.23 (m, 14H), 5.41 (s, 1H), 4.48 (s, 2H). <sup>13</sup>C NMR (125.4 MHz, CDCl<sub>3</sub>): δ 141.9, 136.9, 133.2, 129.0, 128.5, 128.4, 127.5, 127.0, 82.6, 69.7. MS (EI): *m/z* (%) 309 (M+1), 308 (0.03, M<sup>+</sup>), 183 (62), 168 (86), 167 (100), 165 (40), 152 (21), 125 (40), 105 (42), 89 (10), 77 (19). This compound was known: Stanescu, M. A.; Varma, R. S. *Tetrahedron Lett.* **2002**, *43*, 7307.

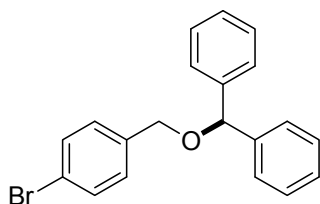

**(*p*-Bromophenyl)methyl diphenylmethyl ether (3e).** White solid. <sup>1</sup>H NMR (500 MHz, CDCl<sub>3</sub>): δ 7.48 (d, *J* = 8.5 Hz, 2H), 7.38-7.33 (m, 8H), 7.29-7.24 (m, 4H), 5.43 (s, 1H), 4.50 (s, 2H). <sup>13</sup>C NMR (125.4 MHz, CDCl<sub>3</sub>): δ 141.9, 137.4, 131.5, 129.3, 128.4, 127.6, 127.0, 121.4, 82.7, 69.8. MS (EI): *m/z* (%) 353 (M+1), 352 (0.05, M<sup>+</sup>), 184 (40), 183 (15), 165 (11), 105 (100), 79 (26), 78 (34), 77 (50), 51 (15). This compound was known: Gharib, A.; Pesyan, N. N.; Jahangir, M.; Roshani, M.; Scheeren, J. W. *Bulg. Chem. Commun.* **2012**, *44*, 11.

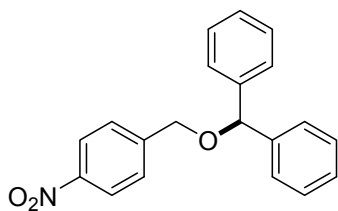

**(*p*-Nitrophenyl)methyl diphenylmethyl ether (3f).** White solid.  $^1\text{H}$  NMR (500 MHz,  $\text{CDCl}_3$ ):  $\delta$  8.19 (d,  $J = 9.0$  Hz, 2H), 7.52 (d,  $J = 8.5$  Hz, 2H), 7.40-7.33 (m, 8H), 7.29-7.23 (m, 2H), 5.47 (s, 1H), 4.62 (s, 2H).  $^{13}\text{C}$  NMR (125.4 MHz,  $\text{CDCl}_3$ ):  $\delta$  147.3, 146.0, 141.5, 128.5, 127.73, 127.67, 126.9, 123.6, 83.4, 69.4. MS (EI):  $m/z$  (%) 319 (0.46,  $\text{M}^+$ ), 206 (12), 183 (71), 168 (61), 167 (100), 165 (47), 152 (26), 136 (19), 106 (37), 104 (74). This compound was known: Cast, J.; Stevens, T. S.; Holmes, J. J. *Chem. Soc.* **1960**, 3521.

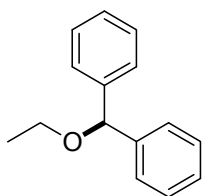

**Ethyl diphenylmethyl ether (3g).** Colorless liquid.  $^1\text{H}$  NMR (500 MHz,  $\text{CDCl}_3$ ):  $\delta$  7.36-7.30 (m, 8H), 7.24-7.22 (m, 2H), 5.36 (s, 1H), 3.52 (q,  $J = 7.0$  Hz, 2H), 1.27 (t,  $J = 7.0$  Hz, 3H).  $^{13}\text{C}$  NMR (125.4 MHz,  $\text{CDCl}_3$ ):  $\delta$  142.5, 128.3, 127.3, 126.9, 83.5, 64.5, 15.3. MS (EI):  $m/z$  (%) 212 (36.26,  $\text{M}^+$ ), 183 (13), 168 (54), 167 (100), 165 (46), 152 (20), 135 (41), 105 (43), 77 (26). This compound was known: Bikard, Y.; Weibel, J.-M.; Sirlin, C.; Dupuis, L.; Loeffler, J.-P.; Pale, P. *Tetrahedron Lett.* **2007**, 48, 8895.

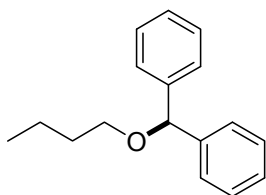

***n*-Butyl diphenylmethyl ether (3h).** Colorless liquid.  $^1\text{H}$  NMR (500 MHz,  $\text{CDCl}_3$ )  $\delta$  7.37-7.30 (m, 8H), 7.26-7.23 (m, 2H), 5.34 (s, 1H), 3.46 (t,  $J = 6.5$  Hz, 2H), 1.67-1.61 (m, 2H), 1.47-1.40 (m, 2H), 0.92 (t,  $J = 7.3$  Hz, 3H).  $^{13}\text{C}$  NMR (125.4 MHz,  $\text{CDCl}_3$ ):  $\delta$  142.7, 128.3, 127.3, 126.9, 83.6, 68.9, 32.0, 19.5, 13.9. MS (EI):  $m/z$  (%) 240 (10.53,  $\text{M}^+$ ), 168 (51), 167 (100), 165 (36), 163 (15), 152 (19), 107 (35), 105 (27), 77 (14). This compound was known: Onishi, Y.; Nishimoto, Y.; Yasuda, M.; Baba, A. *Chem. Lett.* **2011**, 40, 1223.

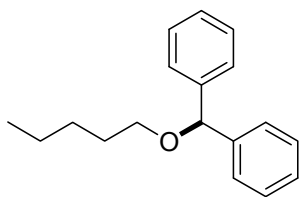

***n*-Pentyl diphenylmethyl ether (3i).** Colorless liquid.  $^1\text{H}$  NMR (500 MHz,  $\text{CDCl}_3$ ):  $\delta$  7.37-7.30 (m, 8H), 7.26-7.22 (m, 2H), 5.34 (s, 1H), 3.45 (t,  $J = 6.5$  Hz, 2H), 1.69-1.63 (m, 2H), 1.41-1.27 (m, 4H), 0.90 (t,  $J = 7.3$  Hz, 3H).  $^{13}\text{C}$  NMR (125.4 MHz,  $\text{CDCl}_3$ ):  $\delta$  142.7, 128.3, 127.3, 126.9, 83.6, 69.3, 29.6, 28.4, 22.5, 14.0. MS (EI):  $m/z$  (%) 254 (5.62,  $\text{M}^+$ ), 177 (11), 168 (50), 167 (100), 165 (32), 152 (18), 107 (34), 105 (26), 77 (11). This compound was known: Stanescu, M. A.; Varma, R. S. *Tetrahedron. Lett.* **2002**, 43, 7307.

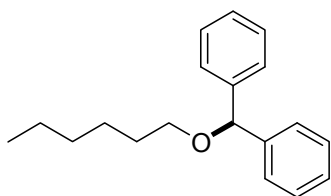

***n*-Hexyl diphenylmethyl ether (3j).** Colorless liquid.  $^1\text{H}$  NMR (500 MHz,  $\text{CDCl}_3$ ):  $\delta$  7.37-7.30 (m, 8H), 7.26-7.22 (m, 2H), 5.34 (s, 1H), 3.45 (t,  $J = 6.5$  Hz, 2H), 1.68-1.62 (m, 2H), 1.42-1.36 (m, 2H), 1.34-1.27 (m, 4H), 0.89 (t,  $J = 7.0$  Hz, 3H).  $^{13}\text{C}$  NMR (125.4 MHz,  $\text{CDCl}_3$ ):  $\delta$  142.7, 128.3, 127.3, 127.0, 83.6, 69.3, 31.7, 29.8, 25.9, 22.6, 14.0. MS (EI):  $m/z$  (%) 268 (4.42,  $\text{M}^+$ ), 191 (10), 168 (45), 167 (100), 165 (26), 152 (15), 107 (39), 105 (29), 77 (10). This compound was known: Dzhemilev, U. M.; Kutepov, B. I.; Grigor'eva, N. G.; Talipova, R. R.; Bubennov, S. V.; Yamali, E. I. *RU2404957* (in Russ.) C2, **2010**, 20101127.

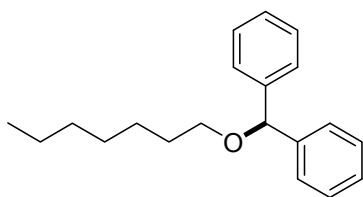

***n*-Heptyl diphenylmethyl ether (3k).** Colorless liquid.  $^1\text{H}$  NMR (500 MHz,  $\text{CDCl}_3$ ):  $\delta$  7.36-7.30 (m, 8H), 7.26-7.22 (m, 2H), 5.34 (s, 1H), 3.45 (t,  $J = 6.5$  Hz, 2H), 1.68-1.62 (m, 2H), 1.40-1.35 (m, 2H), 1.32-1.25 (m, 6H), 0.88 (t,  $J = 7.0$  Hz, 3H).  $^{13}\text{C}$  NMR (125.4 MHz,  $\text{CDCl}_3$ ):  $\delta$  142.7, 128.3, 127.3, 127.0, 83.6, 69.3, 31.8, 29.9, 29.1, 26.2, 22.6, 14.1. MS (EI):  $m/z$  (%) 282 (2.39,  $\text{M}^+$ ), 168 (45), 167 (100), 165 (25), 152 (16), 115 (12), 107 (30), 105 (22), 57 (7). This compound was known: Thiemann, T. *Lett. Org. Chem.* **2009**, 6, 515.

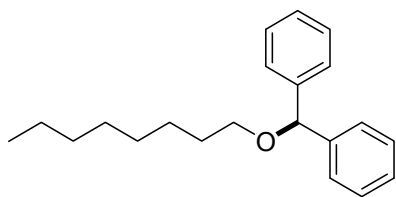

***n*-Octyl diphenylmethyl ether (3l).** Colorless liquid.  $^1\text{H}$  NMR (500 MHz,  $\text{CDCl}_3$ ):  $\delta$  7.36-7.30 (m, 8H), 7.26-7.22 (m, 2H), 5.33 (s, 1H), 3.44 (t,  $J = 6.5$  Hz, 2H), 1.67-1.61 (m, 2H), 1.37-1.25 (m, 10H), 0.88 (t,  $J = 6.8$  Hz, 3H).  $^{13}\text{C}$  NMR (125.4 MHz,  $\text{CDCl}_3$ ):  $\delta$  142.7, 128.3, 127.3, 126.9, 83.6, 69.2, 31.8, 29.9, 29.4, 29.3, 26.2, 22.6, 14.1. MS (EI):  $m/z$  (%) 296 (1.77,  $\text{M}^+$ ), 219 (6), 183 (5), 168 (45), 167 (100), 165 (22), 152 (12), 107 (21), 105 (16). This compound was known: Paredes, R.; Perez, R. L. *Tetrahedron Lett.* **1998**, *39*, 2037.

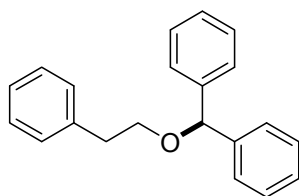

**2-Phenylethyl diphenylmethyl ether (3m).** White solid.  $^1\text{H}$  NMR (500 MHz,  $\text{CDCl}_3$ ):  $\delta$  7.30-7.22 (m, 15H), 5.36 (s, 1H), 3.67 (t,  $J = 7.0$  Hz, 2H), 2.98 (t,  $J = 7.3$  Hz, 2H).  $^{13}\text{C}$  NMR (125.4 MHz,  $\text{CDCl}_3$ ):  $\delta$  142.3, 139.1, 129.0, 128.3, 128.2, 127.3, 126.9, 126.1, 83.7, 70.0, 36.5. MS (EI):  $m/z$  (%) 288 (10.34,  $\text{M}^+$ ), 183 (18), 168 (16), 167 (100), 165 (22), 105 (12), 77 (7). This compound was known: Gharib, A.; Pesyan, N. N.; Jahangir, M.; Roshani, M.; Scheeren, J. W. *Bulg. Chem. Commun.* **2012**, *44*, 11.

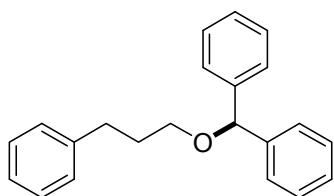

**3-Phenylpropyl diphenylmethyl ether (3n).** White solid.  $^1\text{H}$  NMR (500 MHz,  $\text{CDCl}_3$ ):  $\delta$  7.37-7.31 (m, 8H), 7.27-7.25 (m, 4H), 7.19-7.17 (m, 3H), 5.34 (s, 1H), 3.49 (t,  $J = 6.3$  Hz, 2H), 2.76 (t,  $J = 7.8$  Hz, 2H), 2.00-1.96 (m, 2H).  $^{13}\text{C}$  NMR (125.4 MHz,  $\text{CDCl}_3$ ):  $\delta$  142.5, 142.0, 128.5, 128.33, 128.27, 127.3, 127.0, 125.7, 83.6, 68.3, 32.5, 31.5. MS (EI):  $m/z$  (%) 302 (2.07,  $\text{M}^+$ ), 183 (14), 168 (21), 167 (100), 165 (16), 105 (11), 91 (23). This compound was known: Gharib, A.; Pesyan, N. N.; Jahangir, M.; Roshani, M.; Scheeren, J. W. *Bulg. Chem. Commun.* **2012**, *44*, 11.

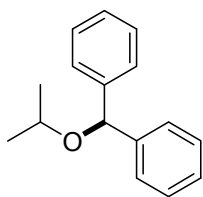

**Isopropyl diphenylmethyl ether (3o).** Colourless liquid.  $^1\text{H}$  NMR (500 MHz,  $\text{CDCl}_3$ ):  $\delta$  7.37-7.29 (m, 10H), 5.50 (s, 1H), 3.70-3.63 (m, 1H), 1.22 (d,  $J = 6.5$  Hz, 6H).  $^{13}\text{C}$  NMR (125.4 MHz,  $\text{CDCl}_3$ ):  $\delta$  142.5, 127.8, 126.7, 126.6, 80.0, 68.6, 21.8. MS (EI):  $m/z$  (%) 226 (8.14,  $\text{M}^+$ ), 183 (10), 168 (86), 167 (100), 152 (18), 107 (61), 79 (15), 77 (19). This compound was known: Venkateswara Rao, K. T.; Rao, P. S. N.; Sai Prasad, P. S.; Lingaiah, N. *Catalysis Commun.* **2009**, *10*, 1394-1397.

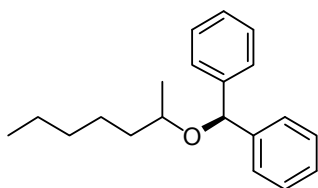

**2-Heptyl diphenylmethyl ether (3p).** Colorless liquid.  $^1\text{H}$  NMR (300 MHz,  $\text{CDCl}_3$ ):  $\delta$  7.30-7.13 (m, 10H), 5.41 (s, 1H), 3.47-3.37 (m, 1H), 1.62-1.53 (m, 1H), 1.42-1.14 (m, 7H), 1.10 (d,  $J = 6.0$  Hz, 3H), 0.79 (t,  $J = 7.1$  Hz, 3H).  $^{13}\text{C}$  NMR (125.4 MHz,  $\text{CDCl}_3$ ):  $\delta$  138.3, 127.8, 127.1, 126.9, 72.3, 70.1, 31.3, 29.3, 28.6, 25.7, 22.1, 13.5. MS (EI):  $m/z$  (%) 282 (0.30,  $\text{M}^+$ ), 168 (29), 107 (11), 105 (9). HRMS Calcd for  $\text{C}_{20}\text{H}_{26}\text{NaO}$  ( $\text{M}+\text{Na}$ ): 305.1876; found: 305.1869.

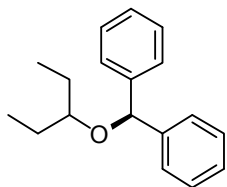

**3-Pentyl diphenylmethyl ether (3q).** Colourless liquid.  $^1\text{H}$  NMR (500 MHz,  $\text{CDCl}_3$ ):  $\delta$  7.36-7.22 (m, 10H), 5.47 (s, 1H), 3.31-3.27 (m, 1H), 1.59-1.53 (m, 4H), 0.86 (t,  $J = 7.5$  Hz, 6H).  $^{13}\text{C}$  NMR (125.4 MHz,  $\text{CDCl}_3$ ):  $\delta$  143.3, 128.2, 127.3, 127.1, 80.5, 78.7, 25.6, 9.4. MS (EI):  $m/z$  (%) 254 (0.43,  $\text{M}^+$ ), 168 (25), 167 (100), 152 (9), 107 (6), 77 (3). This compound was known: Stanescu, M. A.; Varma, R. S. *Tetrahedron Lett.* **2002**, *43*, 7307-7309.

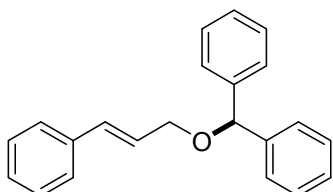

**Cinnamyl diphenylmethyl ether (3r).** Colorless liquid.  $^1\text{H}$  NMR (500 MHz,  $\text{CDCl}_3$ ):  $\delta$  7.40-7.20 (m, 15H), 6.60 (d,  $J = 16.0$  Hz, 1H), 6.35 (dt,  $J = 6.0$  Hz,  $J = 16.0$  Hz, 1H), 5.48 (s, 1H), 4.18 (dd,  $J = 1.5$  Hz,  $J = 6.0$  Hz, 2H).  $^{13}\text{C}$  NMR (125.4 MHz,  $\text{CDCl}_3$ ):  $\delta$  142.1, 136.7, 132.3, 128.5, 128.4, 127.6,



127.4, 127.0, 126.4, 126.1, 82.6, 69.3. MS (EI):  $m/z$  (%) 300 (0.06,  $M^+$ ), 168 (18), 167 (100), 165 (24), 152 (16), 118 (36), 117 (15), 115 (12), 77 (10). This compound was known: Wagh, Y. S.; Sawant, D. N.; Tambade, P. J.; Dhake, K. P.; Bhanage, B. M. *Tetrahedron*, **2011**, *67*, 2414.

**Typical Procedure for 1-Phenylethyl Bromide-Catalyzed *O*-Alkylative Cross-Etherification Reaction of 1-Phenyl ethanol with Alcohols for Synthesis of Unsymmetrical Aliphatic Ethers.**

The mixture of 1-phenyl ethanol **1j** (0.60 mL, 5 mmol), benzyl alcohol **1a** (0.57 mL, 5.5 mmol, 1.1 equiv.), and 1-phenylethyl bromide (0.034 mL, 0.25 mmol, 5 mol%) was sealed under air in a 20 mL Schlenk tube, stirred at 120 °C for 24 h, and then monitored by TLC and/or GC-MS. After completion of the reaction, the mixture was directly purified, without any workup, through a silica gel column using ethyl acetate and petroleum ether as the eluent, giving benzyl 1-phenylethyl ether **4a** in 81% isolated yield.

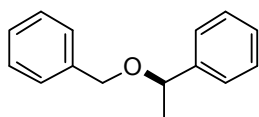

**Benzyl 1-phenylethyl ether (4a).** Colorless liquid.  $^1\text{H}$  NMR (500 MHz,  $\text{CDCl}_3$ ):  $\delta$  7.38-7.27 (m, 10H), 4.51 (q,  $J = 6.5$  Hz, 1H), 4.46 (d,  $J = 11.5$  Hz, 1H), 4.31 (d,  $J = 12.0$  Hz, 1H), 1.49 (d,  $J = 6.5$  Hz, 3H).  $^{13}\text{C}$  NMR (125.4 MHz,  $\text{CDCl}_3$ ):  $\delta$  143.7, 138.6, 128.5, 128.3, 127.7, 127.48, 127.45, 126.3, 77.2, 70.3, 24.2. MS (EI):  $m/z$  (%) 212 (0.01,  $M^+$ ), 121 (14), 106 (51), 105 (35), 92 (19), 91 (100), 77 (12), 65 (7). This compound was known: Rahaim, R. J.; Maleczka, R. E. *Org. Lett.* **2011**, *13*, 584.

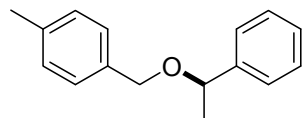

**(*p*-Methylphenyl)methyl 1-phenylethyl ether (4b).** Colorless liquid.  $^1\text{H}$  NMR (500 MHz,  $\text{CDCl}_3$ ):  $\delta$  7.40-7.36 (m, 4H), 7.32-7.28 (m, 1H), 7.21 (d,  $J = 8.0$  Hz, 2H), 7.15 (d,  $J = 8.0$  Hz, 2H), 4.49 (q,  $J = 6.5$  Hz, 1H), 4.42 (d,  $J = 11.5$  Hz, 1H), 4.25 (d,  $J = 12.0$  Hz, 1H), 2.35 (s, 3H), 1.47 (d,  $J = 6.5$  Hz, 3H).  $^{13}\text{C}$  NMR (125.4 MHz,  $\text{CDCl}_3$ ):  $\delta$  143.8, 137.1, 135.6, 129.0, 128.4, 127.8, 127.4, 126.3, 76.9, 70.1, 24.2, 21.1. MS (EI):  $m/z$  (%) 226 (0.08,  $M^+$ ), 121 (36), 106 (53), 105 (100), 91 (28), 79 (12), 77 (16). HRMS Calcd for  $\text{C}_{16}\text{H}_{18}\text{NaO}$  ( $M+\text{Na}$ ): 249.1250; found: 249.1266.

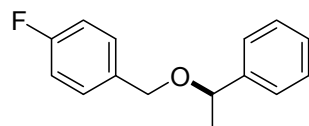

**(*p*-Fluorophenyl)methyl 1-phenylethyl ether (4c).** Colorless liquid.  $^1\text{H}$  NMR (500 MHz,  $\text{CDCl}_3$ ):  $\delta$  7.40-7.35 (m, 4H), 7.32-7.26 (m, 3H), 7.04-7.00 (m, 2H), 4.49 (q,  $J = 6.5$  Hz, 1H), 4.40 (d,  $J = 11.5$  Hz, 1H), 4.27 (d,  $J = 11.5$  Hz, 1H), 1.49 (d,  $J = 6.5$  Hz, 3H).  $^{13}\text{C}$  NMR (125.4 MHz,  $\text{CDCl}_3$ ):  $\delta$  162.3

(d,  $J_{C-F} = 244.5$  Hz), 143.6, 134.4 (d,  $J_{C-F} = 3.1$  Hz), 129.4 (d,  $J_{C-F} = 8.0$  Hz), 128.5, 127.6, 126.3, 115.2 (d,  $J_{C-F} = 21.3$  Hz), 77.3, 69.6, 24.1. MS (EI):  $m/z$  (%) 230 (0.03,  $M^+$ ), 110 (12), 109 (100), 106 (63), 105 (35), 91 (16), 77 (12). HRMS Calcd for  $C_{15}H_{15}FNaO$  ( $M+Na$ ): 253.0999; found: 253.1003.

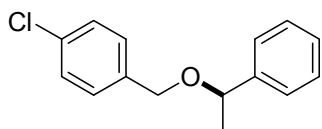

**(*p*-Chlorophenyl)methyl 1-phenylethyl ether (4d).** Colorless liquid.  $^1H$  NMR (500 MHz,  $CDCl_3$ ):  $\delta$  7.39-7.34 (m, 4H), 7.32-7.29 (m, 3H), 7.26-7.24 (m, 2H), 4.48 (q,  $J = 6.5$  Hz, 1H), 4.40 (d,  $J = 12.0$  Hz, 1H), 4.27 (d,  $J = 12.0$  Hz, 1H), 1.49 (d,  $J = 6.5$  Hz, 3H).  $^{13}C$  NMR (125.4 MHz,  $CDCl_3$ ):  $\delta$  143.4, 137.1, 133.2, 129.0, 128.53, 128.48, 127.6, 126.3, 77.4, 69.5, 24.1. MS (EI):  $m/z$  (%) 247 ( $M+1$ ), 246 (0.07,  $M^+$ ), 127 (33), 126 (11), 125 (97), 106 (100), 105 (59), 91 (32), 89 (13), 79 (10), 77 (20). HRMS Calcd for  $C_{15}H_{15}ClNaO$  ( $M+Na$ ): 269.0704; found: 269.0693.

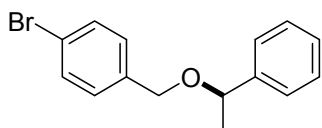

**(*p*-Bromophenyl)methyl 1-phenylethyl ether (4e).** Colorless liquid.  $^1H$  NMR (500 MHz,  $CDCl_3$ ):  $\delta$  7.47-7.45 (m, 2H), 7.39-7.34 (m, 4H), 7.32-7.29 (m, 1H), 7.19 (d,  $J = 8.5$  Hz, 2H), 4.48 (q,  $J = 6.5$  Hz, 1H), 4.38 (d,  $J = 12.0$  Hz, 1H), 4.25 (d,  $J = 12.5$  Hz, 1H), 1.49 (d,  $J = 6.5$  Hz, 3H).  $^{13}C$  NMR (125.4 MHz,  $CDCl_3$ ):  $\delta$  143.4, 137.6, 131.4, 129.3, 128.5, 127.6, 126.3, 121.3, 77.4, 69.5, 24.1. MS (EI):  $m/z$  (%) 291 ( $M+1$ ), 290 (0.03,  $M^+$ ), 171 (53), 169 (54), 106 (100), 105 (53), 91 (31), 90 (18), 89 (12), 77 (18). HRMS Calcd for  $C_{15}H_{15}BrNaO$  ( $M+Na$ ): 313.0198; found: 313.0183.

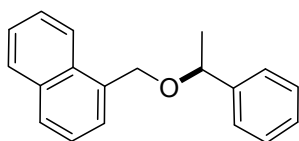

**(1-Naphthyl)methyl 1-phenylethyl ether (4f).** Colorless liquid.  $^1H$  NMR (500 MHz,  $CDCl_3$ ):  $\delta$  8.07-8.05 (m, 1H), 7.88-7.86 (m, 1H), 7.81 (d,  $J = 8.0$  Hz, 1H), 7.53-7.49 (m, 2H), 7.46-7.41 (m, 5H), 7.37-7.30 (m, 2H), 4.92 (d,  $J = 12.0$  Hz, 1H), 4.74 (d,  $J = 12.0$  Hz, 1H), 4.60 (q,  $J = 6.5$  Hz, 1H), 1.51 (d,  $J = 6.5$  Hz, 3H).  $^{13}C$  NMR (125.4 MHz,  $CDCl_3$ ):  $\delta$  143.6, 134.0, 133.7, 131.7, 128.51, 128.47, 128.4, 127.6, 126.4, 126.3, 126.0, 125.7, 125.2, 124.0, 77.4, 68.8, 24.2. MS (EI):  $m/z$  (%) 262 (6.94,  $M^+$ ), 142 (100), 141 (66), 129 (29), 115 (30), 106 (24), 105 (50), 91 (21), 77 (30). HRMS Calcd for  $C_{19}H_{18}NaO$  ( $M+Na$ ): 285.1250; found: 285.1255.

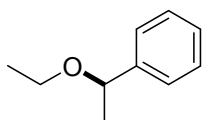

**Ethyl 1-phenylethyl ether (4g).** Colorless liquid.  $^1\text{H}$  NMR (500 MHz,  $\text{CDCl}_3$ ):  $\delta$  7.36-7.29 (m, 5H), 4.40 (q,  $J = 6.5$  Hz, 1H), 3.35 (q,  $J = 7.0$  Hz, 2H), 1.44 (d,  $J = 6.5$  Hz, 3H), 1.19 (t,  $J = 7.0$  Hz, 3H).  $^{13}\text{C}$  NMR (125.4 MHz,  $\text{CDCl}_3$ ):  $\delta$  144.2, 128.4, 127.3, 126.1, 77.7, 63.9, 24.2, 15.4. MS (EI):  $m/z$  (%) 150 (1.97,  $\text{M}^+$ ), 135 (100), 106 (66), 105 (49), 79 (51), 77 (26). This compound was known: Podder, S.; Choudhury, J.; Roy, S. *J. Org. Chem.* **2007**, 72, 3129.

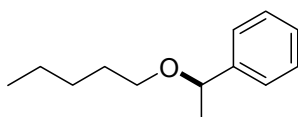

**n-Pentyl 1-phenylethyl ether (4h).** Colorless liquid.  $^1\text{H}$  NMR (500 MHz,  $\text{CDCl}_3$ ):  $\delta$  7.36-7.30 (m, 4H), 7.28-7.26 (m, 1H), 4.40 (q,  $J = 6.5$  Hz, 1H), 3.28 (t,  $J = 6.8$  Hz, 2H), 1.59-1.55 (m, 2H), 1.43 (d,  $J = 6.5$  Hz, 3H), 1.34-1.26 (m, 4H), 0.89-0.86 (m, 3H).  $^{13}\text{C}$  NMR (125.4 MHz,  $\text{CDCl}_3$ ):  $\delta$  144.3, 128.3, 127.2, 126.1, 77.9, 68.8, 29.6, 28.4, 24.2, 22.5, 14.0. MS (EI):  $m/z$  (%) 192 (0.16,  $\text{M}^+$ ), 177 (37), 107 (100), 106 (21), 105 (77), 79 (21), 77 (12). This compound was known: Ke, F.; Li, Z.-K.; Xiang, H.-F.; Zhou, X.-G. *Tetrahedron Lett.* **2011**, 52, 318.

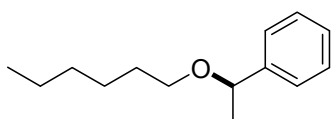

**n-Hexyl 1-phenylethyl ether (4i).** Colorless liquid.  $^1\text{H}$  NMR (500 MHz,  $\text{CDCl}_3$ ):  $\delta$  7.35-7.30 (m, 4H), 7.27-7.24 (m, 1H), 4.38 (q,  $J = 6.5$  Hz, 1H), 3.28 (t,  $J = 6.8$  Hz, 2H), 1.57-1.53 (m, 2H), 1.43 (d,  $J = 6.5$  Hz, 3H), 1.33-1.23 (m, 6H), 0.87 (t,  $J = 7.0$  Hz, 3H).  $^{13}\text{C}$  NMR (125.4 MHz,  $\text{CDCl}_3$ ):  $\delta$  144.3, 128.3, 127.2, 126.1, 77.9, 68.8, 31.7, 29.9, 25.9, 24.2, 22.6, 14.0. MS (EI):  $m/z$  (%) 206 (0.14,  $\text{M}^+$ ), 191 (31), 107 (100), 106 (21), 105 (73), 79 (16), 77 (9). This compound was known: Dzhemilev, U. M.; Kutepov, B. I.; Grigor'eva, N. G.; Talipova, R. R.; Bubennov, S. V.; Yamali, E. I. *RU2404957* (in Russ.) C2, **2010**, 20101127.

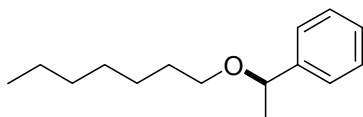

**n-Heptyl 1-phenylethyl ether (4j).** Colorless liquid.  $^1\text{H}$  NMR (500 MHz,  $\text{CDCl}_3$ ):  $\delta$  7.36-7.25 (m, 5H), 4.38 (q,  $J = 6.5$  Hz, 1H), 3.29 (t,  $J = 6.8$  Hz, 2H), 1.59-1.54 (m, 2H), 1.44 (d,  $J = 6.5$  Hz, 3H), 1.33-1.26 (m, 8H), 0.87 (t,  $J = 6.8$  Hz, 3H).  $^{13}\text{C}$  NMR (125.4 MHz,  $\text{CDCl}_3$ ):  $\delta$  144.3, 128.3, 127.2, 126.1, 77.9, 68.8, 31.8, 30.0, 29.1, 26.1, 24.2, 22.6, 14.1. MS (EI):  $m/z$  (%) 220 (0.18,  $\text{M}^+$ ), 205 (41), 107 (100), 106 (21), 105 (75), 79 (18), 77 (11), 57 (19). Dzhemilev, U. M.; Kutepov, B. I.;

Grigor'eva, N. G.; Talipova, R. R.; Bubennov, S. V. *RU2384560* (in Russ.) C1, **2010**, 20100320.

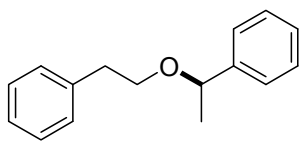

**2-Phenylethyl 1-phenylethyl ether (4k).** Colorless liquid.  $^1\text{H}$  NMR (500 MHz,  $\text{CDCl}_3$ ):  $\delta$  7.32-7.29 (m, 2H), 7.26-7.22 (m, 5H), 7.20-7.17 (m, 3H), 4.40 (q,  $J = 6.5$  Hz, 1H), 3.51 (t,  $J = 7.5$  Hz, 2H), 2.93-2.83 (m, 2H), 1.43 (d,  $J = 6.5$  Hz, 3H).  $^{13}\text{C}$  NMR (125.4 MHz,  $\text{CDCl}_3$ ):  $\delta$  143.9, 139.0, 128.9, 128.3, 128.2, 127.3, 126.09, 126.06, 78.1, 69.6, 36.5, 24.1. MS (EI):  $m/z$  (%) 226 (5.63,  $\text{M}^+$ ), 106 (11), 105 (100), 104 (14), 79 (10). This compound was known: Rosenfeld, D. C.; Shekhar, S.; Takemiya, A.; Utsunomiya, M.; Hartwig, J. F. *Org. Lett.* **2006**, 8, 4179.

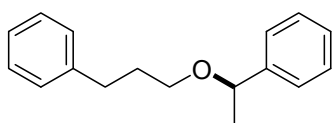

**3-Phenylpropyl 1-phenylethyl ether (4l).** Colorless liquid.  $^1\text{H}$  NMR (500 MHz,  $\text{CDCl}_3$ ):  $\delta$  7.37-7.32 (m, 4H), 7.29-7.25 (m, 3H), 7.19-7.15 (m, 3H), 4.39 (q,  $J = 6.5$  Hz, 1H), 3.34-3.32 (m, 2H), 2.75-2.61 (m, 2H), 1.92-1.86 (m, 2H), 1.46 (d,  $J = 6.5$  Hz, 3H).  $^{13}\text{C}$  NMR (125.4 MHz,  $\text{CDCl}_3$ ):  $\delta$  144.1, 142.1, 128.43, 128.36, 128.2, 127.3, 126.1, 125.7, 78.0, 67.8, 32.4, 31.5, 24.1. MS (EI):  $m/z$  (%) 240 (0.56,  $\text{M}^+$ ), 135 (21), 134 (25), 105 (100), 104 (17), 91 (72), 77 (11). This compound was known: Iwanami, K.; Yano, K.; Oriyama, T. *Chem. Lett.* **2007**, 36, 38.

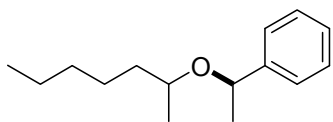

(*RR/SS/RS/SR* ~1/1/1/1 mixtures)

**1-Phenylethyl 2-heptyl ether (4m).** Colourless liquid.  $^1\text{H}$  NMR (500 MHz,  $\text{CDCl}_3$ ):  $\delta$  7.27-7.17 (m, 5H+5H), 4.47-4.42 (m, 1H+1H), 3.34-3.27 (m, 1H) or 3.23-3.17 (m, 1H), 1.49-1.11 (m, 11H+11H), 1.05 (d,  $J = 6.0$  Hz, 3H) or 0.96 (d,  $J = 6.5$  Hz, 3H), 0.83 (t,  $J = 7.0$  Hz, 3H) or 0.76 (t,  $J = 7.3$  Hz, 3H).  $^{13}\text{C}$  NMR (125.4 MHz,  $\text{CDCl}_3$ ):  $\delta$  145.1 (144.6), 128.3 (128.2), 127.2 (127.1), 126.5 (126.2), 75.4 (74.5), 73.2 (71.9), 37.5 (36.0), 32.1 (31.8), 25.3 (25.0), 24.7 (24.4), 22.7 (22.6), 20.8 (19.3), 14.05 (14.00). MS (EI):  $m/z$  (%) 220 (0.01,  $\text{M}^+$ ), 205 (9), 107 (31), 105 (100), 77 (6). HRMS Calcd for  $\text{C}_{15}\text{H}_{24}\text{NaO}$  ( $\text{M}+\text{Na}$ ): 243.1719; found: 243.1711.

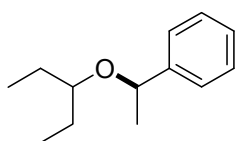

**1-Phenylethyl 3-pentyl ether (4n).** Colorless liquid.  $^1\text{H}$  NMR (500 MHz,  $\text{CDCl}_3$ ):  $\delta$  7.34-7.26 (m, 5H), 4.50 (q,  $J = 6.3$  Hz, 1H), 3.12 (t,  $J = 5.8$  Hz, 1H), 1.57-1.36 (m, 7H), 0.90 (t,  $J = 7.5$  Hz, 3H),

0.77 (t,  $J = 7.5$  Hz, 3H).  $^{13}\text{C}$  NMR (125.4 MHz,  $\text{CDCl}_3$ ):  $\delta$  144.3, 127.7, 126.7, 126.0, 78.2, 74.6, 26.1, 24.7, 23.8, 9.4, 8.5. MS (EI):  $m/z$  (%) 178 (0.87,  $\text{M}^+$ ), 177 (7), 163 (10), 107 (14), 105 (100), 79 (8). HRMS Calcd for  $\text{C}_{13}\text{H}_{20}\text{NaO}$  ( $\text{M}+\text{Na}$ ): 215.1406; found: 215.1397.

**Typical Procedure for Cinnamyl Bromide-Catalyzed *O*-Alkylative Cross-Etherification Reaction of Cinnamyl Alcohol with Alcohols for Synthesis of Unsymmetrical Aliphatic Ethers.**

The mixture of cinnamyl alcohol **1h** (0.671 g, 5 mmol), benzyl alcohol **1a** (0.57 mL, 5.5 mmol, 1.1 equiv) and cinnamyl bromide (0.0493 g, 0.25 mmol, 5 mol%) was sealed under air in a 20 mL Schlenk tube, stirred at 60 °C for 46 h, and then monitored by TLC and/or GC-MS. After completion of the reaction, the mixture was directly purified, without any workup, through a silica gel column using ethyl acetate and petroleum ether as the eluent, giving benzyl cinnamyl ether **5a** in 75% isolated yield.

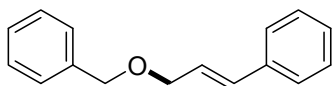

**Benzyl cinnamyl ether (5a).** Colorless liquid.  $^1\text{H}$  NMR (500 MHz,  $\text{CDCl}_3$ ):  $\delta$  7.42-7.27 (m, 10H), 6.65 (d,  $J = 15.5$  Hz, 1H), 6.35 (dt,  $J = 6.0$  Hz,  $J = 16$  Hz, 1H), 4.60 (s, 2H), 4.22 (dd,  $J = 1.5$  Hz,  $J = 6.0$  Hz, 2H).  $^{13}\text{C}$  NMR (125.4 MHz,  $\text{CDCl}_3$ ):  $\delta$  138.2, 136.7, 132.5, 128.5, 128.4, 127.8, 127.65, 127.62, 126.5, 126.1, 72.1, 70.7. MS (EI):  $m/z$  (%) 224 (12.82,  $\text{M}^+$ ), 223 (80), 195 (22), 152 (26), 119 (14). This compound was known: Billard, F.; Robiette, R.; Pospisil, J. *J. Org. Chem.* **2012**, *77*, 6358.

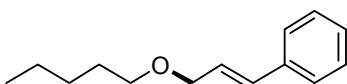

***n*-Pentyl cinnamyl ether (5b).** Colorless liquid.  $^1\text{H}$  NMR (500 MHz,  $\text{CDCl}_3$ ):  $\delta$  7.40-7.38 (m, 2H), 7.34-7.30 (m, 2H), 7.25-7.22 (m, 1H), 6.61 (d,  $J = 16.0$  Hz, 1H), 6.31 (dt,  $J = 6.0$  Hz,  $J = 16.0$  Hz, 1H), 4.14 (dd,  $J = 1.5$  Hz,  $J = 6.0$  Hz, 2H), 3.48 (t,  $J = 7.0$  Hz, 2H), 1.64-1.60 (m, 2H), 1.37-1.34 (m, 4H), 0.91 (t,  $J = 6.8$  Hz, 3H).  $^{13}\text{C}$  NMR (125.4 MHz,  $\text{CDCl}_3$ ):  $\delta$  136.8, 132.1, 128.5, 127.6, 126.8, 126.4, 71.4, 70.6, 29.5, 28.4, 22.6, 14.0. MS (EI):  $m/z$  (%) 206 ( $\text{M}+2$ ), 204 (1.28,  $\text{M}^+$ ), 190 (31), 133 (26), 117 (62), 115 (62), 92 (100), 91 (43), 78 (28).

**Typical Procedure for Benzyl Bromide-Catalyzed *O*-Alkylative Cross-Etherification Reaction of Benzyl Alcohol with Alcohols for Synthesis of Unsymmetrical Aliphatic Ethers.**

The mixture of benzyl alcohol **1a** (0.52 mL, 5.0 mmol), (4-methoxyphenyl)methanol (0.74 mL, 6.0 mmol, 1.2 equiv) and benzyl bromide (0.03 mL, 0.25 mmol, 5 mol%) was sealed under air in a 20 mL Schlenk

tube, stirred at 120 °C for 32 h, and then monitored by TLC and/or GC-MS. After completion of the reaction, the mixture was directly purified, without any workup, through a silica gel column using ethyl acetate and petroleum ether as the eluent, giving benzyl (*p*-methoxyphenyl)methyl ether **6a** in 50% isolated yield.

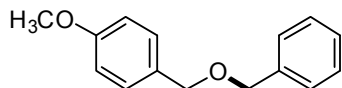

**Benzyl (*p*-methoxyphenyl)methyl ether (6a).** Colourless liquid. <sup>1</sup>H NMR (500 MHz, CDCl<sub>3</sub>): δ 7.39-7.28 (m, 7H), 6.92-6.86 (m, 2H), 4.56 (s, 2H), 4.52 (s, 2H), 3.84 (s, 3H). <sup>13</sup>C NMR (125.4 MHz, CDCl<sub>3</sub>): 159.3, 138.4, 130.4, 129.4, 128.4, 127.8, 127.6, 113.8, 71.84, 71.79, 55.3. MS (EI): *m/z* (%) 228 (13.32, M<sup>+</sup>), 137 (98), 121 (100), 109 (19), 91 (50), 77(19). This compound was known: Zeng, C. -C.; Zhang, N. -T.; Lam, C. M.; Little, R. D. *Org. Lett.* **2012**, *14*, 1314-1317.

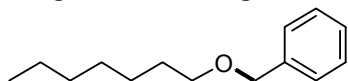

**Benzyl 1-heptyl ether (6b).** Colourless liquid. <sup>1</sup>H NMR (500 MHz, CDCl<sub>3</sub>): δ 7.37-7.27 (m, 5H), 4.51 (s, 2H), 3.46 (t, *J* = 6.8 Hz, 2H), 1.64-1.59 (m, 2H), 1.37-1.26 (m, 8H), 0.88 (t, *J* = 6.8 Hz, 3H). <sup>13</sup>C NMR (125.4 MHz, CDCl<sub>3</sub>): δ 138.7, 128.3, 127.6, 127.5, 72.9, 70.5, 31.8, 29.8, 29.2, 26.2, 22.6, 14.1. MS (EI): *m/z* (%) 206 (12.82, M<sup>+</sup>), 97 (16), 92 (79), 91 (100), 55 (18). This compound was known: Zhou, J. R. Fu, G. C. *J. Am. Chem. Soc.* **2003**, *125*, 12527-12530.

**Typical Procedure for *t*-Butyl Bromide-Catalyzed *O*-Alkylative Cross-Etherification Reaction of *t*-Butyl Alcohol with Alcohols for Synthesis of Unsymmetrical Aliphatic Ethers.** The mixture of *t*-butyl alcohol **11** (0.46 mL, 5 mmol), benzyl alcohol **1a** (0.57 mL, 5.5 mmol, 1.1 equiv) and *t*-butyl bromide (0.028 mL, 0.25 mmol, 5 mol%) was sealed under air in a 20 mL Schlenk tube, stirred at 60 °C for 57 h, and then monitored by TLC and/or GC-MS. After completion of the reaction, the mixture was directly purified, without any workup, through a silica gel column using ethyl acetate and petroleum ether as the eluent, giving Benzyl *t*-butyl ether **7a** in 57% isolated yield.

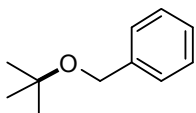

**Benzyl *t*-butyl ether (7a).** Colorless liquid. <sup>1</sup>H NMR (500 MHz, CDCl<sub>3</sub>): δ 7.37-7.32 (m, 5H), 4.45 (s, 2H), 1.30 (s, 9H). <sup>13</sup>C NMR (125.4 MHz, CDCl<sub>3</sub>): δ 139.9, 128.3, 127.4, 127.1, 73.4, 64.1, 27.7. MS (EI): *m/z* (%) 164 (2.45, M<sup>+</sup>), 149 (25), 107 (6), 91 (100), 79 (9), 57 (19). This compound was known: Cui, X. J.; Zhang, S. G.; Shi, F.; Zhang, Q. H.; Ma, X. Y.; Lu, L. J.; Deng, Y. Q. *ChemSusChem*, **2010**, *3*, 1043.

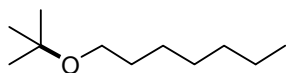

***n*-Heptyl *t*-butyl ether (7b).** Colorless liquid.  $^1\text{H}$  NMR (500 MHz,  $\text{CDCl}_3$ ):  $\delta$  3.32 (t,  $J = 7.0$  Hz, 2H), 1.54-1.49 (m, 2H), 1.30-1.28 (m, 8H), 1.19 (s, 9H), 0.88 (t,  $J = 7.0$  Hz, 3H).  $^{13}\text{C}$  NMR (125.4 MHz,  $\text{CDCl}_3$ ):  $\delta$  72.4, 61.7, 31.9, 30.7, 29.2, 27.6, 26.2, 22.6, 14.1. MS (EI):  $m/z$  (%) 172 (0.08,  $\text{M}^+$ ), 157 (30), 97 (3), 87 (4), 59 (100), 58 (6), 57 (93). This compound was known: Hartz, N.; Prakash, G. K. S.; Olah, G. A. *Synlett*, **1992**, (7), 569.

**Large Scale Reaction of Benzyl alcohol (1a) Catalyzed by Benzyl Bromide for Dibenzyl Ether (2a) Preparation (eq. 5 in the text).** As shown by the picture below, to a 100 mL round-bottomed flask equipped with a water separator and a condenser open to air were added 50 mL benzyl alcohol **1a** (484 mmol) and  $\text{PhCH}_2\text{Br}$  (6 mL, 50.5 mmol, 10.4 mol%). The mixture was then directly heated under air at 120 °C. During the heating byproduct water was obviously generated and easily collected in the water separator. GC analysis showed 90% conversion of **1a** after 34 h's heating at 120 °C. The condenser and the water separator were then removed and the reaction subjected to distillation under reduced pressure. A careful vacuum distillation of the reaction mixture afforded 83% isolated yield of pure benzyl ether **2a**.

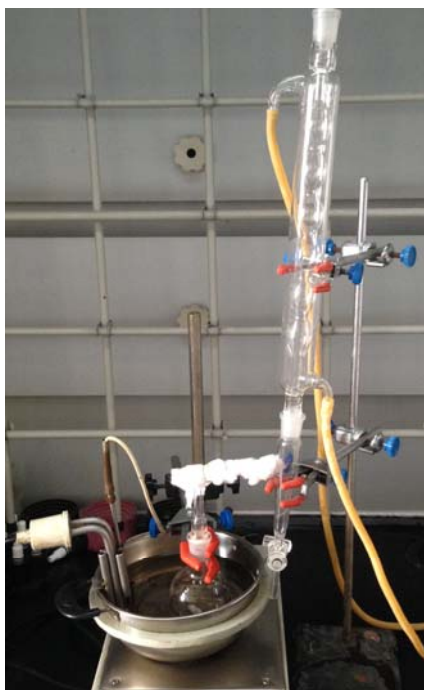

## Mechanistic Studies

1. GC detection of considerable amounts of PhCH<sub>2</sub>Br (initial catalyst loading: 10 mol%) in an almost completed etherification reaction of benzyl alcohol (1a).

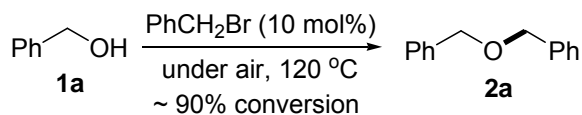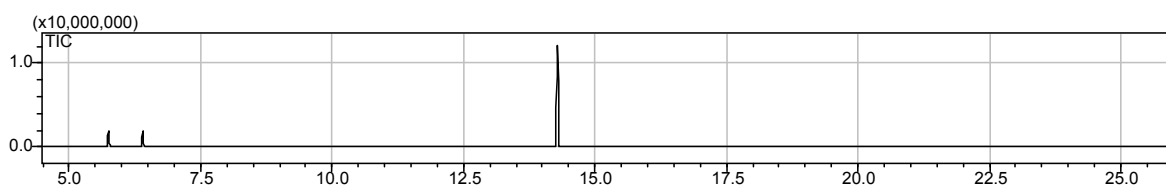

|        |        |        |              |              |          |       |      |    |
|--------|--------|--------|--------------|--------------|----------|-------|------|----|
| 5.750  | 5.717  | 5.792  | TIC 3048941  | <b>9.78</b>  | 1961459  | 12.26 | 1.55 | MI |
| 6.401  | 6.375  | 6.442  | TIC 2666968  | <b>8.56</b>  | 1949246  | 12.18 | 1.36 | MI |
| 14.288 | 14.233 | 14.350 | TIC 25447195 | <b>81.66</b> | 12088244 | 75.56 | 2.10 | MI |

**Time: 5.75 min (PhCH<sub>2</sub>OH 1a, MW 108)**

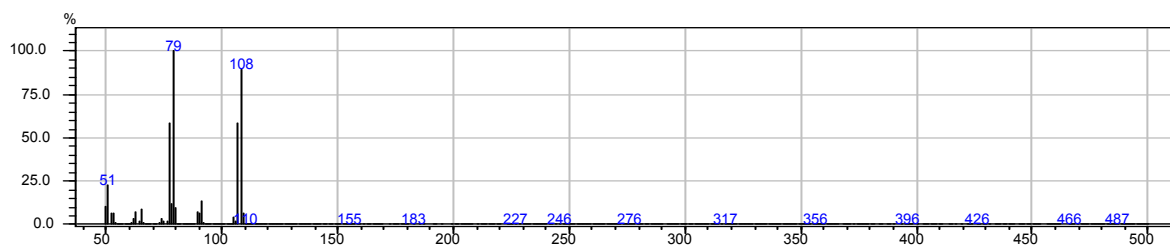

**Time: 6.40 min (catalyst PhCH<sub>2</sub>Br, MW 170, 172)**

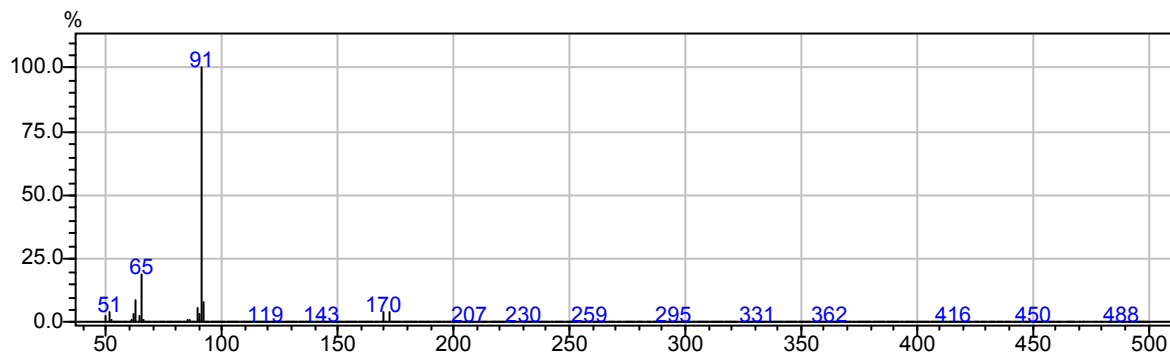

**Time: 14.28 min (PhCH<sub>2</sub>OCH<sub>2</sub>Ph 2a)**

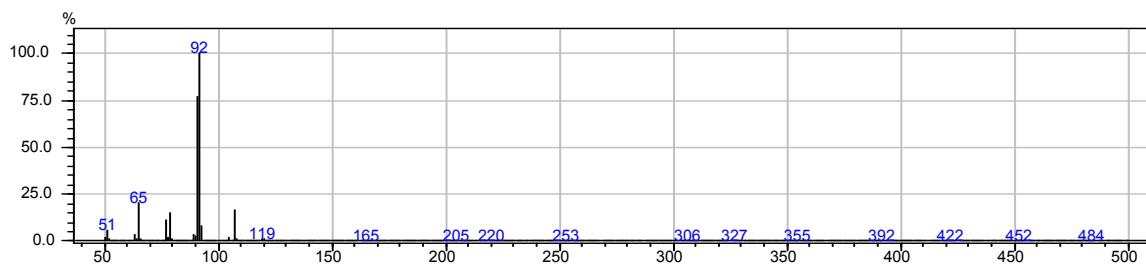



## 2. NMR detection of Ph<sub>2</sub>CHBr in Ph<sub>2</sub>CHBr-catalyzed cross-etherification reaction of benzyl alcohol (1a) and Ph<sub>2</sub>CHOH (1i).

### 2.1 Standard <sup>1</sup>H NMR spectra of the involved compounds

Ph<sub>2</sub>CHBr:

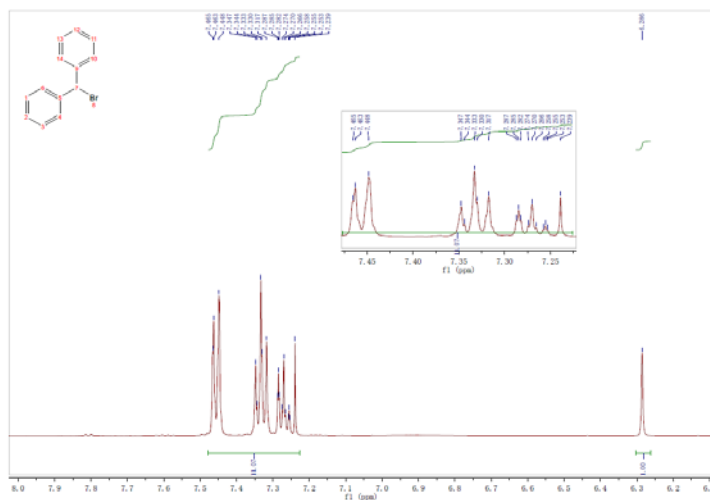

Ph<sub>2</sub>CHOH:

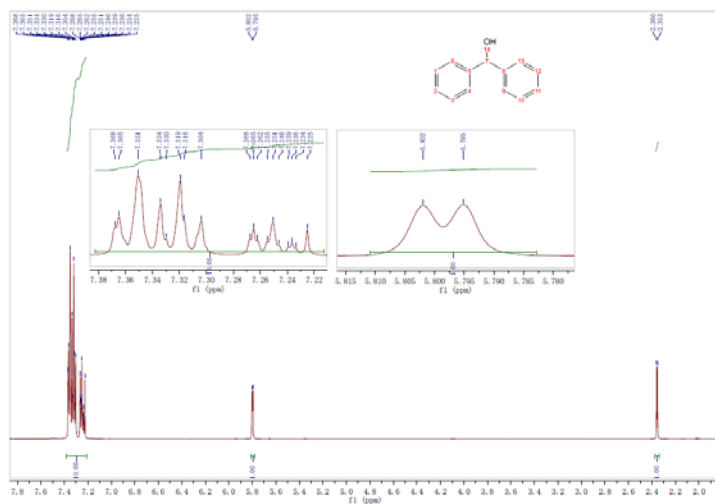

PhCH<sub>2</sub>OH:

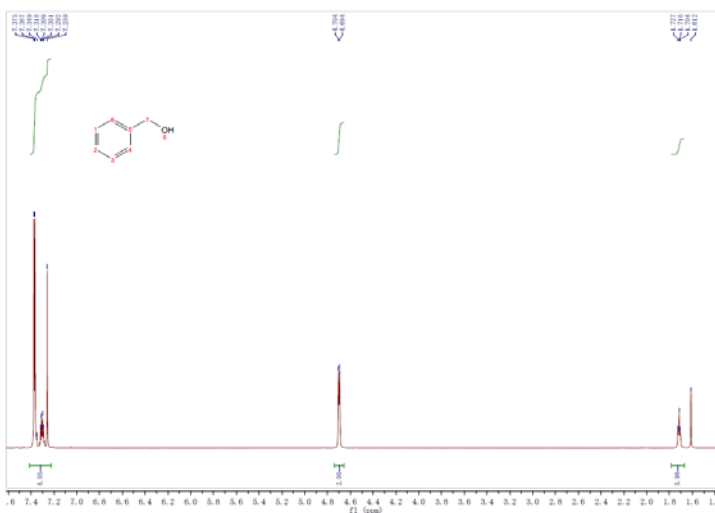

2.2 Results for  $^1\text{H}$  NMR analysis on variation of the components in  $\text{Ph}_2\text{CHBr}$ -catalyzed cross-etherification reaction of **1a** and **1i**. These data were then converted to the following figure using Microsoft Excel 2010.

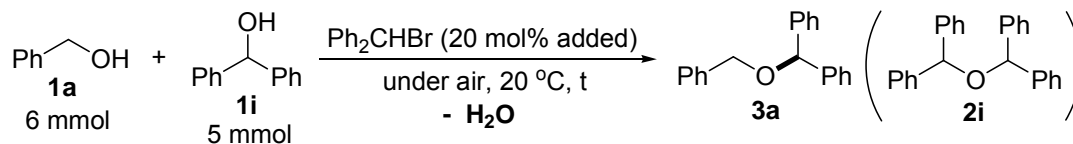

| run | NMR spectra No. | time   | <b>3a</b> % | <b>1i</b> % (conversion) | $\text{Ph}_2\text{CHBr}$ (mol%) |
|-----|-----------------|--------|-------------|--------------------------|---------------------------------|
| 1   | (1)             | 20 min | 10          | 13                       | 21                              |
| 2   | (2)             | 1 h    | 43          | 54                       | 14                              |
| 3   | (3)             | 2 h    | 57          | 73                       | 13                              |
| 4   | (4)             | 3 h    | 65          | 82                       | 10                              |
| 4   | (5)             | 5 h    | 72          | 90                       | 9                               |

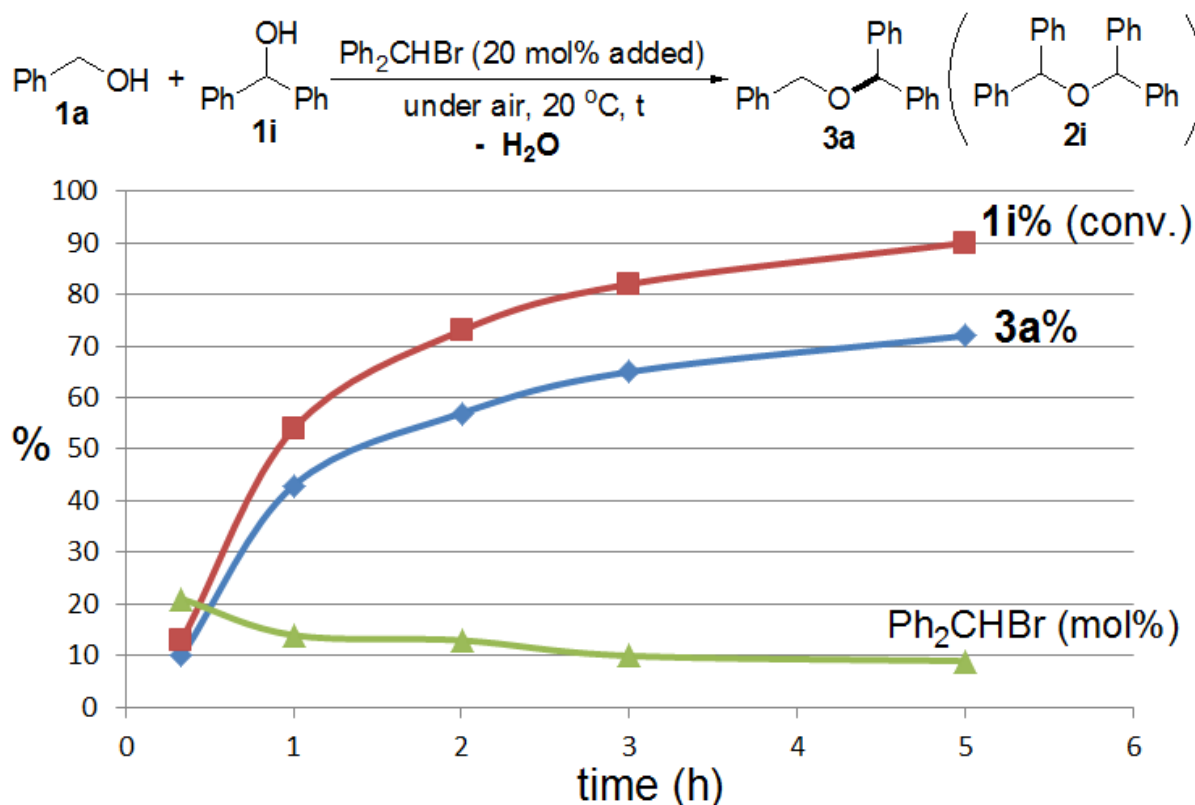

Figure. (Figure 1 in the text).

(1)  $^1\text{H}$  NMR spectra of run 1: 20 °C, 20 min

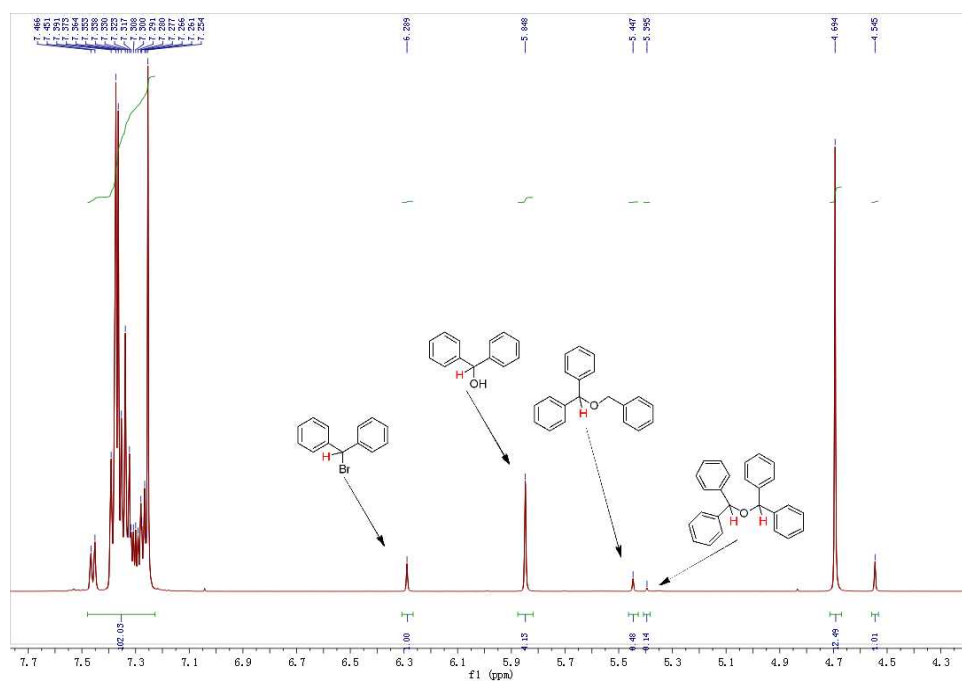

$3\text{a}\%$ :  $0.48/(4.13+0.48+0.14) = 10\%$

$1\text{i}\%$  (conversion):  $(0.48 + 0.14)/(4.13+0.48+0.14) = 13\%$

$\text{Ph}_2\text{CHBr}$  (mol%):  $1.00/(4.13+0.48+0.14) = 1/4.75 = 21$  mol% (initial catalyst loading 20 mol%)

(2)  $^1\text{H}$  NMR spectra of run 2: 20 °C, 1 h

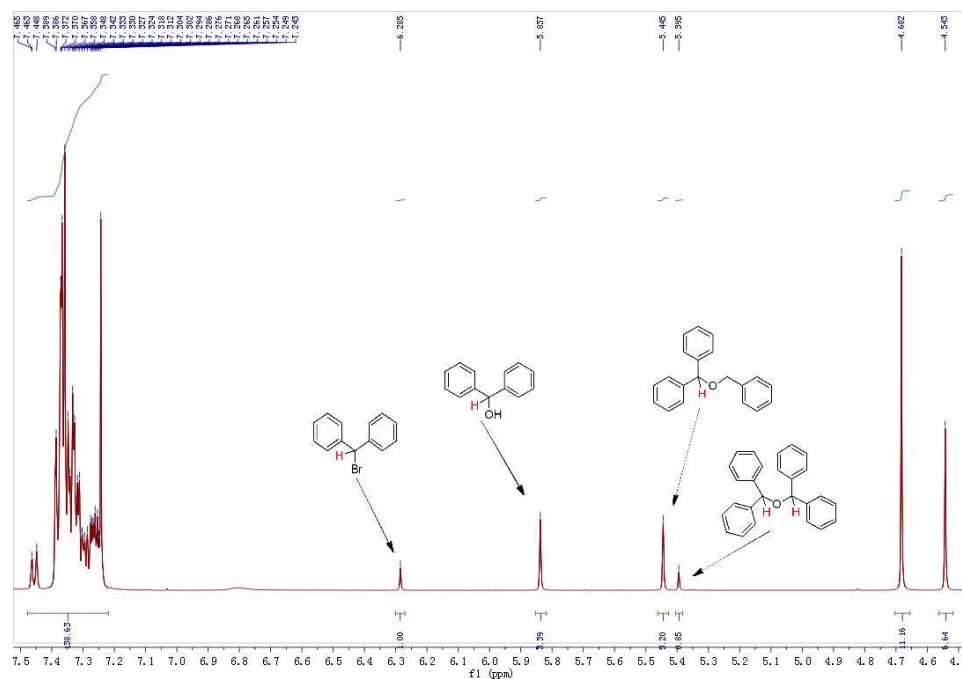

$3\text{a}\%$ :  $3.20/(3.39+3.20+0.85) = 43\%$

$1\text{i}\%$  (conversion):  $(3.20 + 0.85)/(3.39+3.20+0.85) = 54\%$

$\text{Ph}_2\text{CHBr}$  (mol%):  $1/(3.39+3.20+0.85) = 1/7.44 = 14$  mol%

**(3)  $^1\text{H}$  NMR spectra of run 3: 20 °C, 2 h**

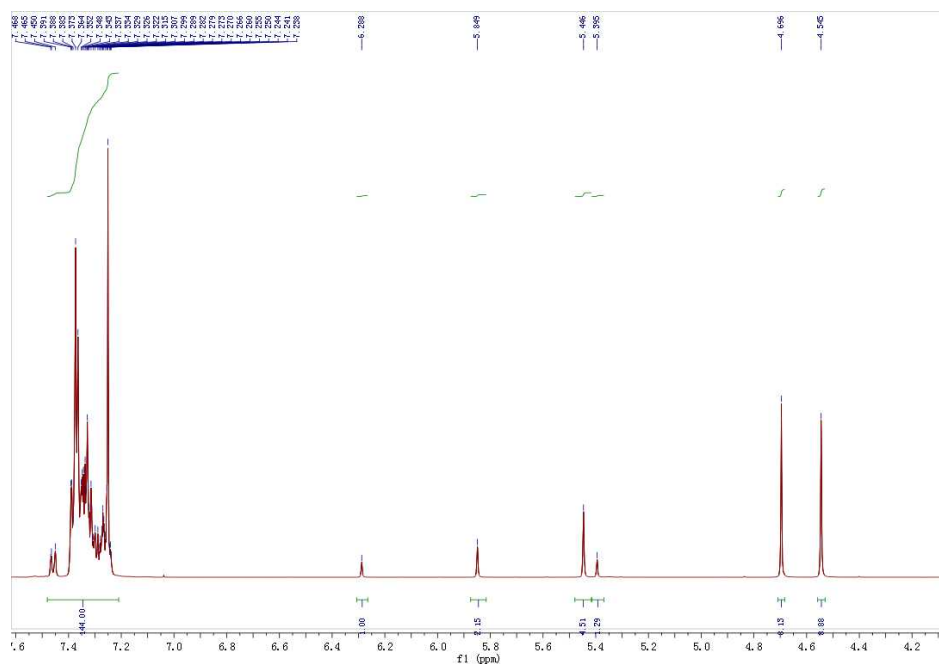

$$3\mathbf{a}\% = 4.51/(2.15+4.51+1.29) = 57\%$$

$$1\mathbf{i}\% \text{ (conversion): } (4.51 + 1.29) = 73\%$$

$$\text{Ph}_2\text{CHBr mol}\% = 1/(2.15+4.51+1.29)=1/7.95 = 13 \text{ mol}\%$$

**(4)  $^1\text{H}$  NMR spectra of run 4: 20 °C, 3 h**

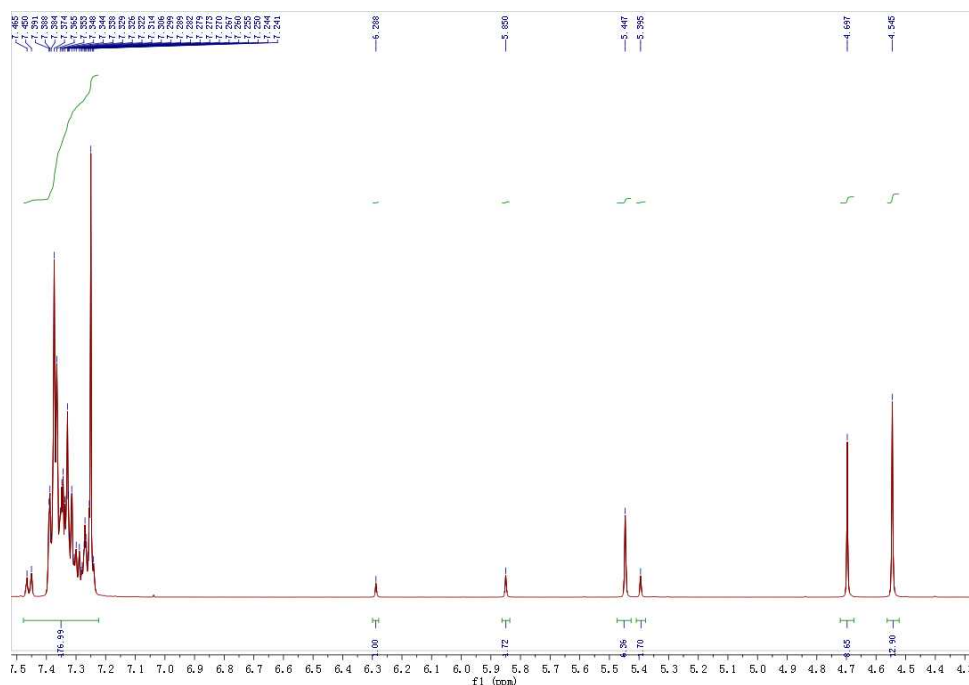

$$3\mathbf{a}\% = 6.36/(1.72+6.36+1.70) = 65\%$$

$$1\mathbf{i}\% \text{ (conversion): } (6.36 + 1.60)/(1.72+6.36+1.70) = 82\%$$

$$\text{Ph}_2\text{CHBr mol}\% = 1/(1.72+6.36+1.70) = 1/9.78 = 10 \text{ mol}\%$$

(5)  $^1\text{H}$  NMR spectra of run 5: 20 °C, 5 h

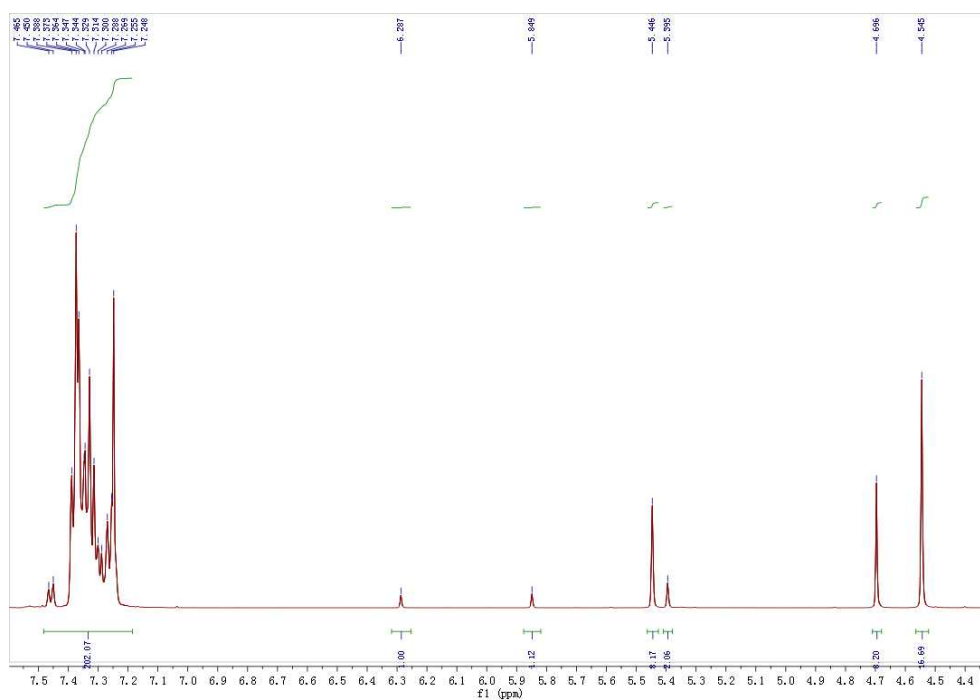

$$\mathbf{3a\%} = 8.17 / (1.12 + 8.17 + 2.06) = 72\%$$

$$\mathbf{1i\% \text{ (conversion)}}: (8.17 + 2.06) / (1.12 + 8.17 + 2.06) = 90\%$$

$$\text{Ph}_2\text{CHBr mol\%} = 1 / (1.12 + 8.17 + 2.06) = 1 / 11.35 = 9 \text{ mol\%}$$

**3. Racemic PhCH(CH<sub>3</sub>)Br-catalyzed diastereo-selective homo-etherification reaction of optically active (S)-1-phenyl ethanol (**1j**, 98%*ee*) (eq. 6 in the text)**

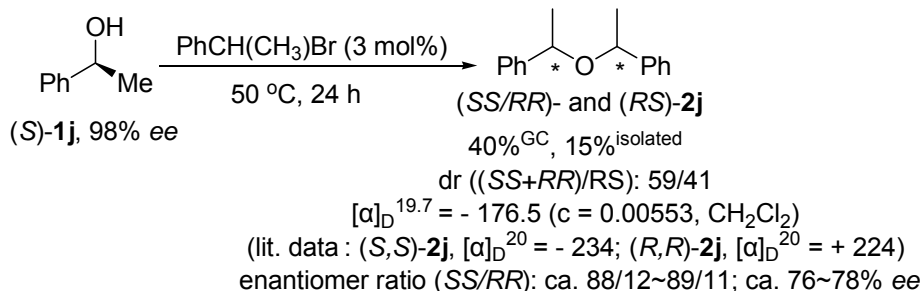

15% isolated yield (0.136 g) of **2j** was obtained in an 8 mmol reaction.

0.0938 g isolated **2j** was dissolved in 10 mL CH<sub>2</sub>Cl<sub>2</sub>, c<sub>1</sub> = 0.00938.

Optical rotatory power measured:  $\alpha = -0.977$  (L = 1 dm; T = 19.7 °C;  $\lambda = 589$  nm)

(*Eur. J. Org. Chem.* 2008, 4963: (S,S)-diastereomer,  $[\alpha]_D^{20} = -234$ ; (R,R)-,  $[\alpha]_D^{20} = +224$ ).

Therefore, the mixture contains mainly the (S,S)-diastereomer.

Then, c<sub>2</sub> = 0.00938\*0.59 = 0.00553 (if 41% are the mixture of RR and SS isomers, then  $[\alpha]$  will exceed the known value of 224 or 234).

Therefore,  $[\alpha]_D^{19.7} = -176.5$  (c = 0.00553, CH<sub>2</sub>Cl<sub>2</sub>).

Therefore, enantiomer ratio SS/RR: ca. 88/12~89/11 (by comparison with the literature data).

Enantiomeric excess is ca. 76~78%.

**(1) GC spectra and data of the above reaction: 59/41 dr**

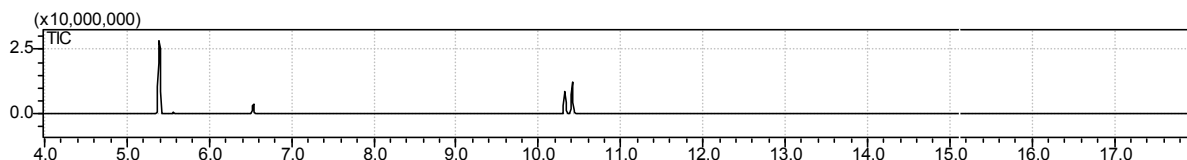

|        |        |        |              |              |          |       |      |    |
|--------|--------|--------|--------------|--------------|----------|-------|------|----|
| 5.394  | 5.350  | 5.425  | TIC 48739446 | 60.48        | 28584120 | 57.98 | 1.70 | MI |
| 10.322 | 10.292 | 10.350 | TIC 13101811 | <b>16.26</b> | 8485827  | 17.21 | 1.54 | MI |
| 10.410 | 10.383 | 10.458 | TIC 18739662 | <b>23.26</b> | 12232992 | 24.81 | 1.53 | MI |

**(2) GC spectra and data of a normal reaction using racemic 1j as the substrate:**

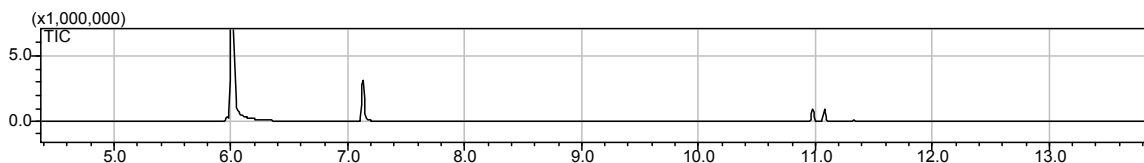

|        |        |        |              |       |          |       |      |    |
|--------|--------|--------|--------------|-------|----------|-------|------|----|
| 6.015  | 5.933  | 6.133  | TIC 33707499 | 80.48 | 16895549 | 77.36 | 1.99 | MI |
| 7.131  | 7.092  | 7.183  | TIC 5161344  | 12.32 | 3083563  | 14.12 | 1.67 | MI |
| 10.977 | 10.942 | 11.025 | TIC 1468361  | 3.51  | 926689   | 4.24  | 1.58 | MI |
| 11.078 | 11.042 | 11.150 | TIC 1545411  | 3.69  | 934374   | 4.28  | 1.65 | MI |

**(3) MS spectra of the involved compounds:**

**Retention Time: ~5.4 or 6.0 min (1j, MW 122)**

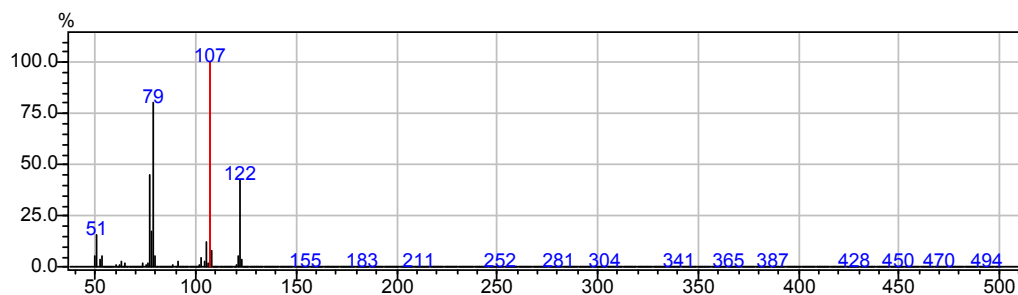

**Retention Time: ~6.5 or 7.1 min (catalyst, MW 184, 186)**

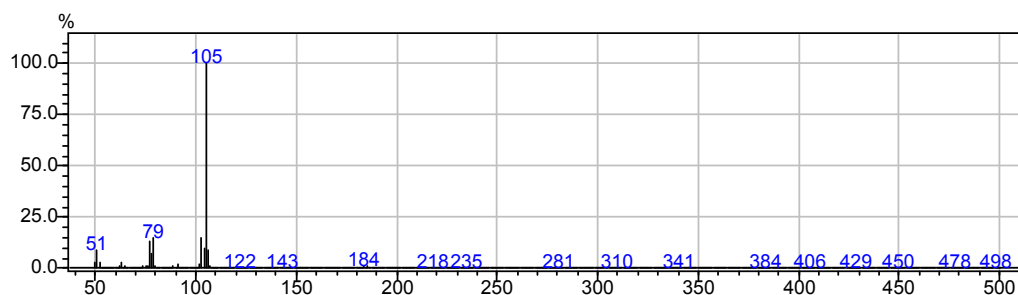

**Retention Time: ~10.32 or 10.98 min (isomers of 2j, MW 226)**

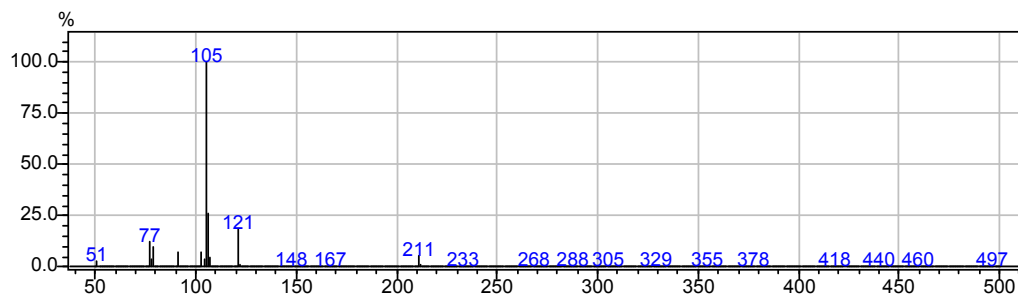

**Retention Time: ~10.41 or 11.08 min (isomers of 2j, MW 226)**

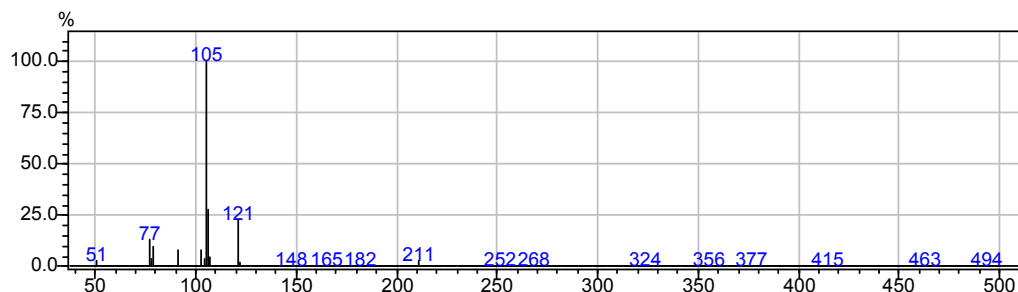

# $^1\text{H}$ and $^{13}\text{C}$ NMR Spectra of the Products

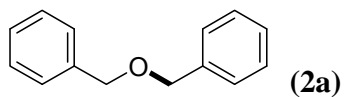

## $^1\text{H}$ NMR

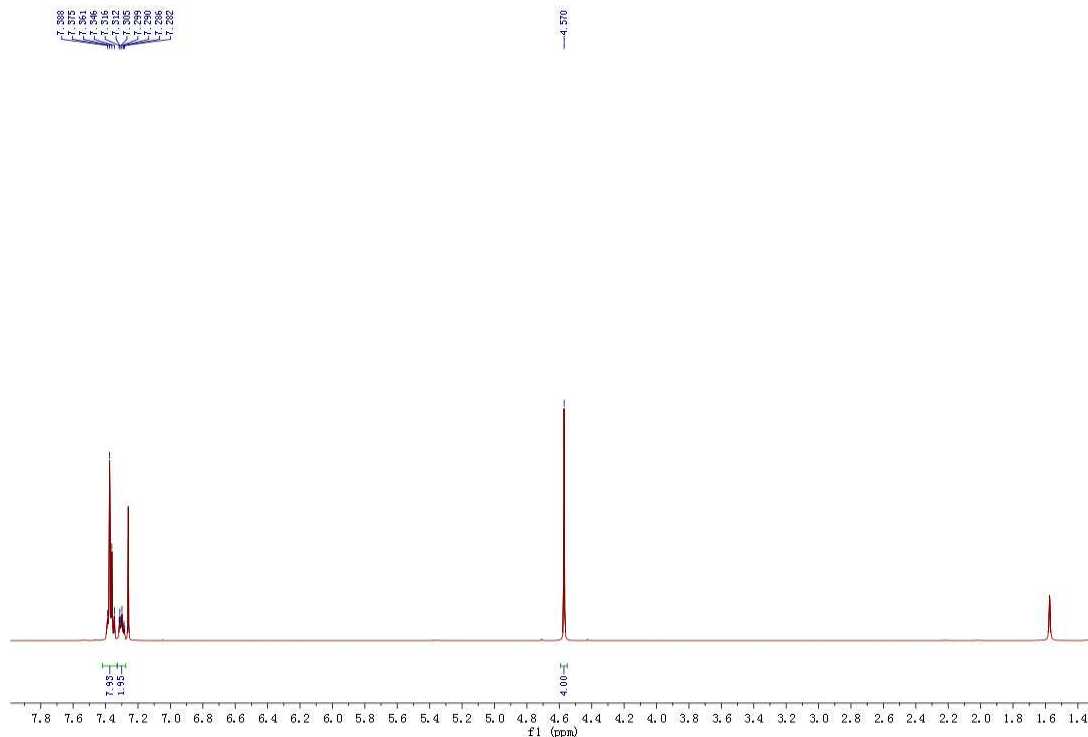

## $^{13}\text{C}$ NMR

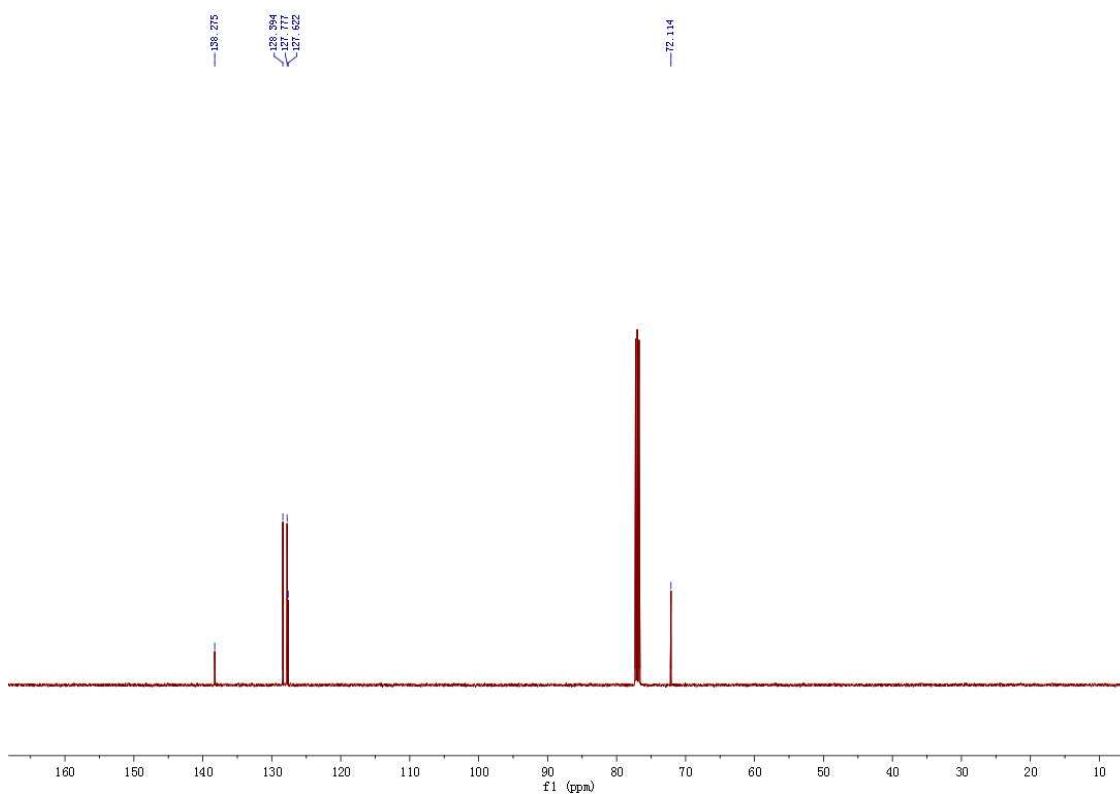



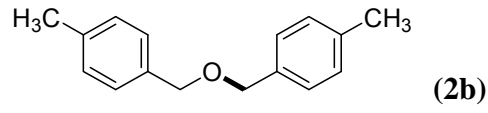

### <sup>1</sup>H NMR

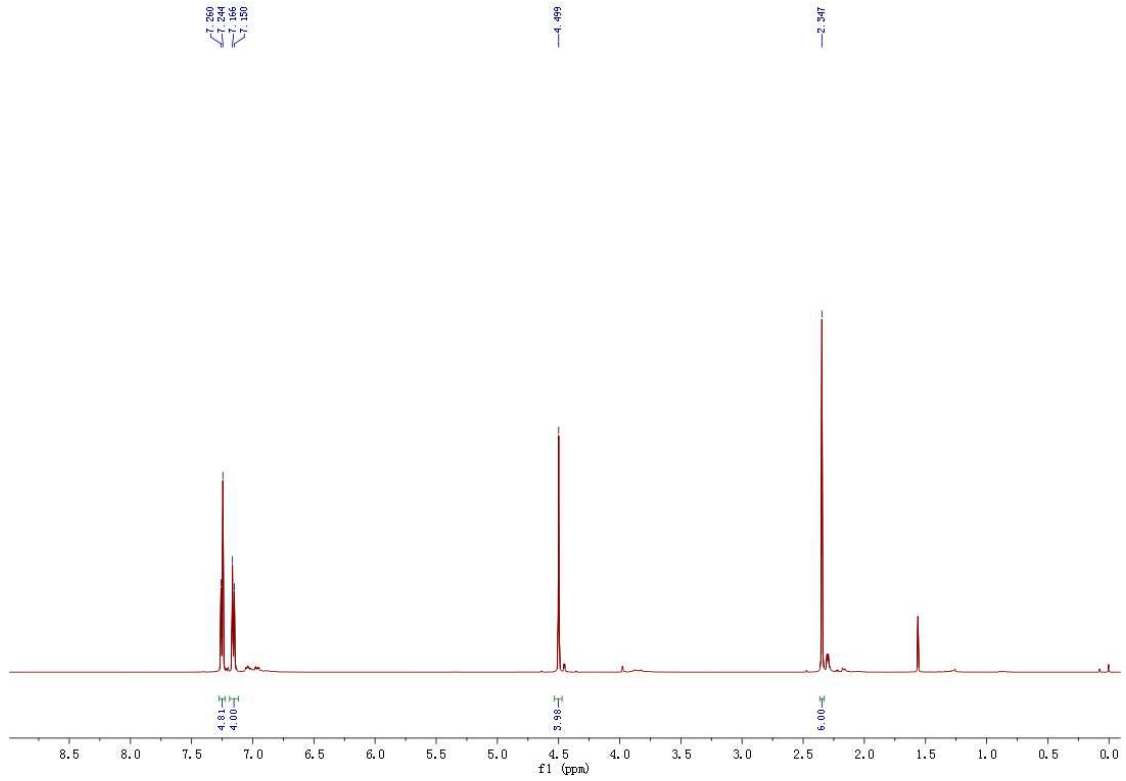

### <sup>13</sup>C NMR

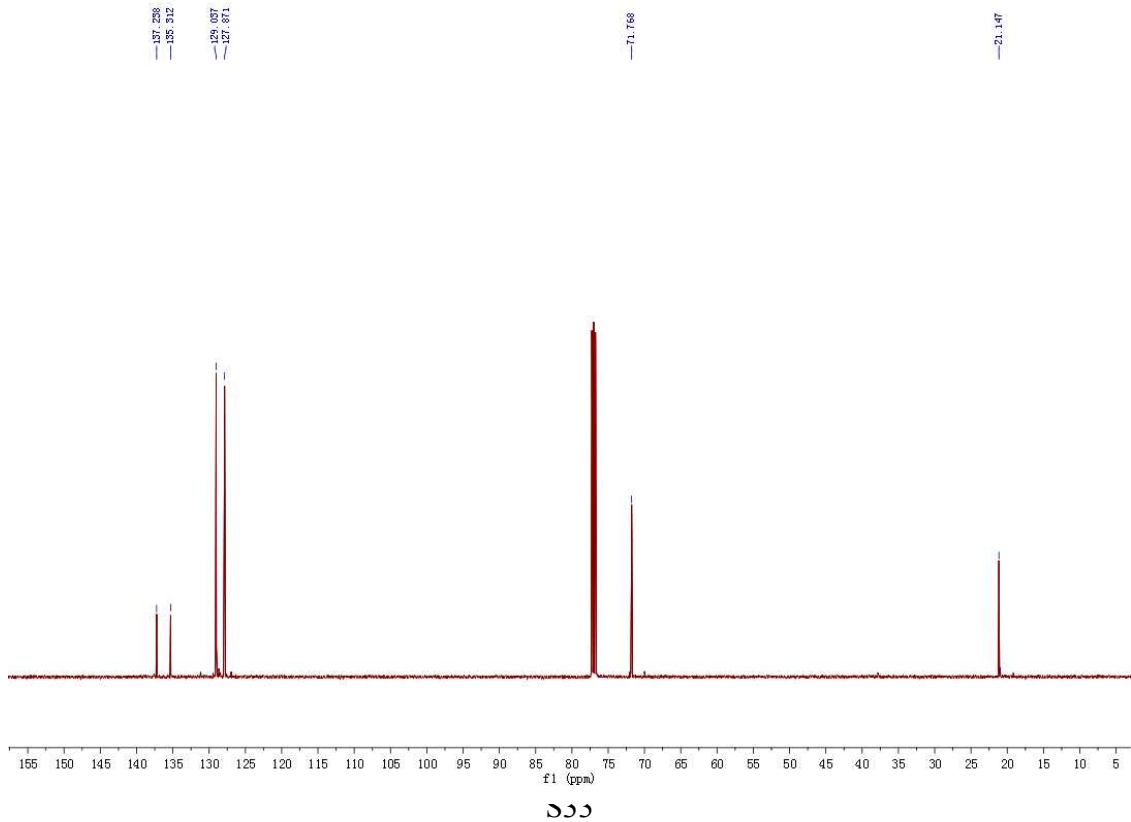

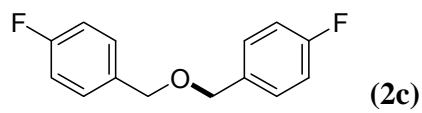

### <sup>1</sup>H NMR

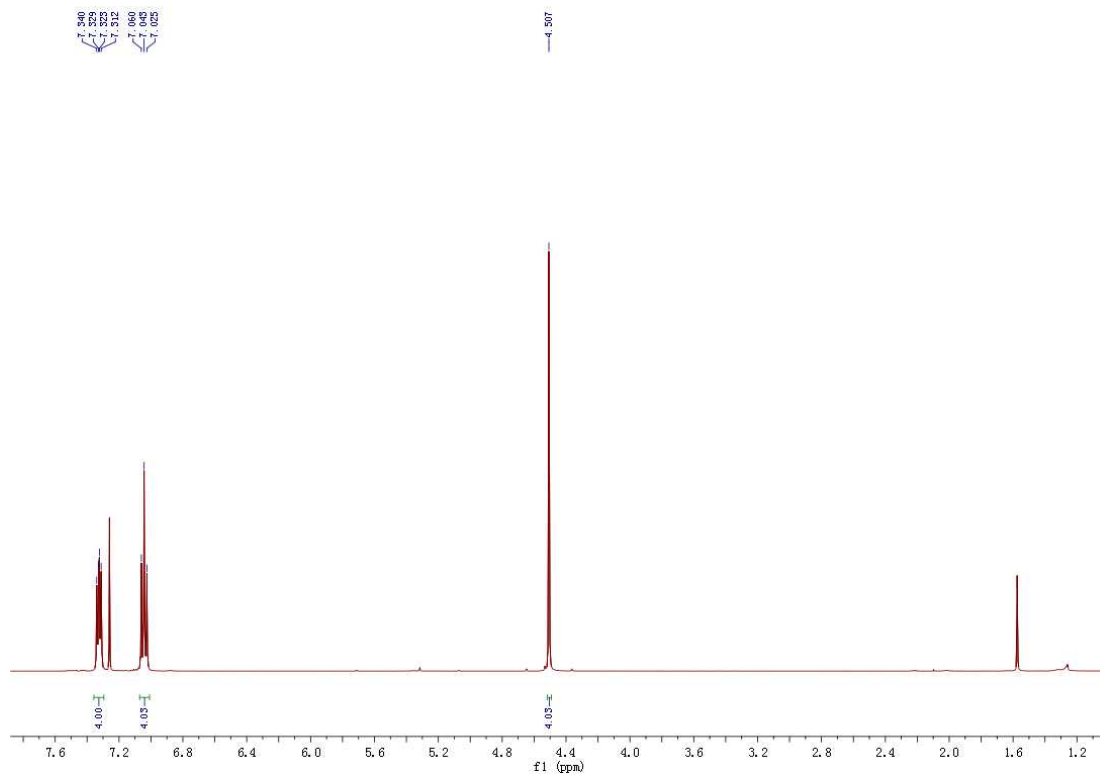

### <sup>13</sup>C NMR

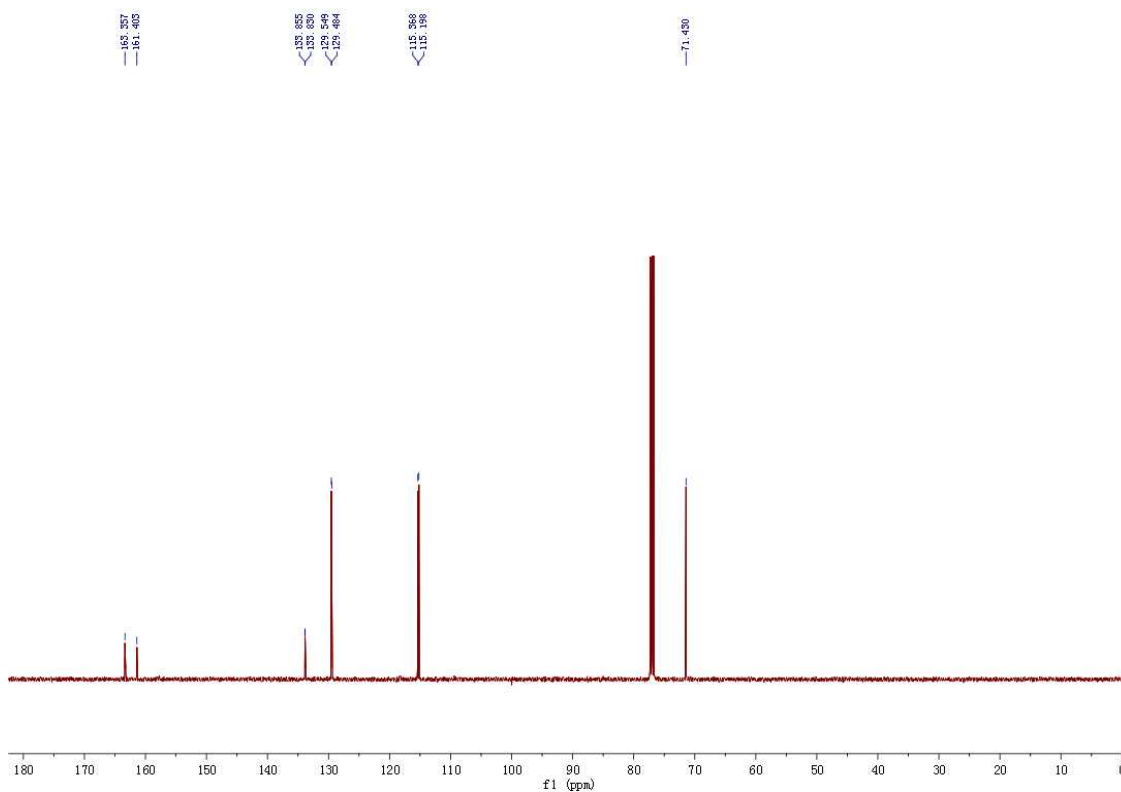

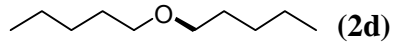

<sup>1</sup>H NMR

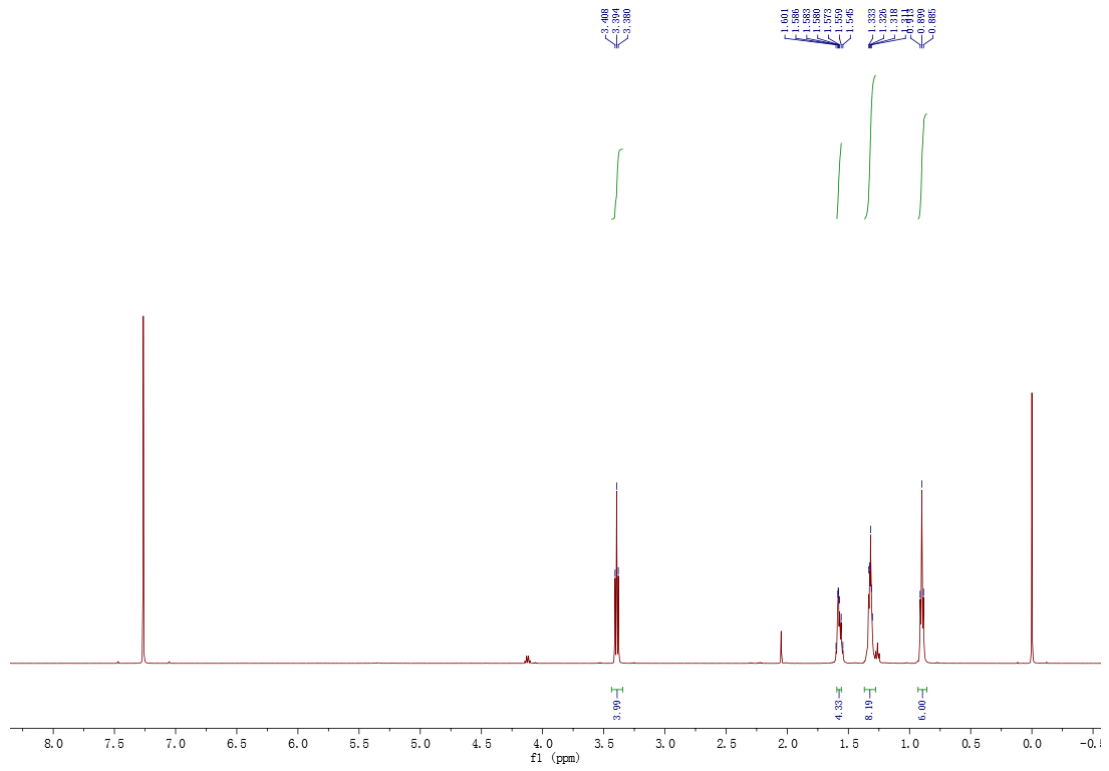

<sup>13</sup>C NMR

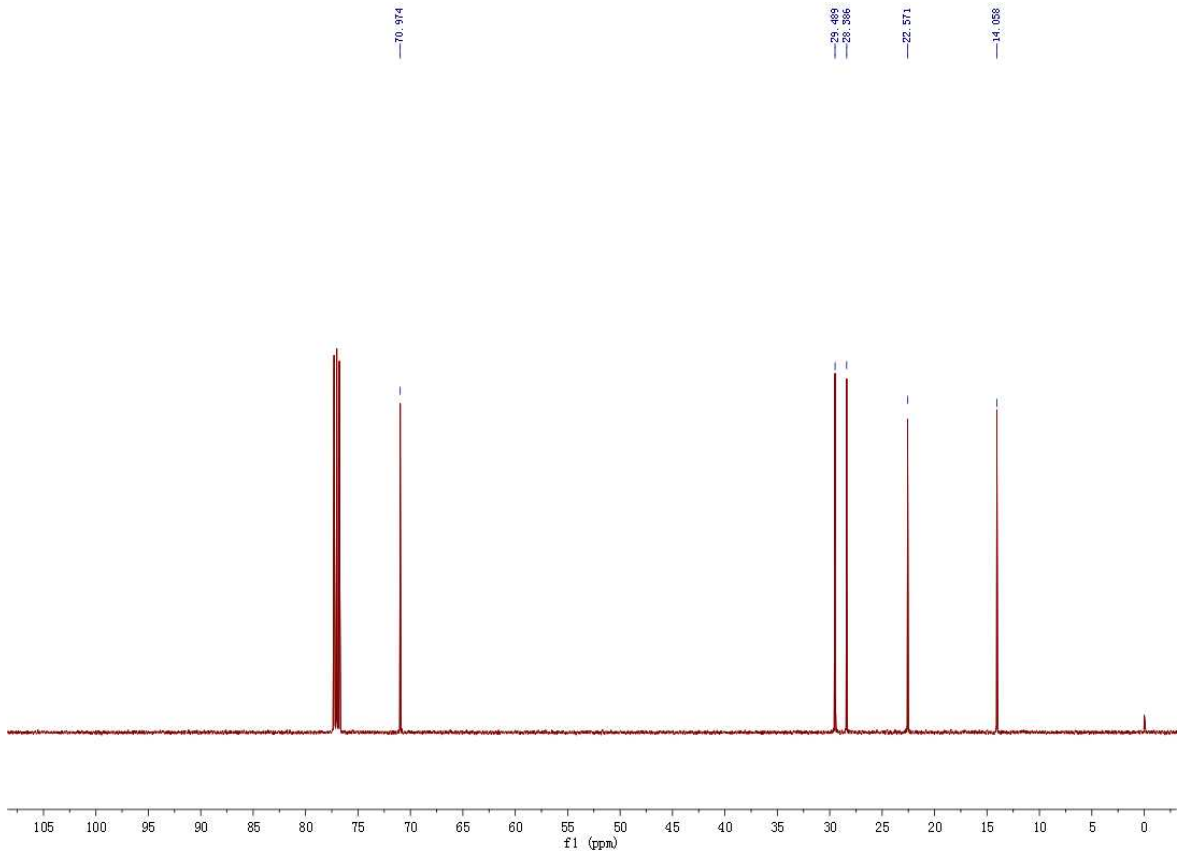

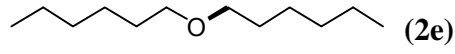

**<sup>1</sup>H NMR**

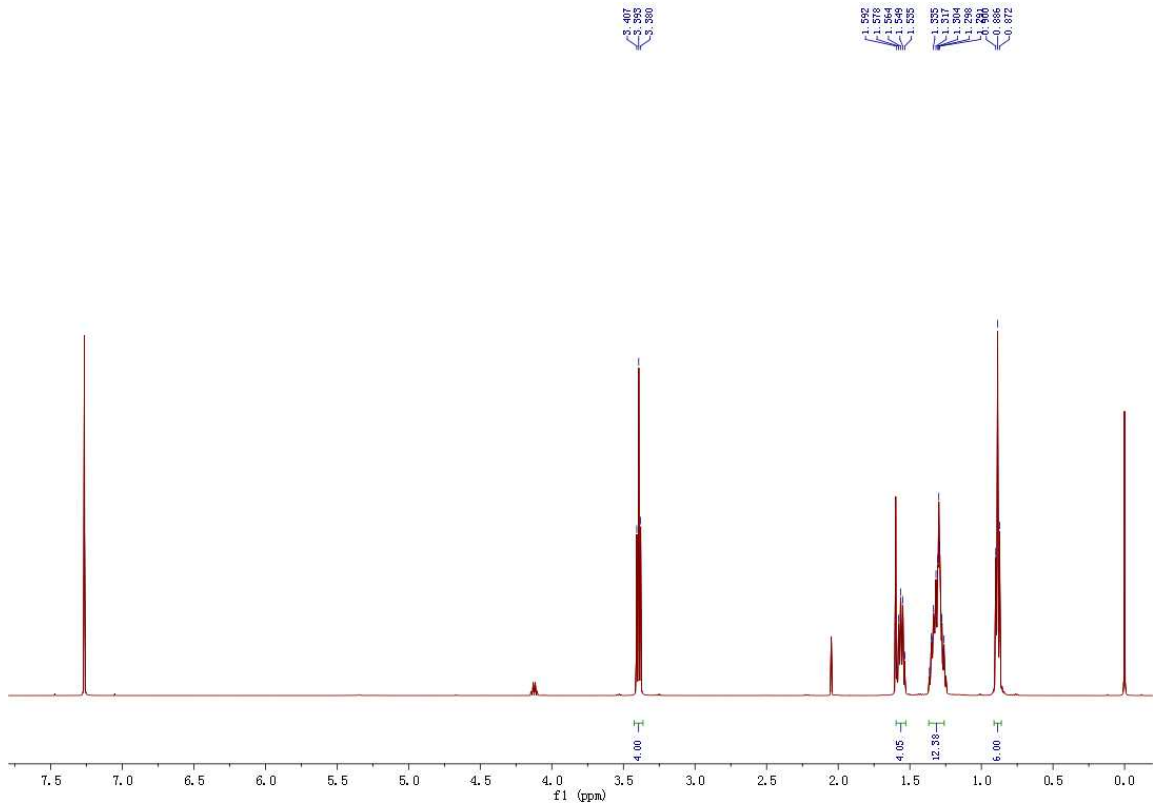

**<sup>13</sup>C NMR**

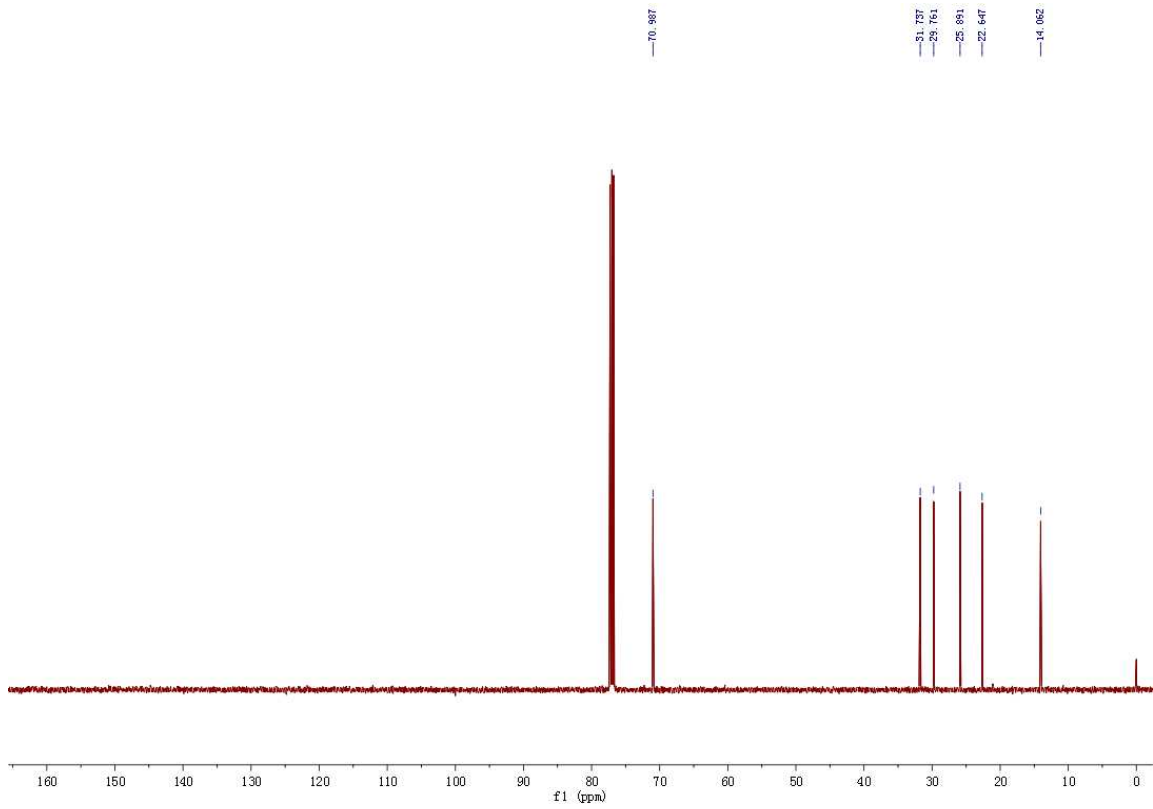

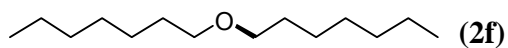

<sup>1</sup>H NMR

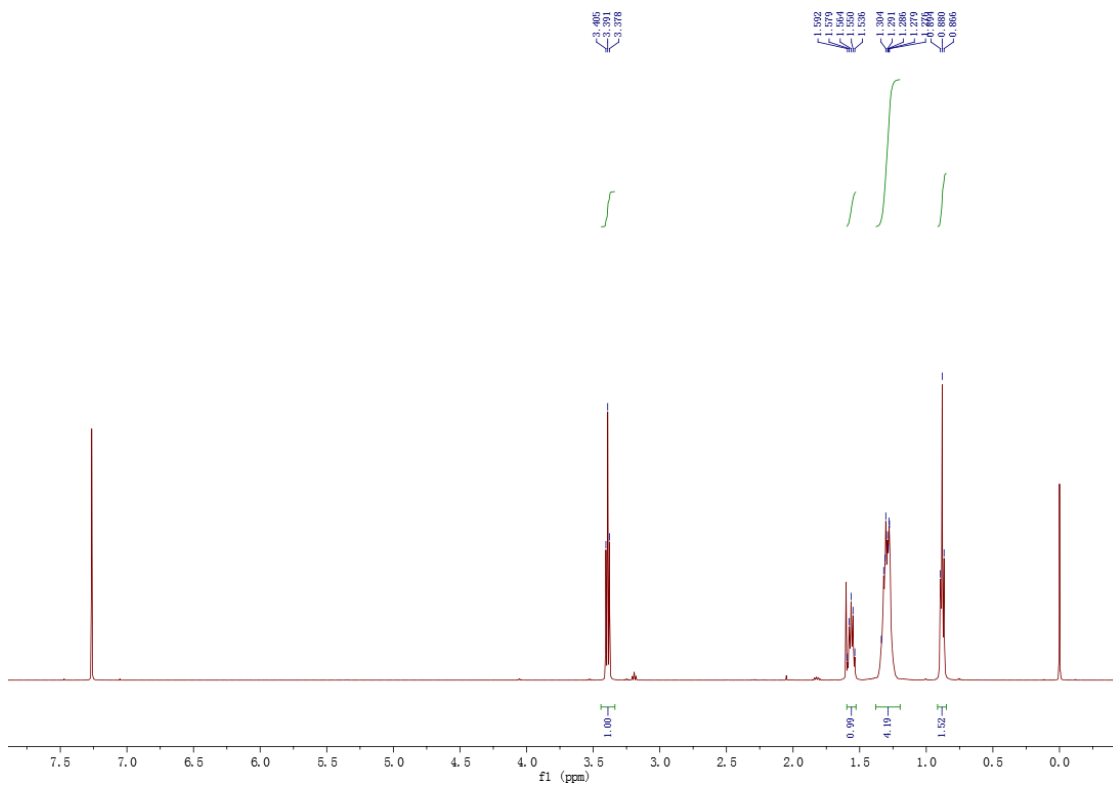

<sup>13</sup>C NMR

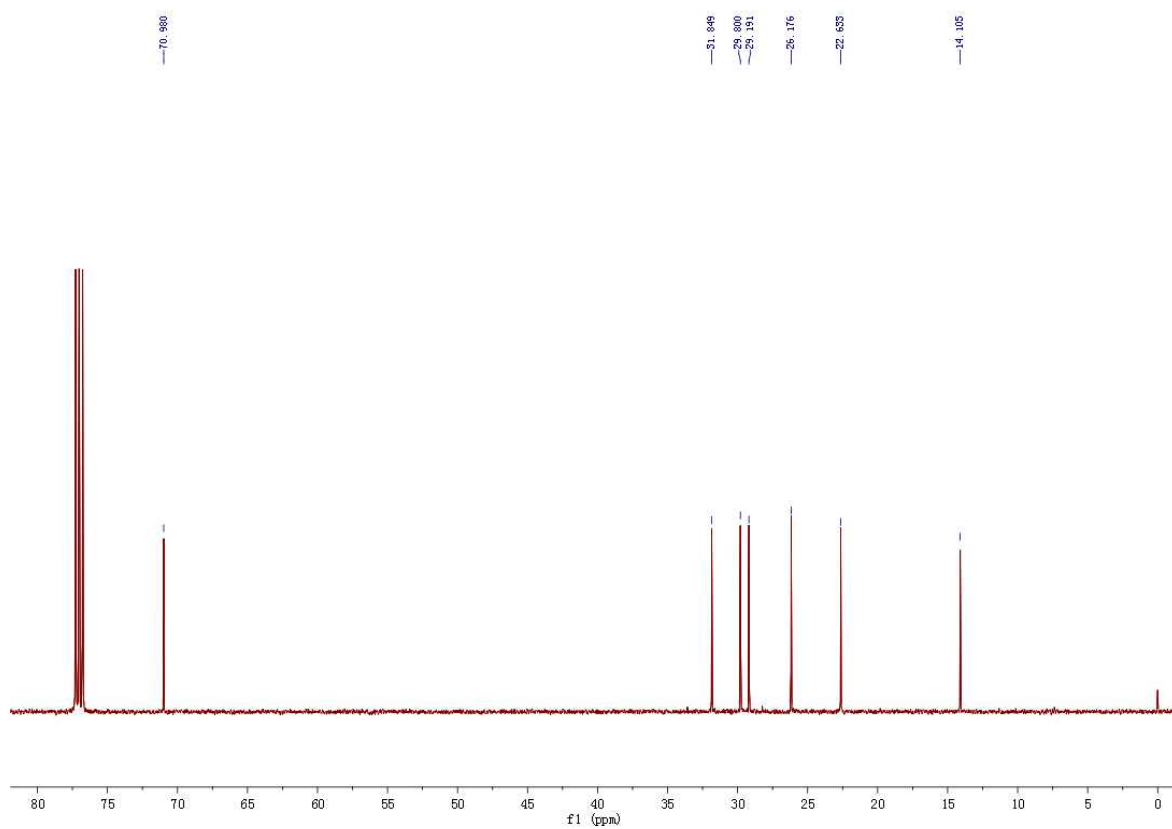

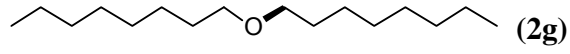

<sup>1</sup>H NMR

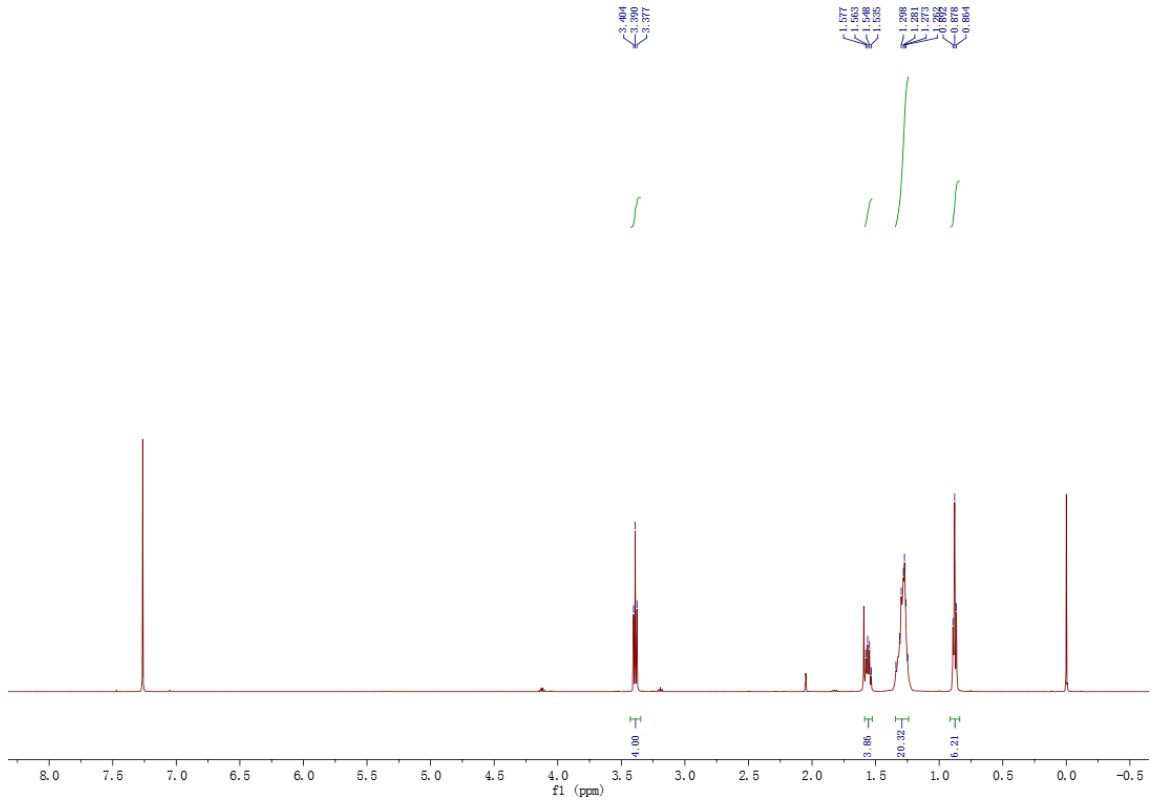

<sup>13</sup>C NMR

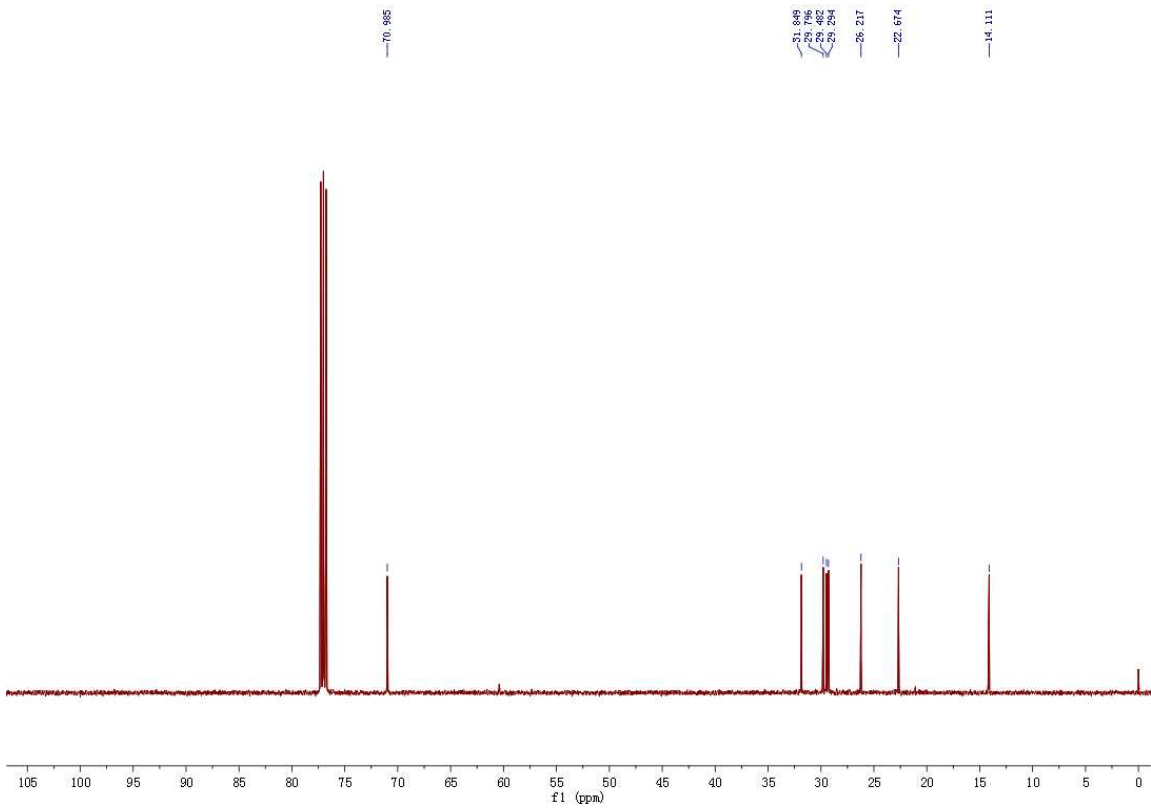

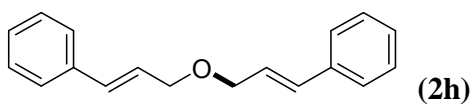

<sup>1</sup>H NMR

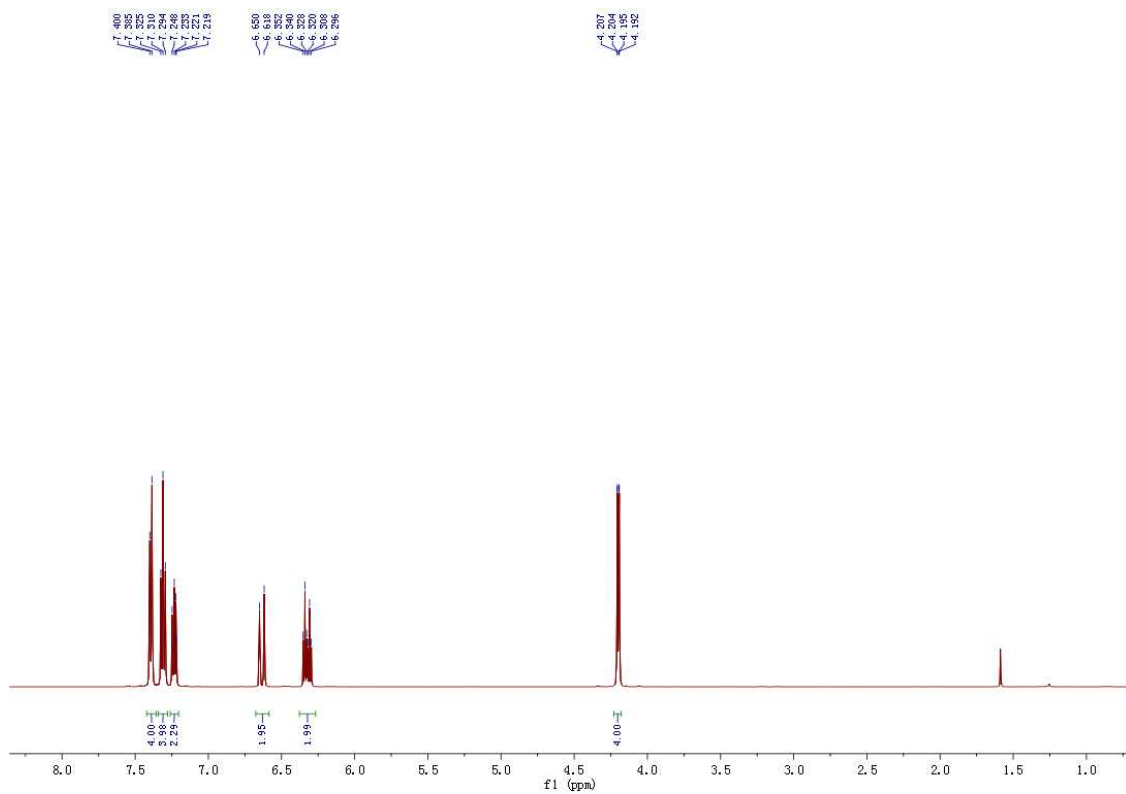

<sup>13</sup>C NMR

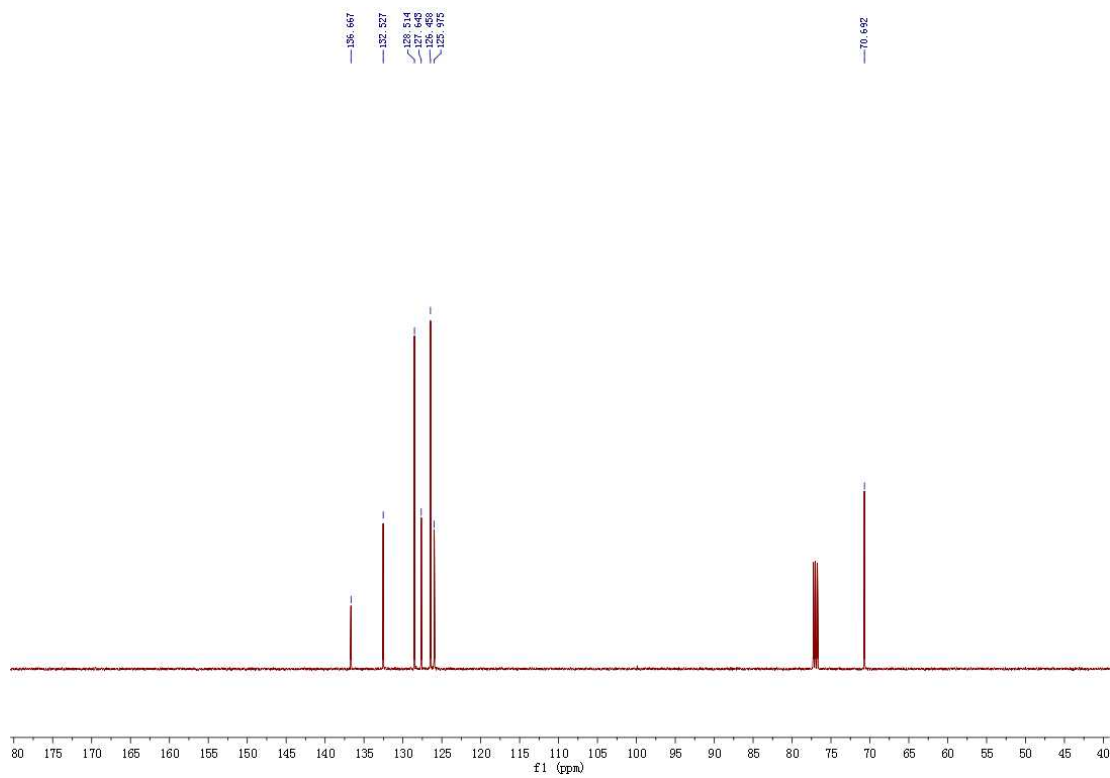

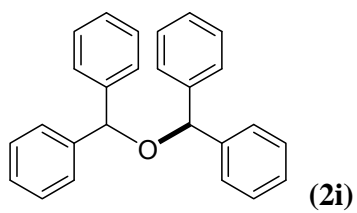

<sup>1</sup>H NMR

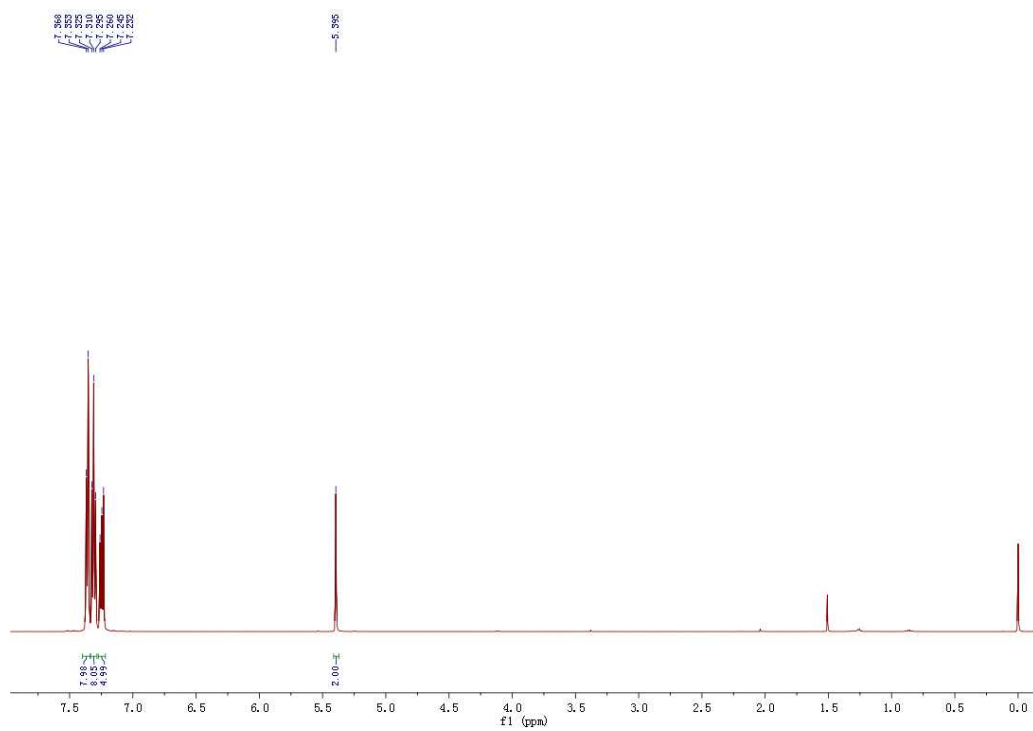

<sup>13</sup>C NMR

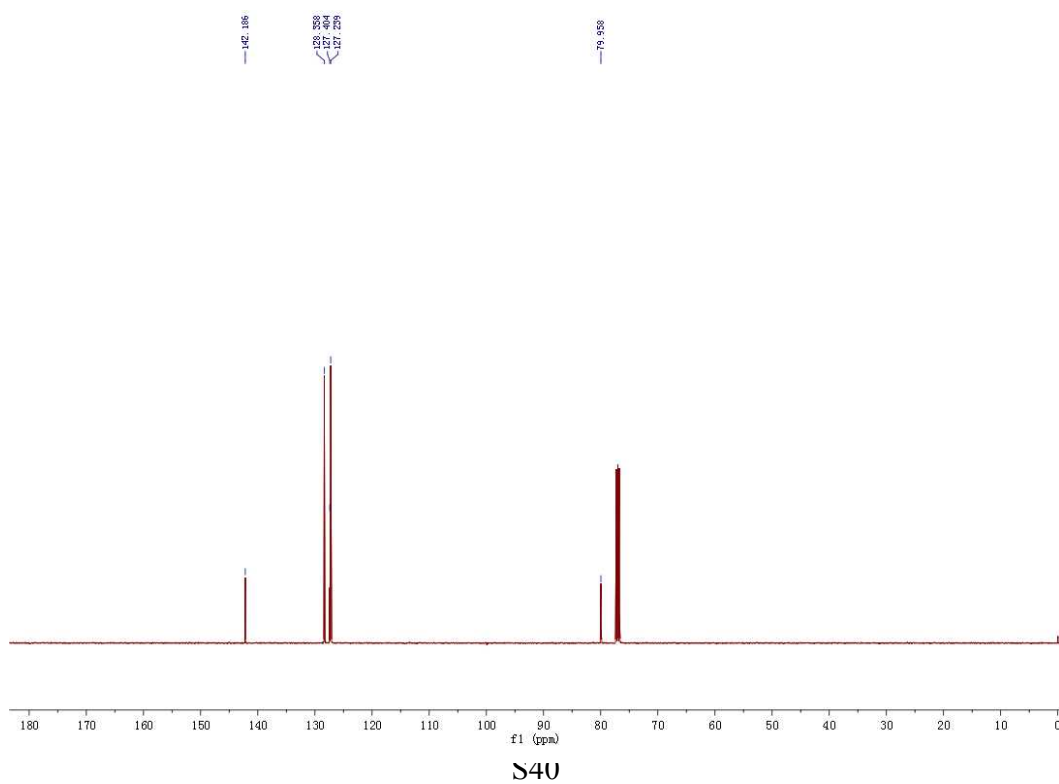





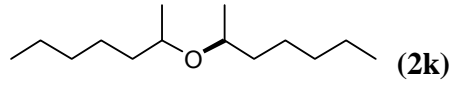

<sup>1</sup>H NMR

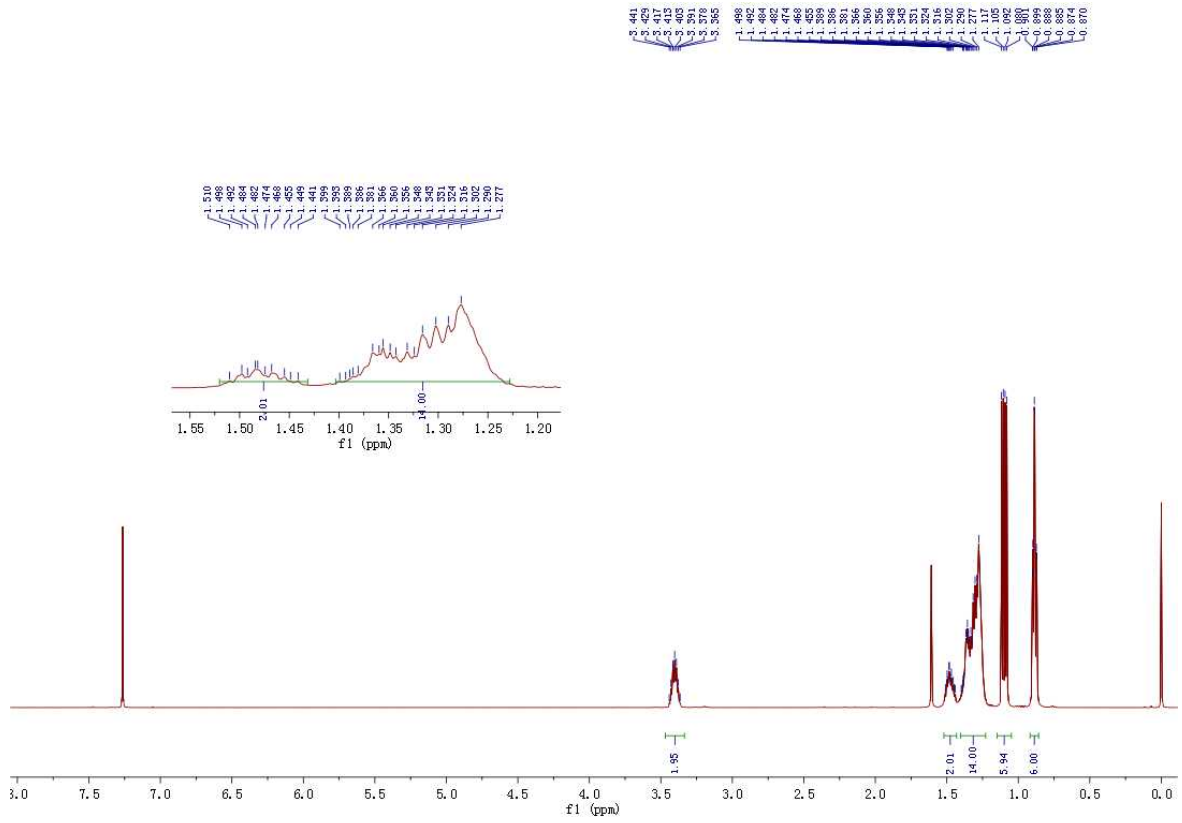

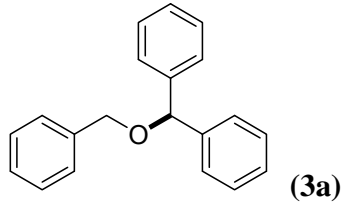

<sup>1</sup>H NMR

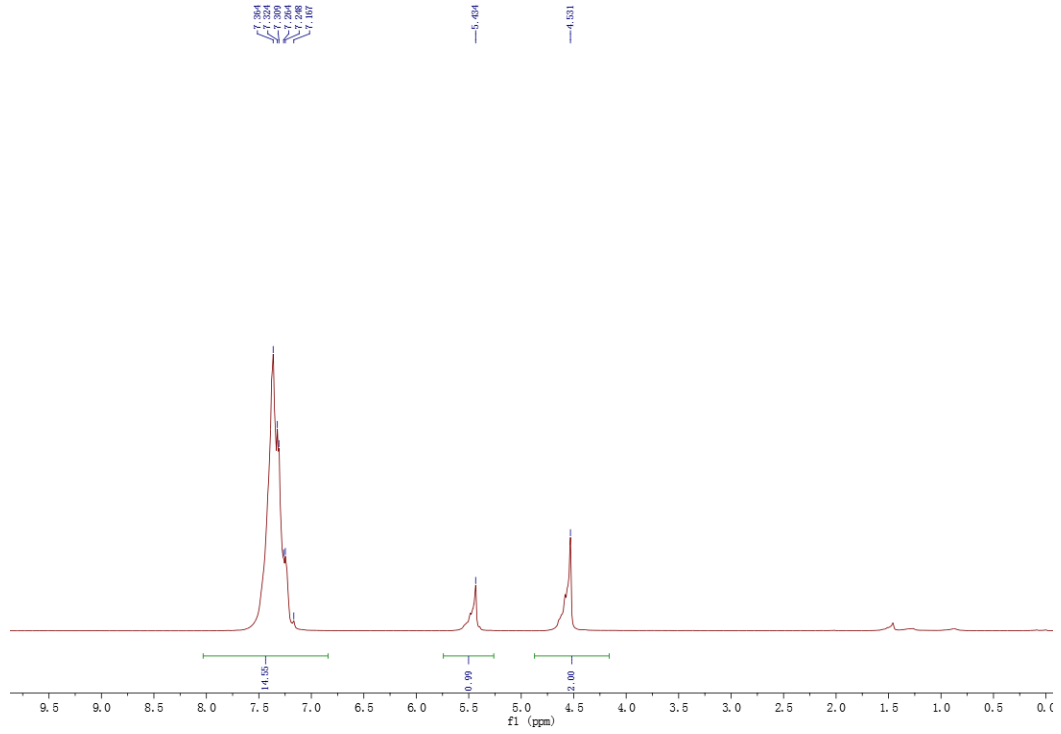

<sup>13</sup>C NMR

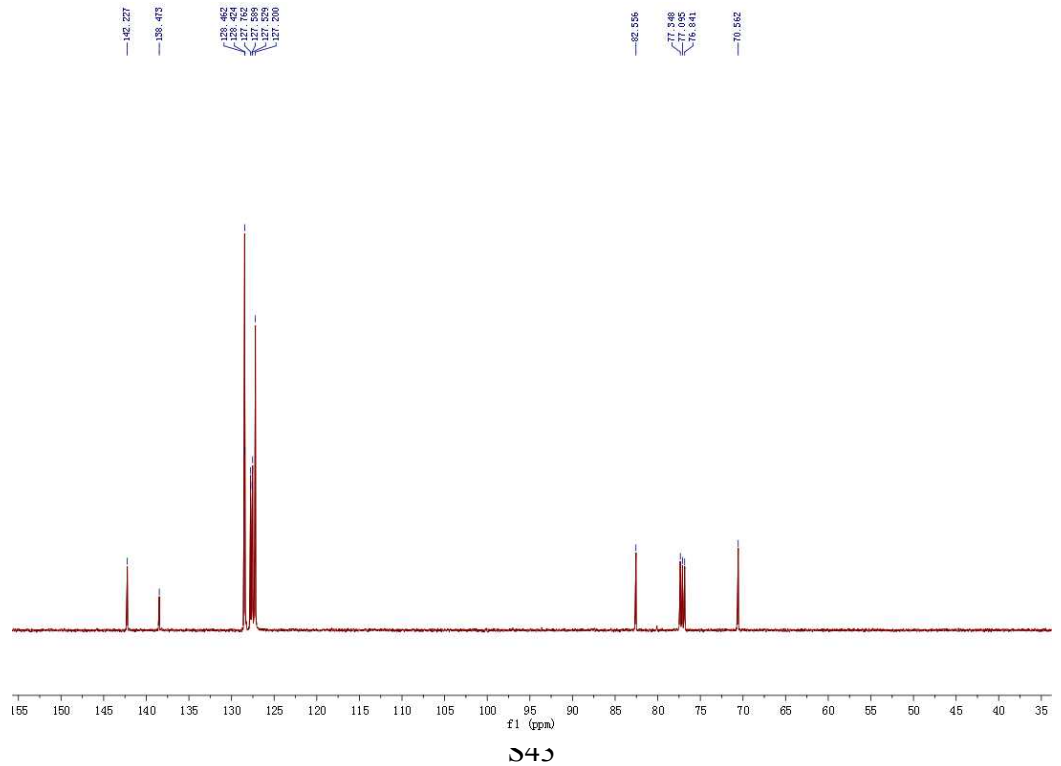

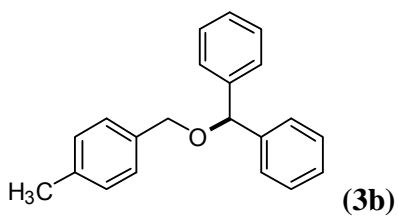

**<sup>1</sup>H NMR**

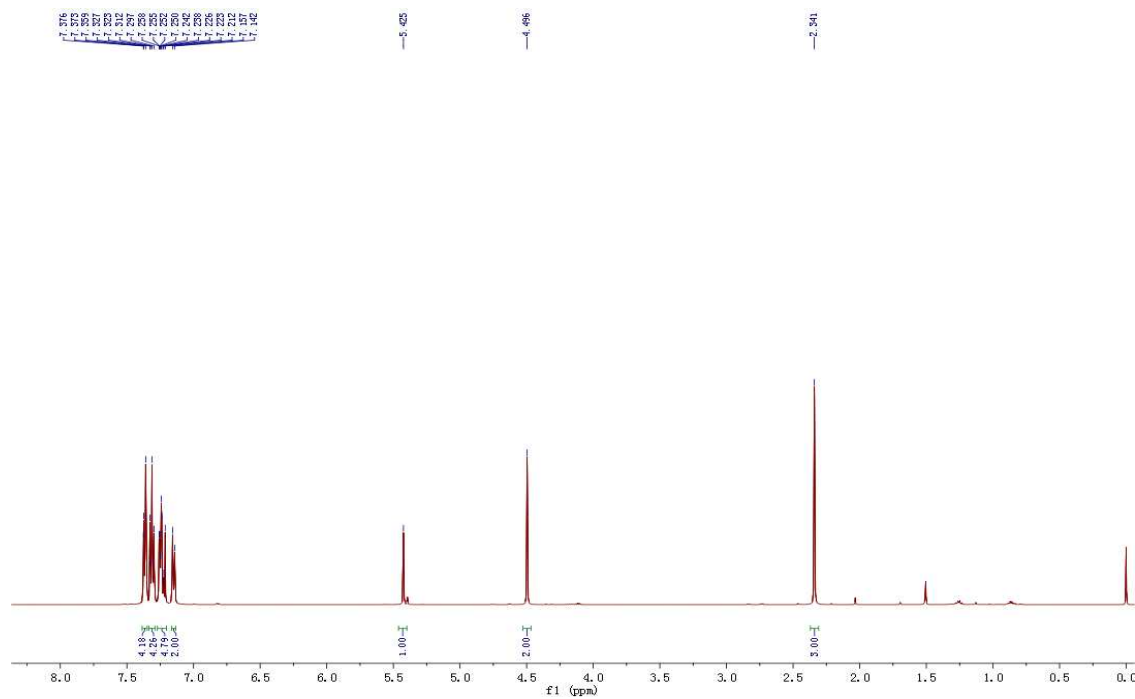

**<sup>13</sup>C NMR**

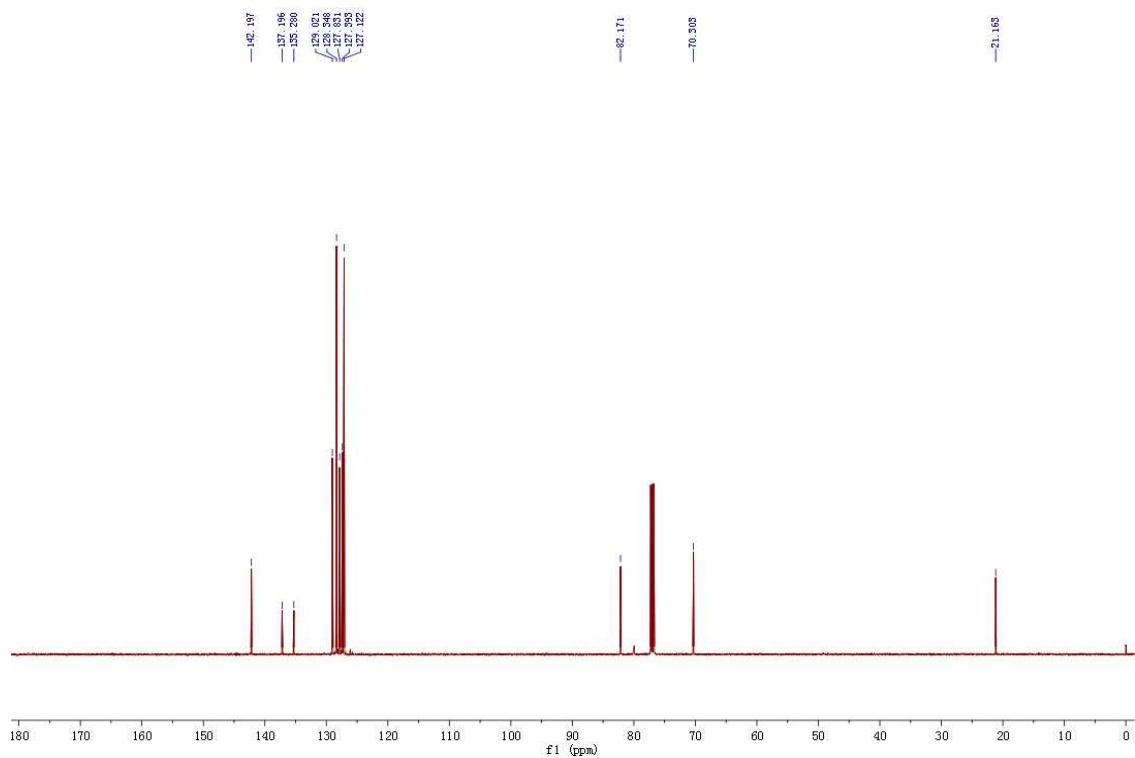

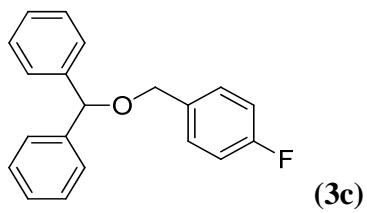

<sup>1</sup>H NMR

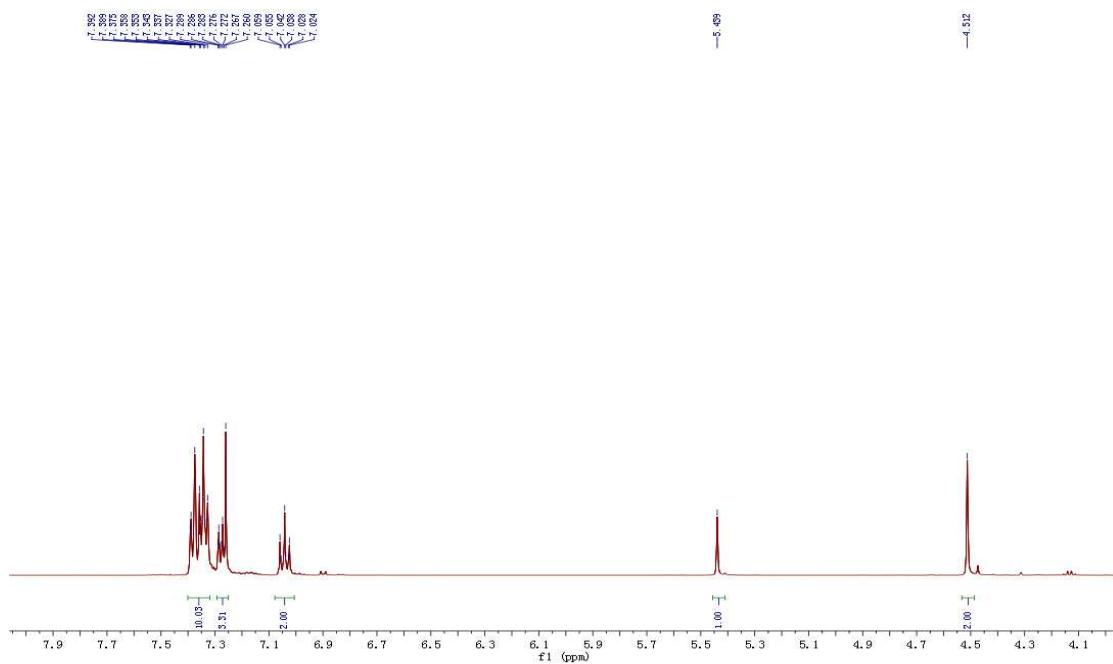

<sup>13</sup>C NMR

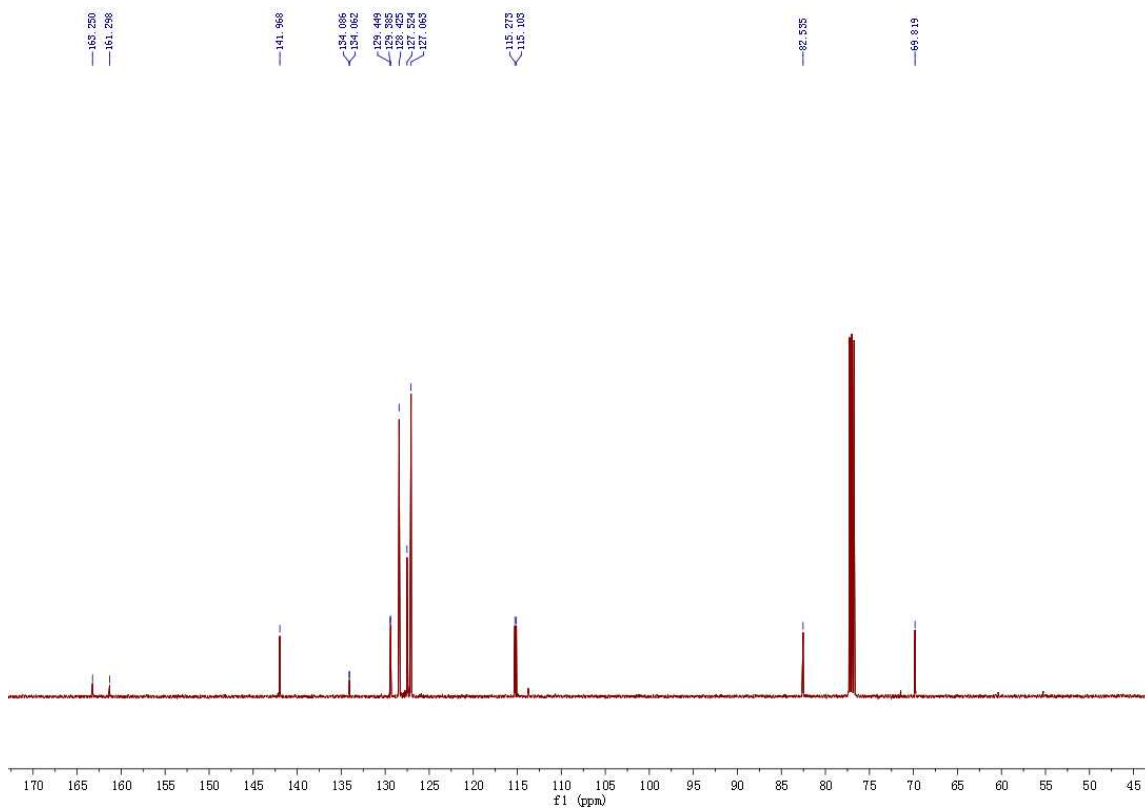



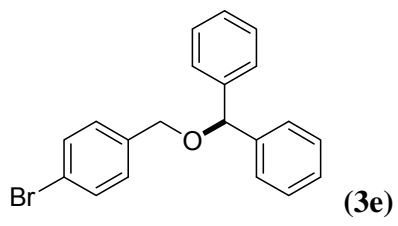

**<sup>1</sup>H NMR**

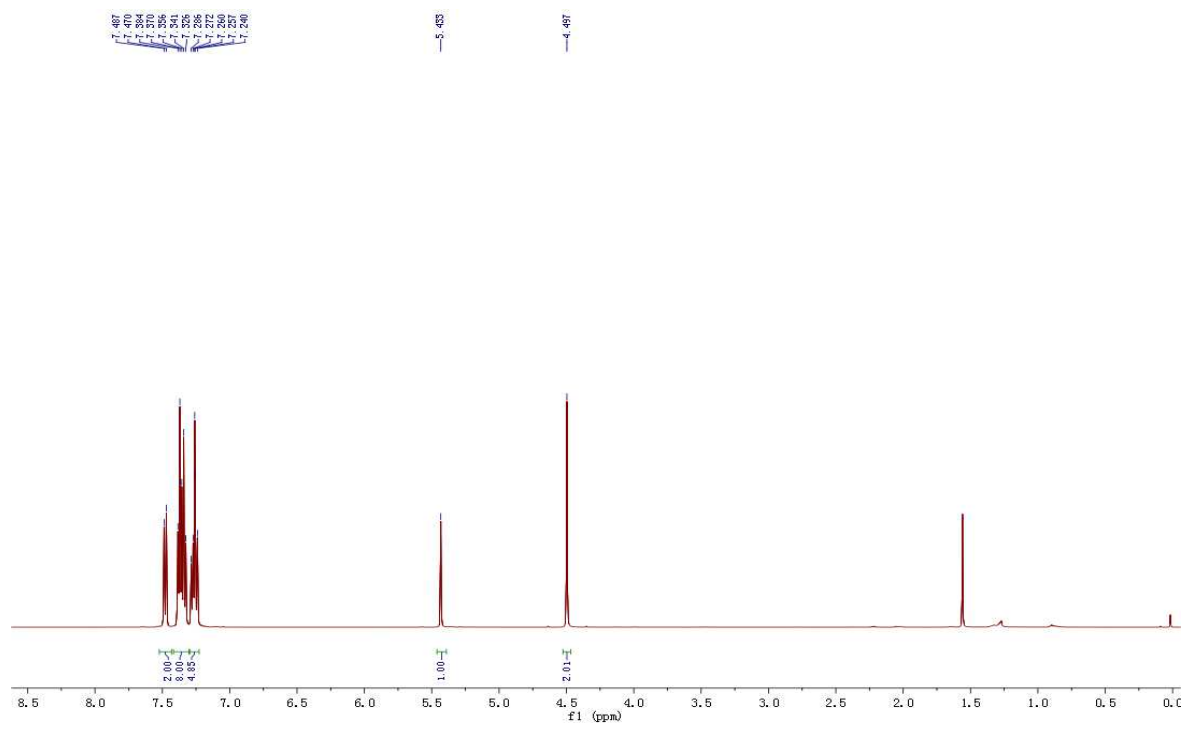

**<sup>13</sup>C NMR**

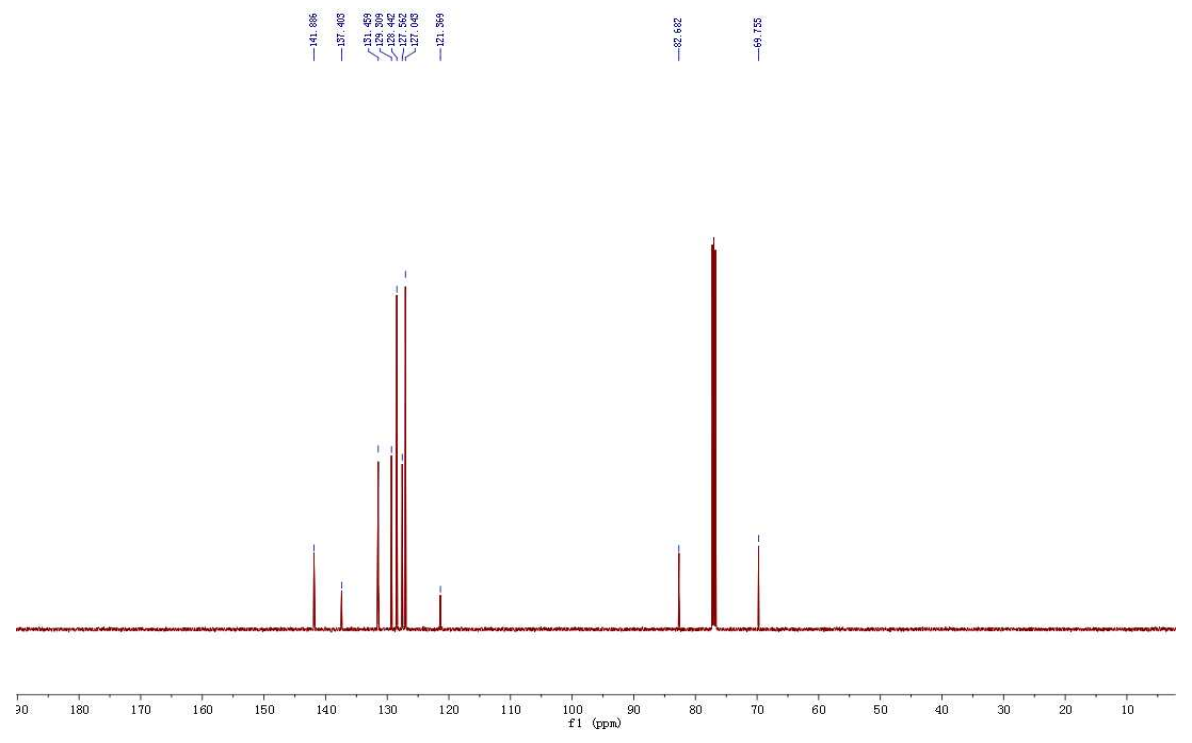

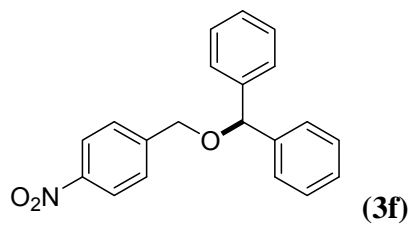

<sup>1</sup>H NMR

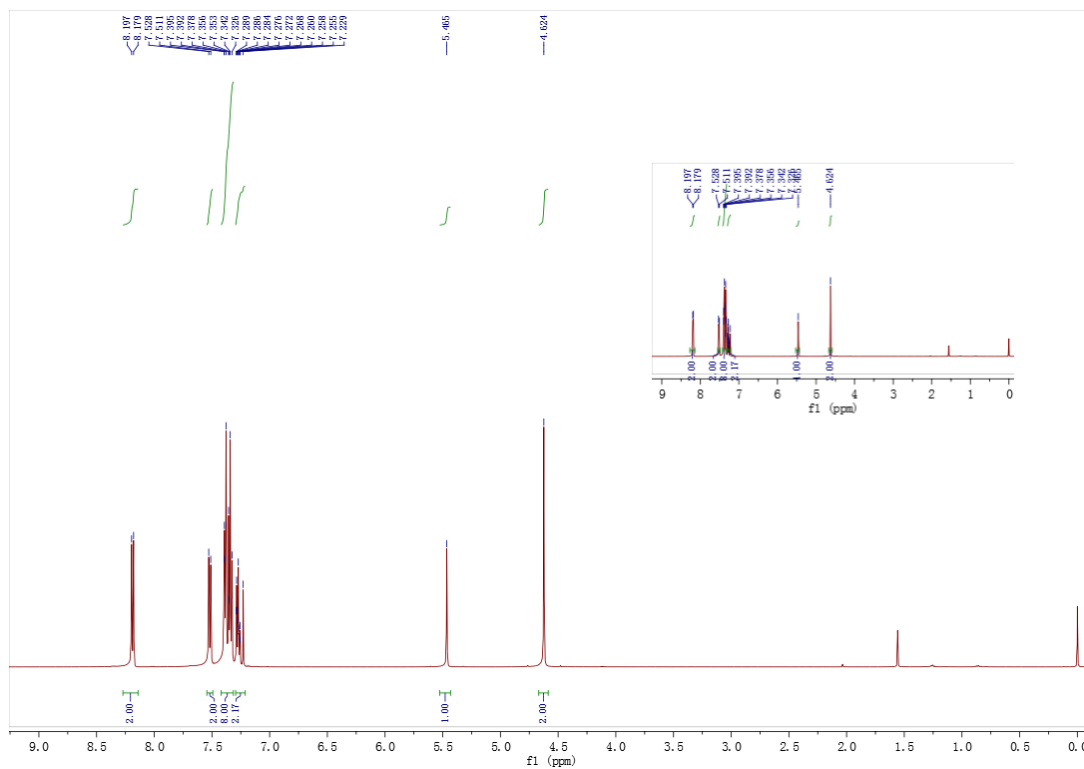

<sup>13</sup>C NMR

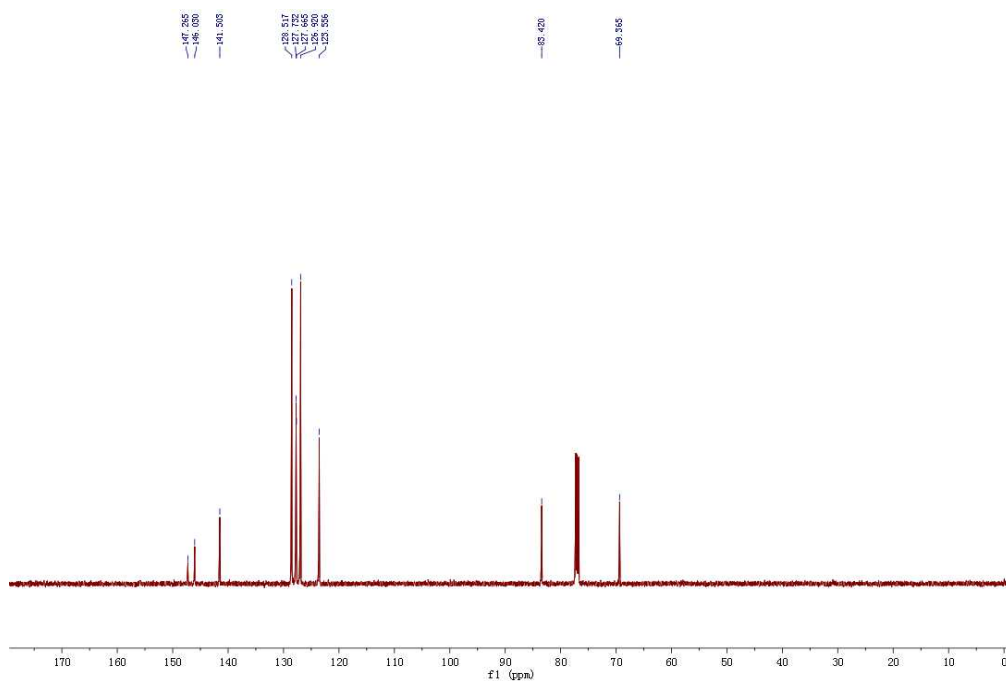



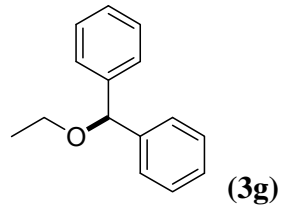

<sup>1</sup>H NMR

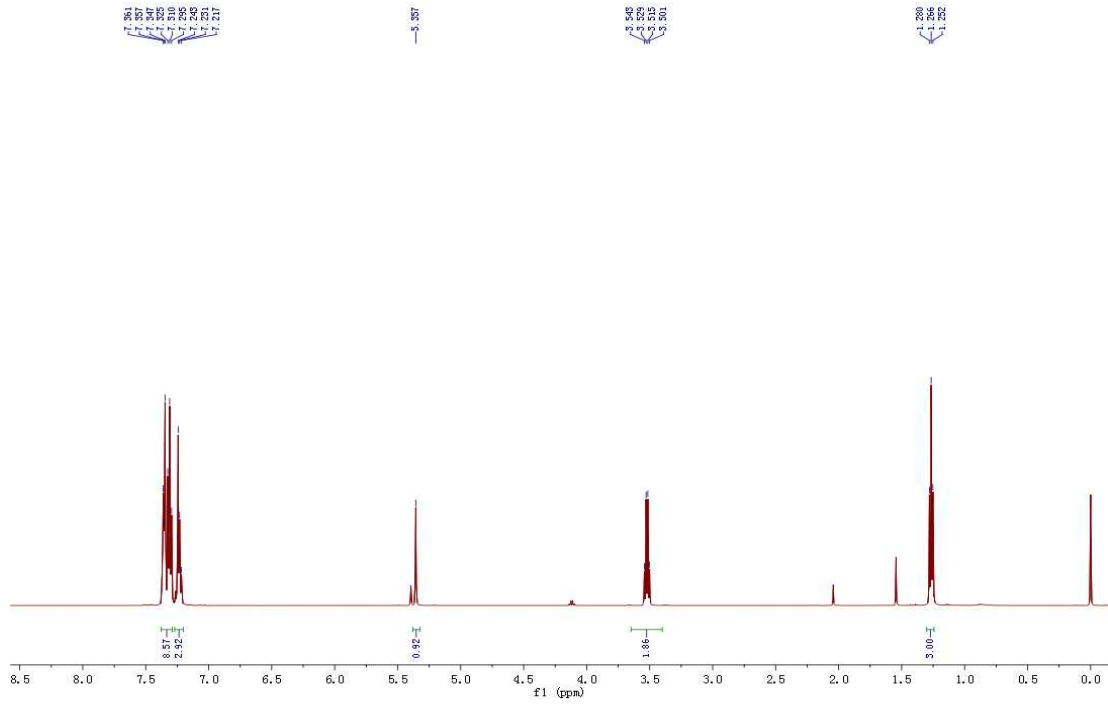

<sup>13</sup>C NMR

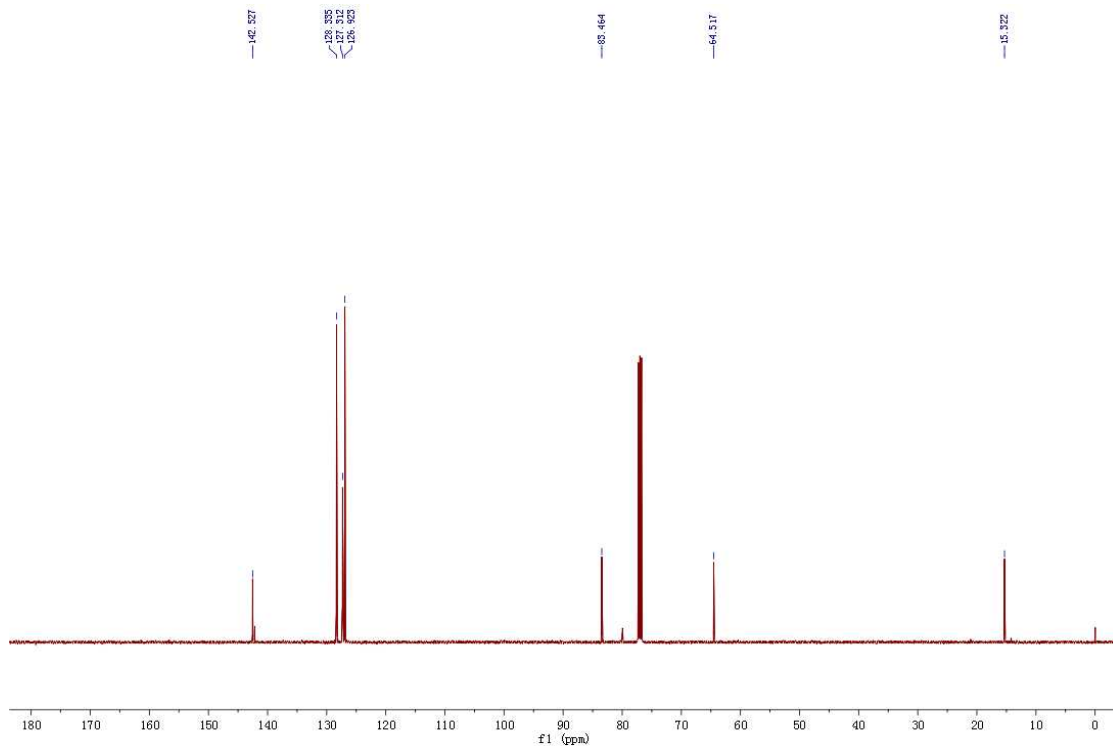

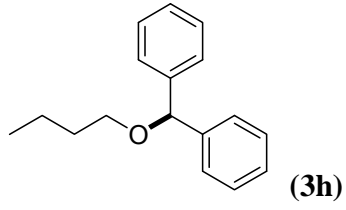

<sup>1</sup>H NMR

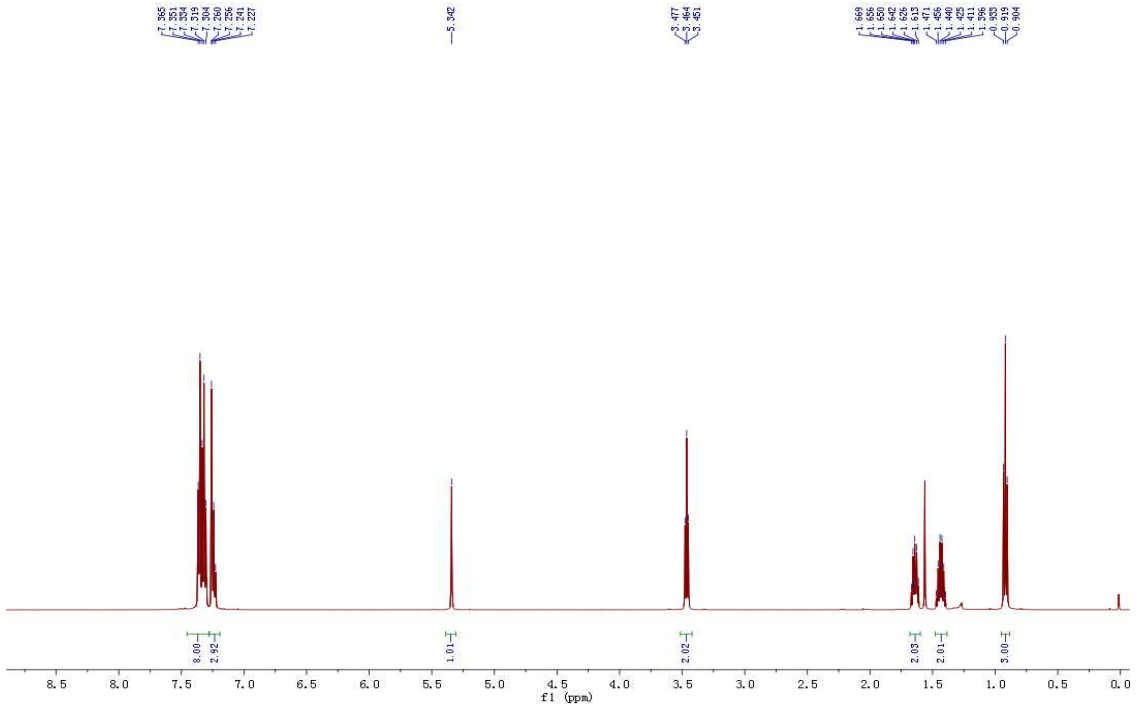

<sup>13</sup>C NMR

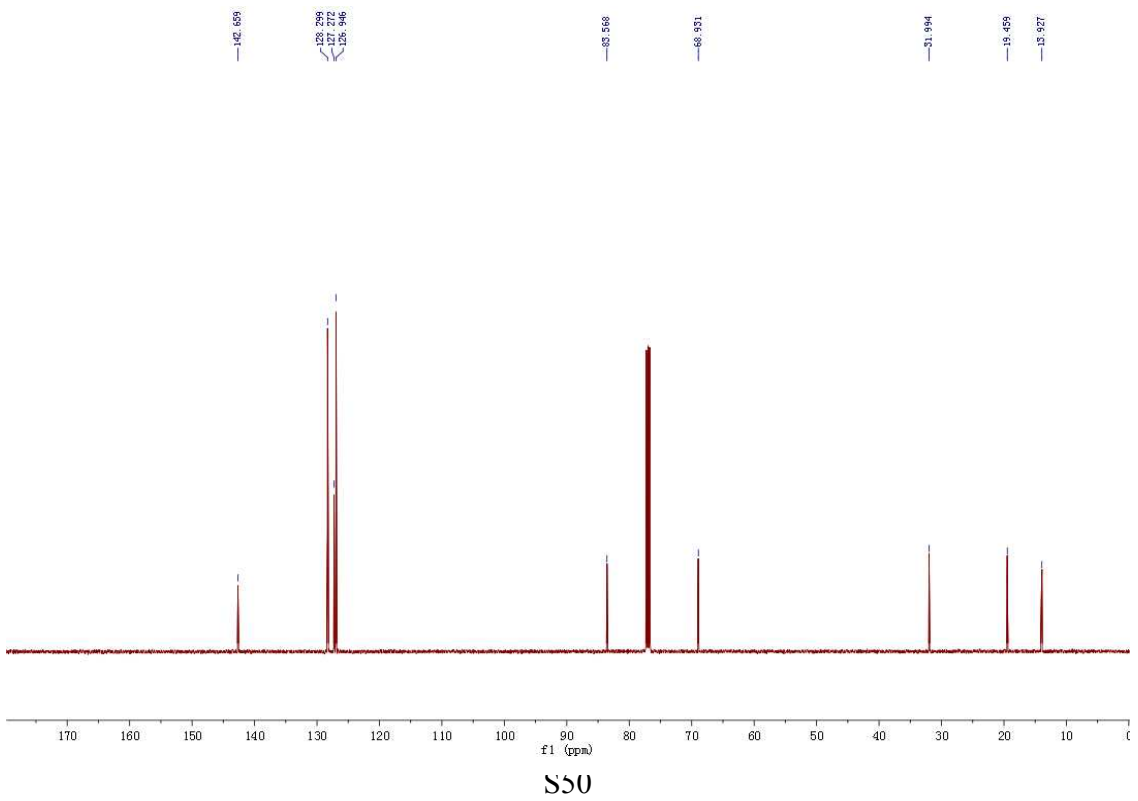

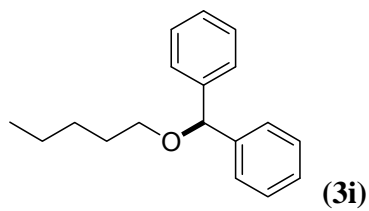

<sup>1</sup>H NMR

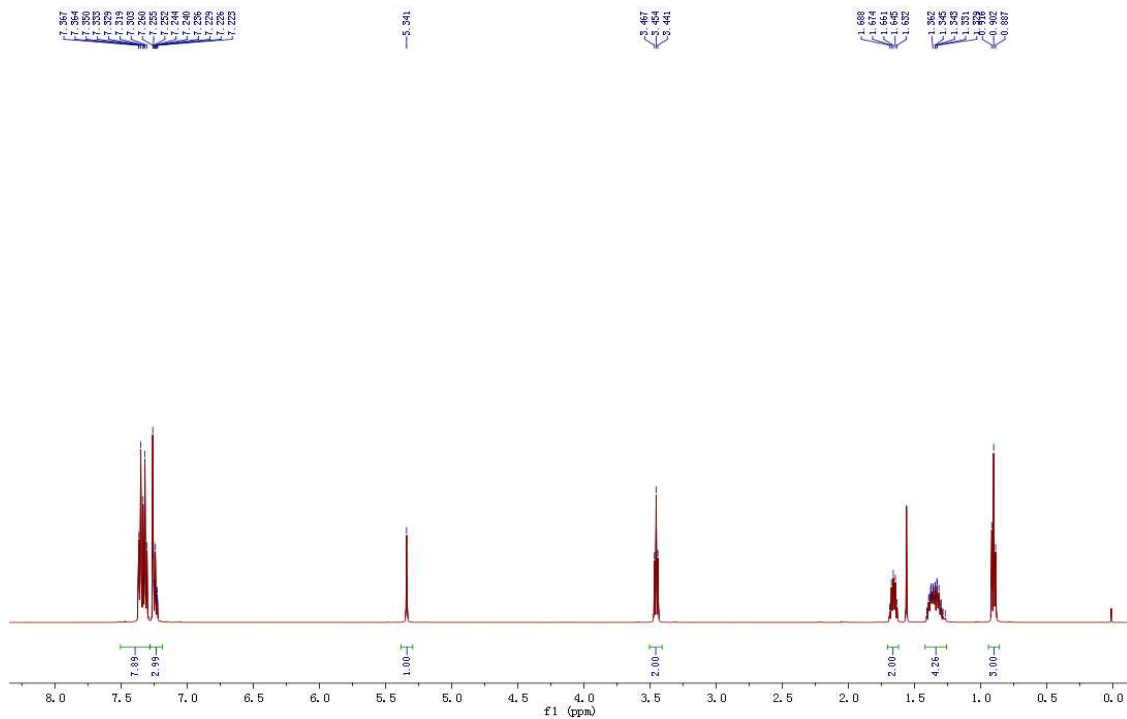

<sup>13</sup>C NMR

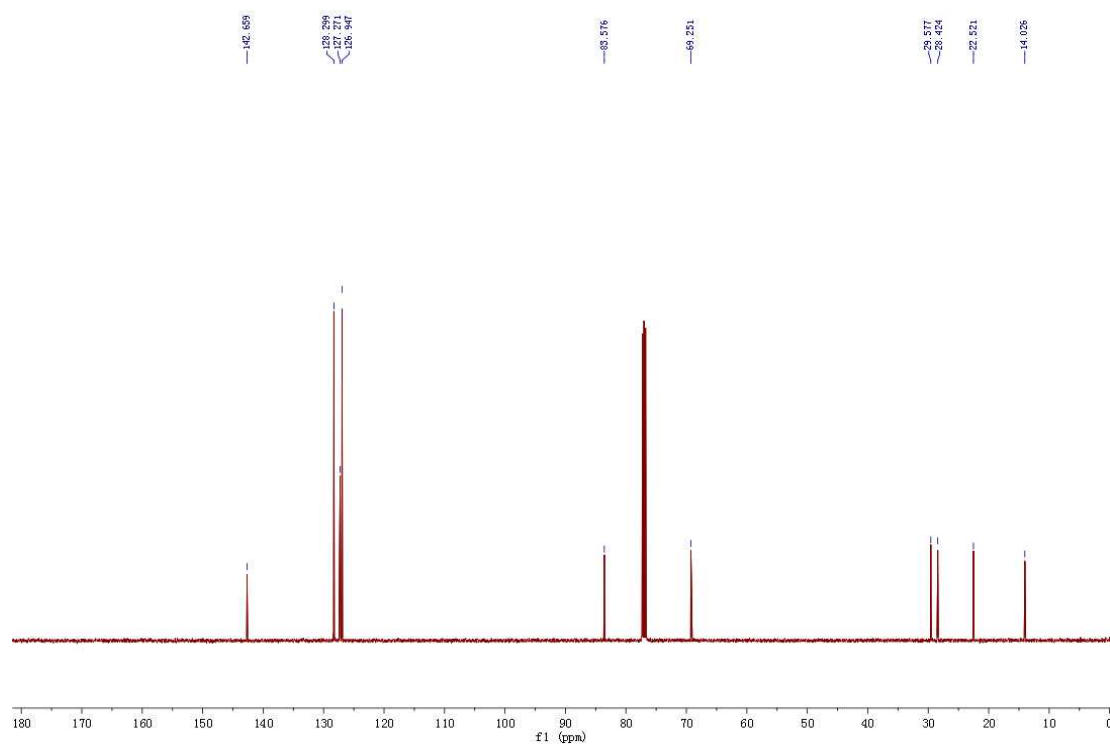

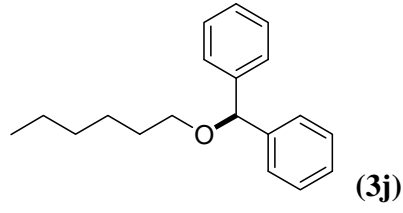

**<sup>1</sup>H NMR**

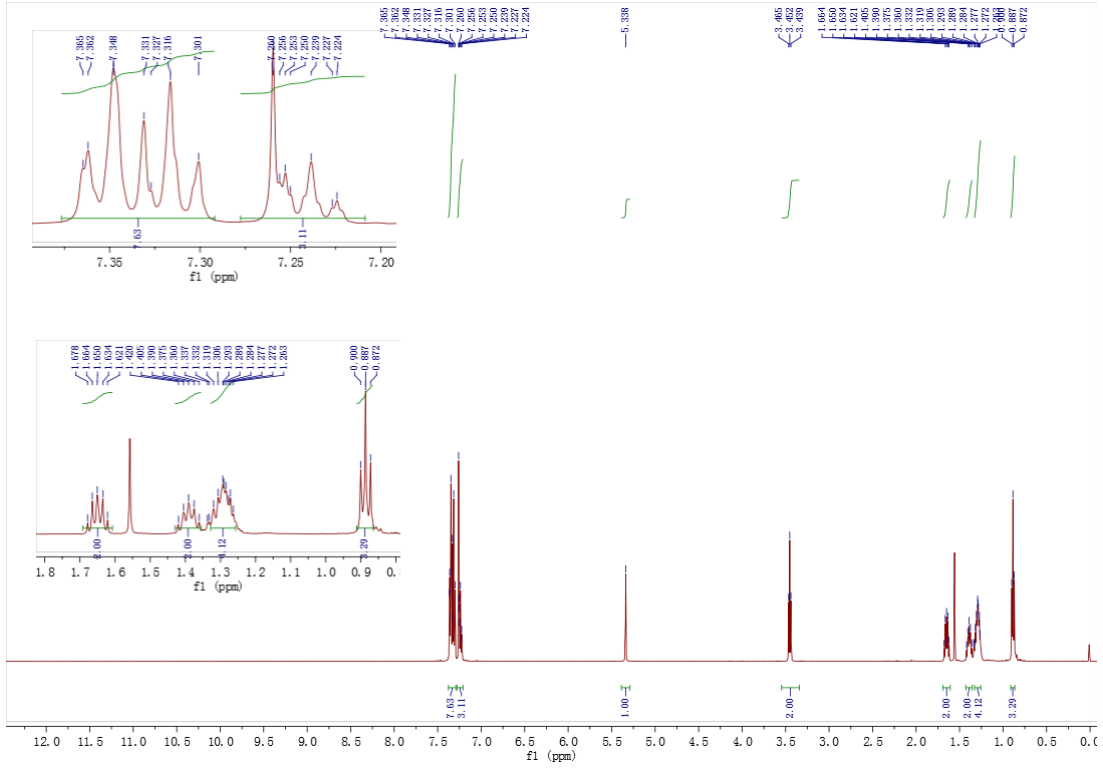

**<sup>13</sup>C NMR**

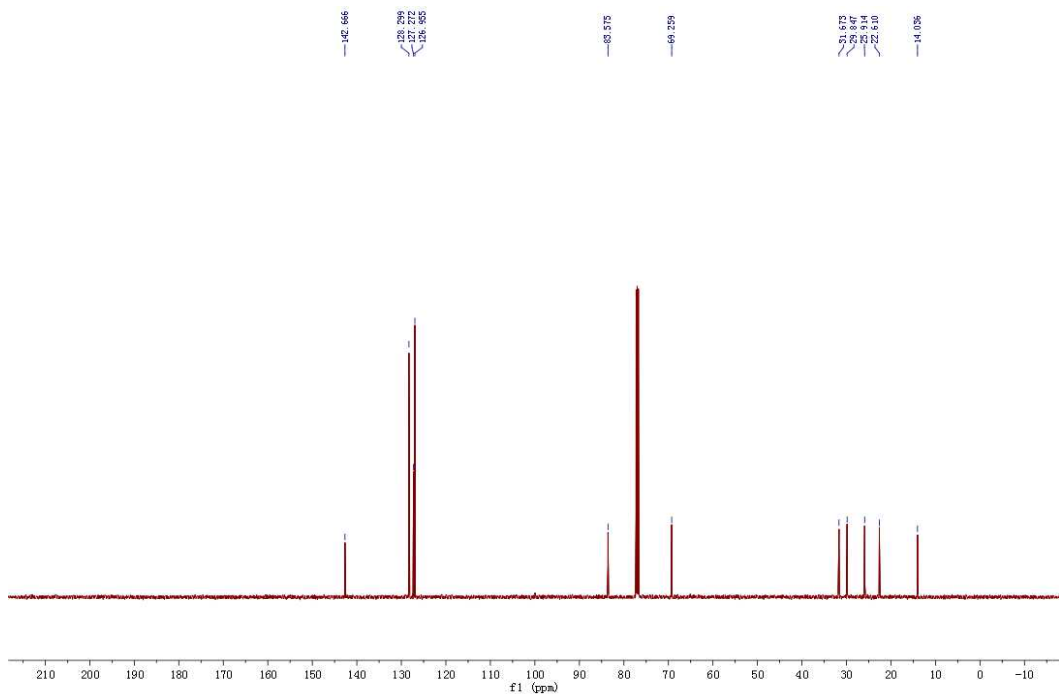

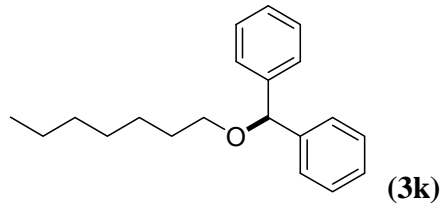

<sup>1</sup>H NMR

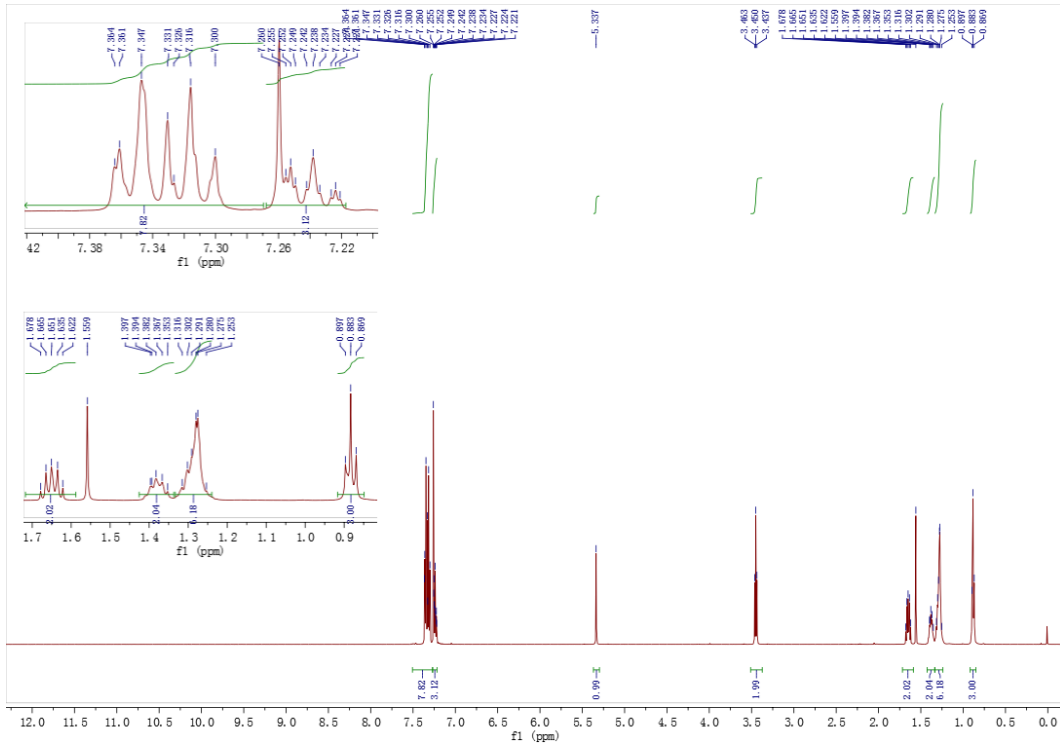

<sup>13</sup>C NMR

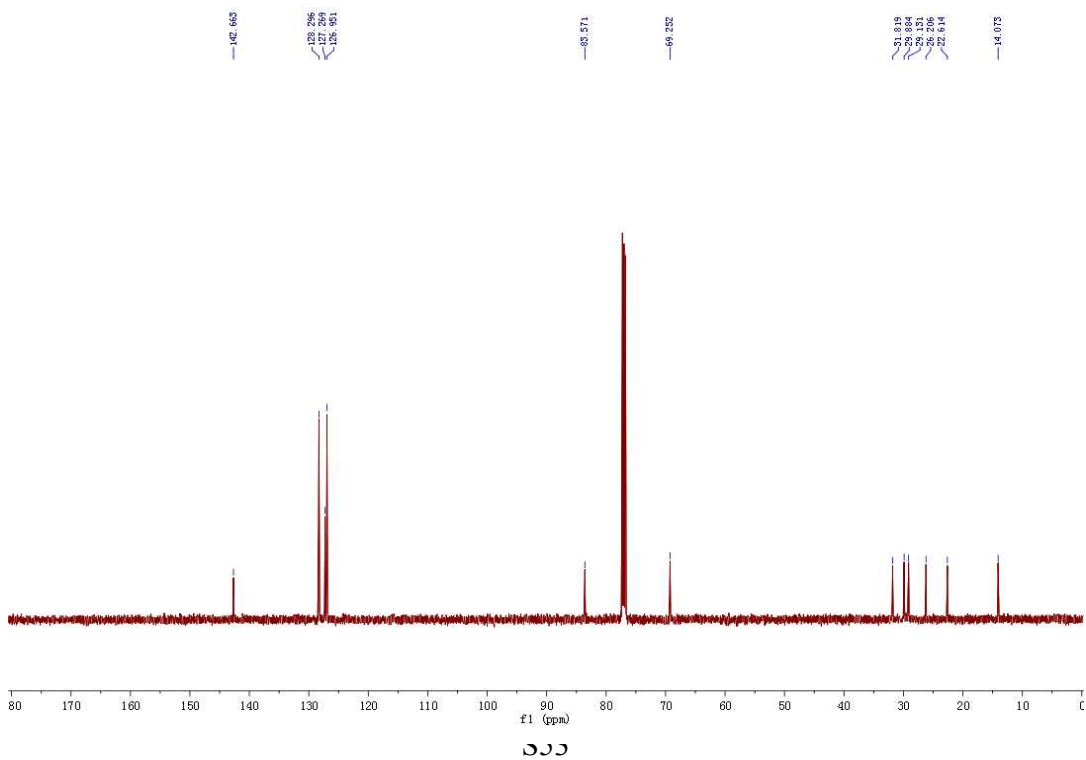

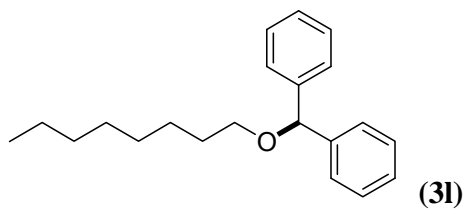

<sup>1</sup>H NMR

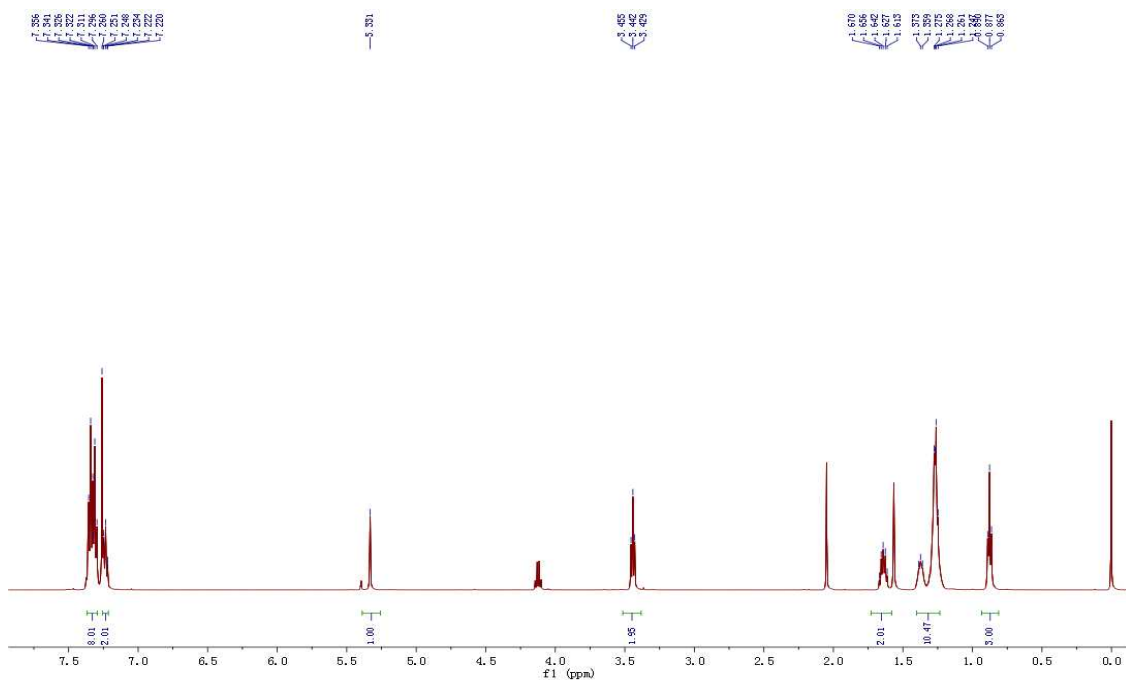

<sup>13</sup>C NMR

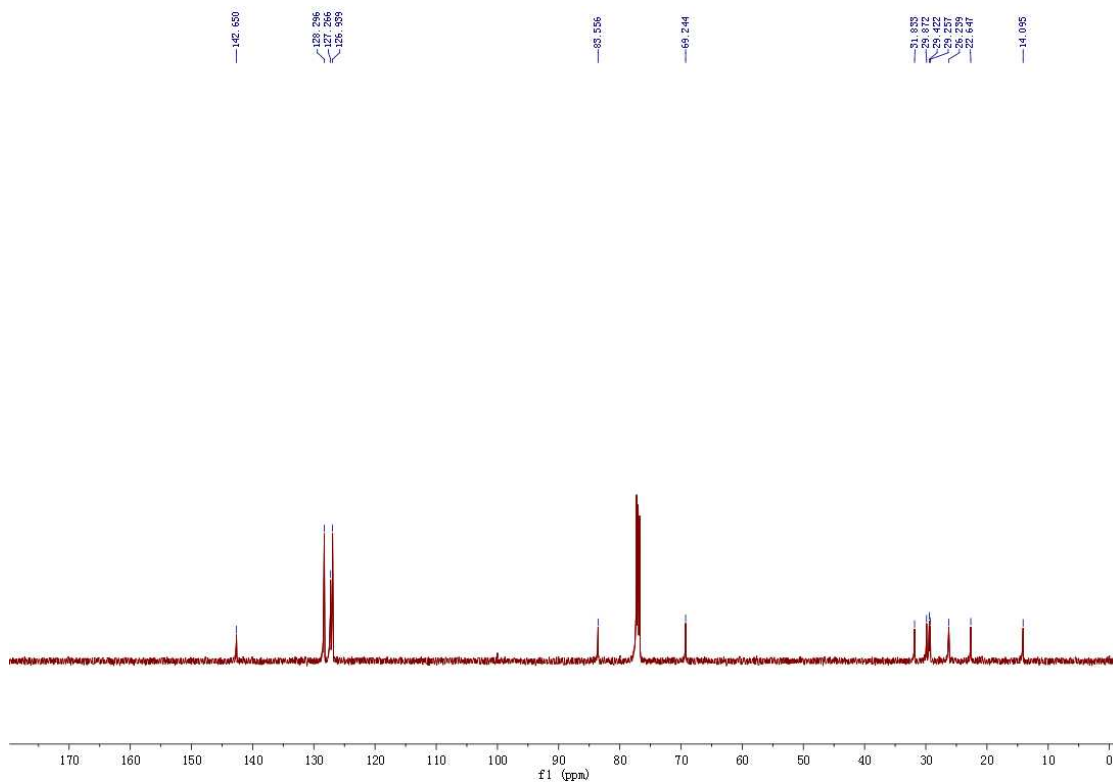

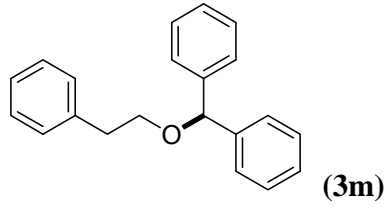

<sup>1</sup>H NMR

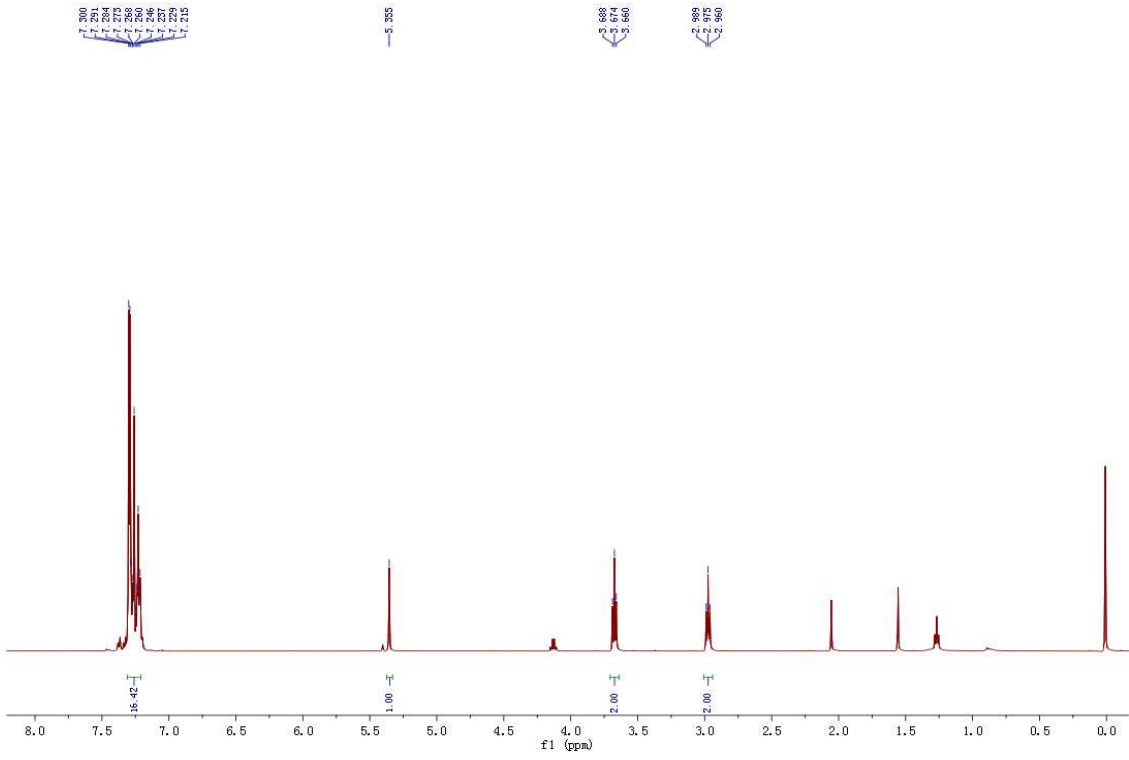

<sup>13</sup>C NMR

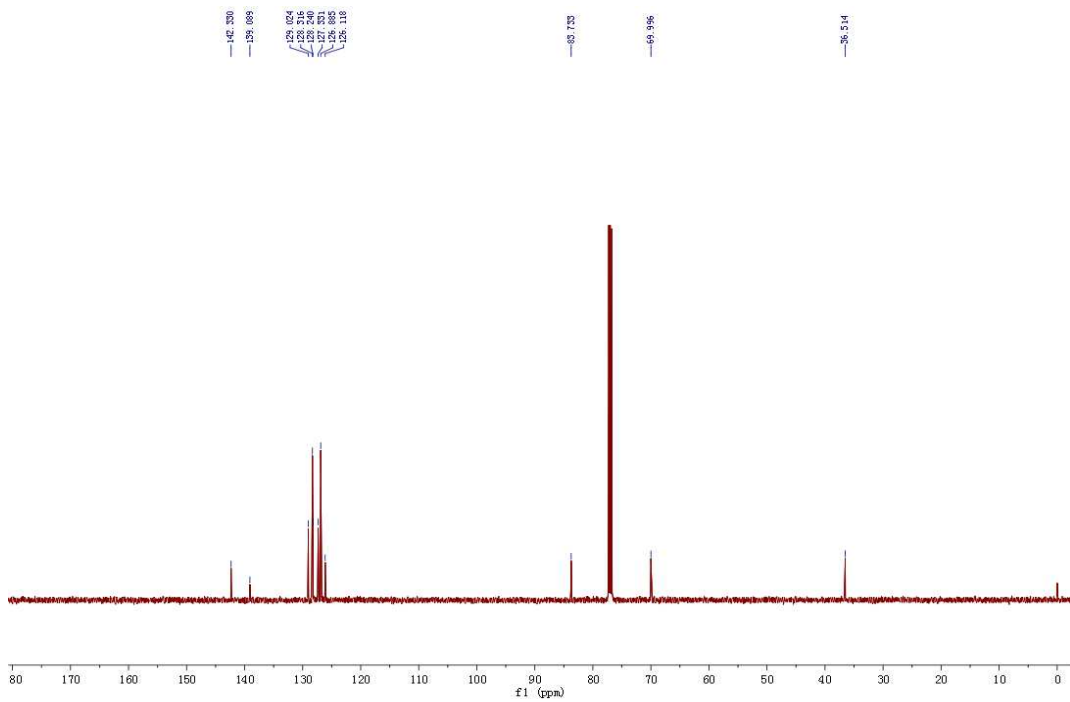

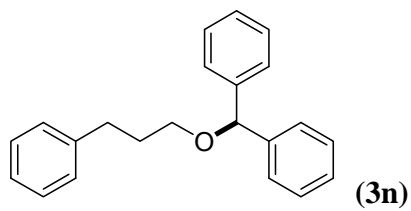

<sup>1</sup>H NMR

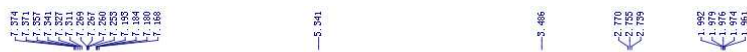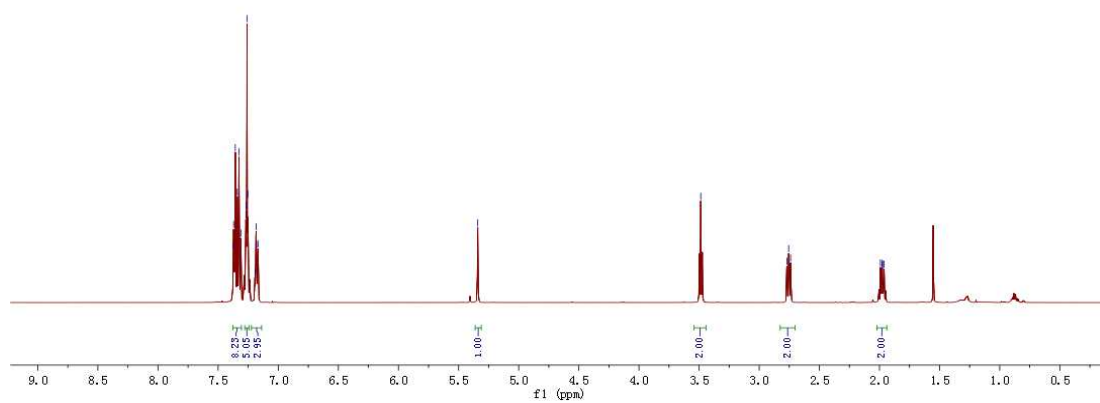

<sup>13</sup>C NMR

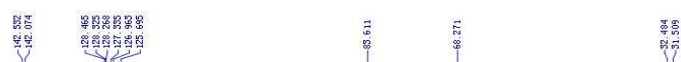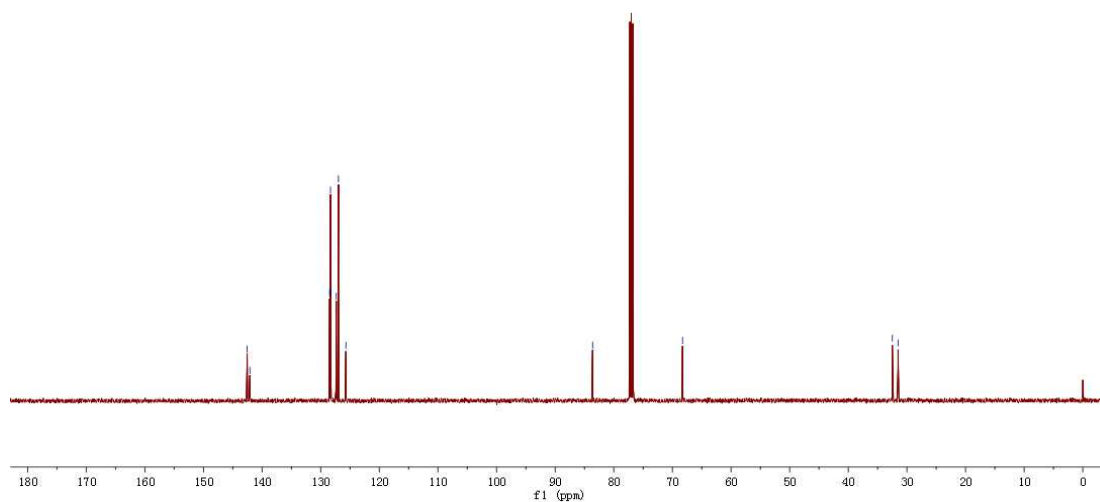



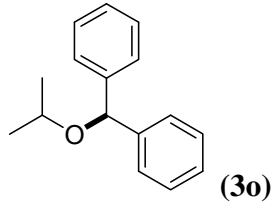

<sup>1</sup>H NMR

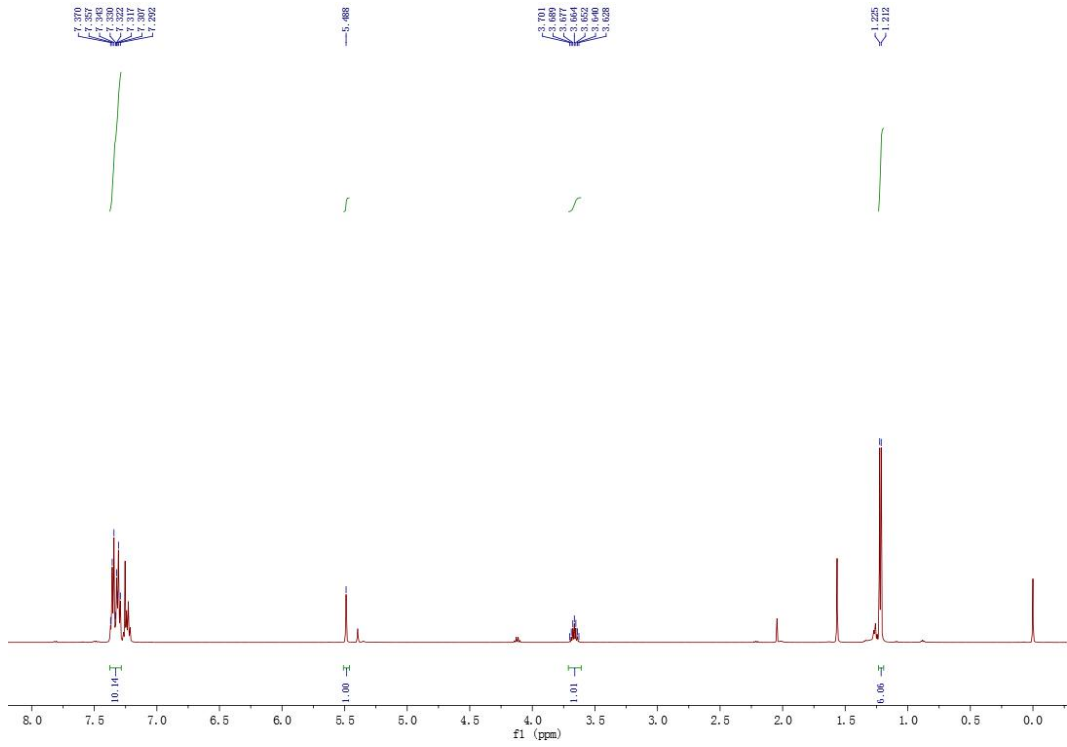

<sup>13</sup>C NMR

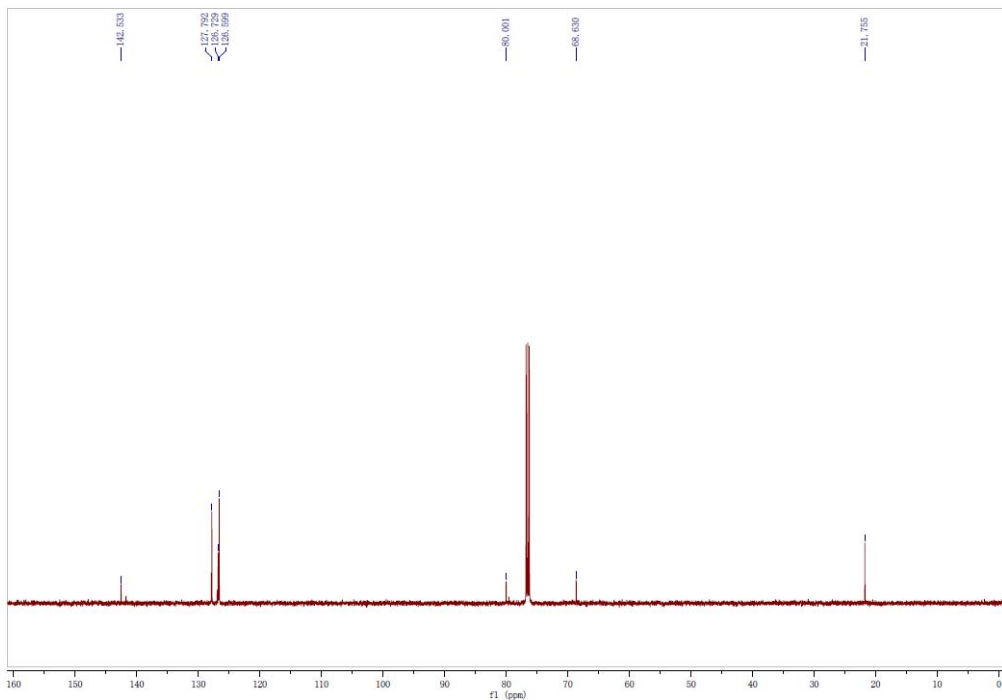

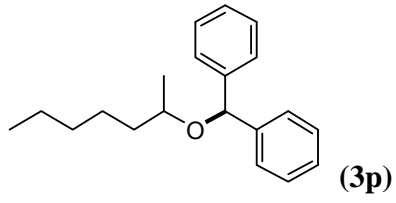

<sup>1</sup>H NMR

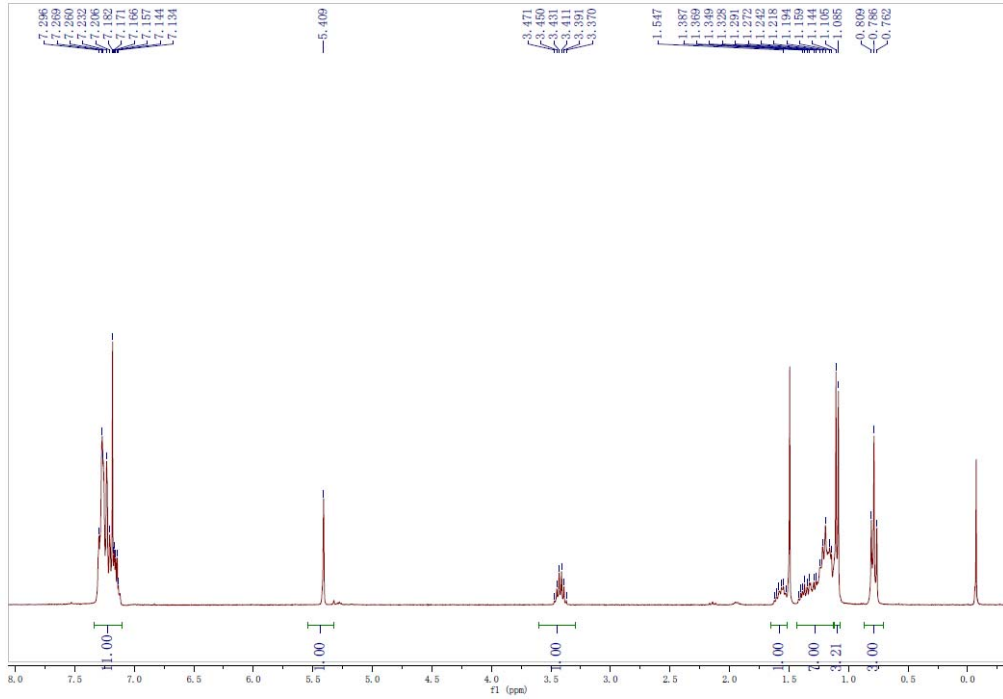

<sup>13</sup>C NMR

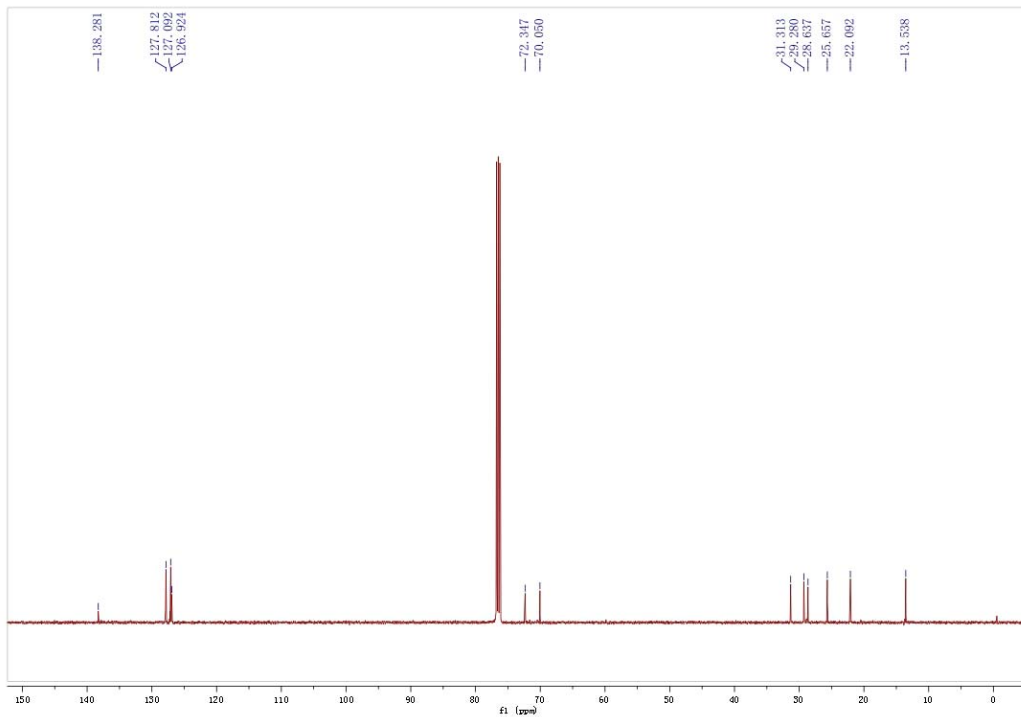

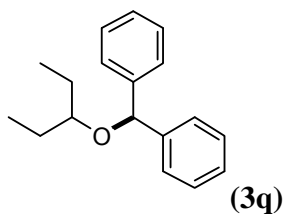

<sup>1</sup>H NMR

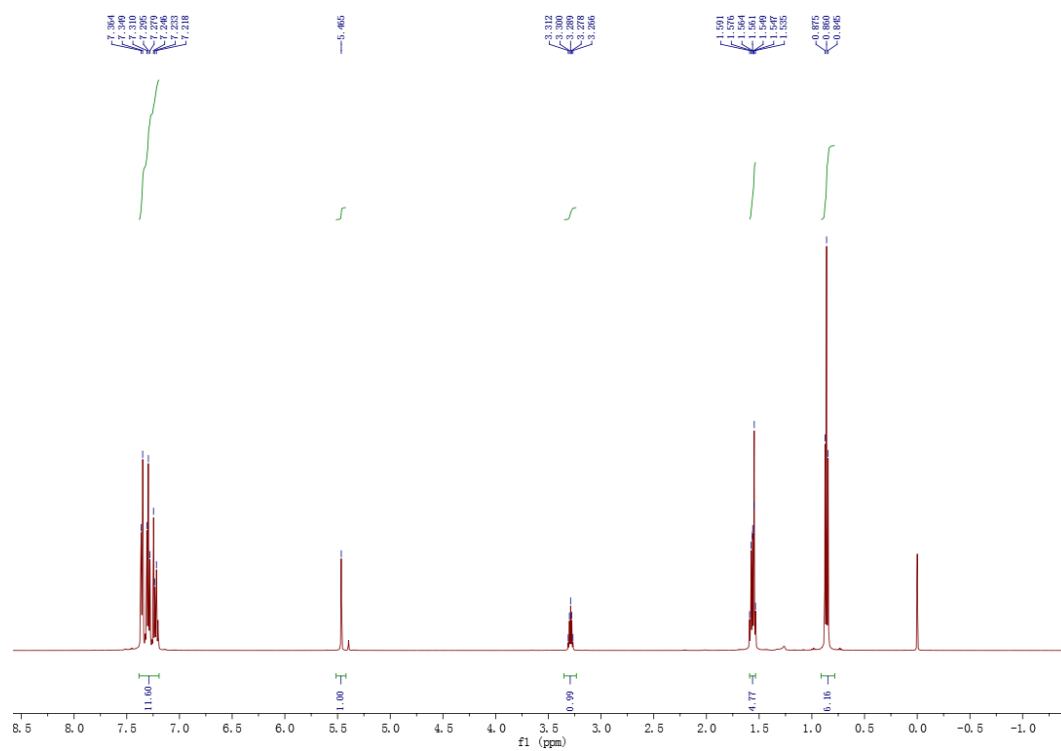

<sup>13</sup>C NMR

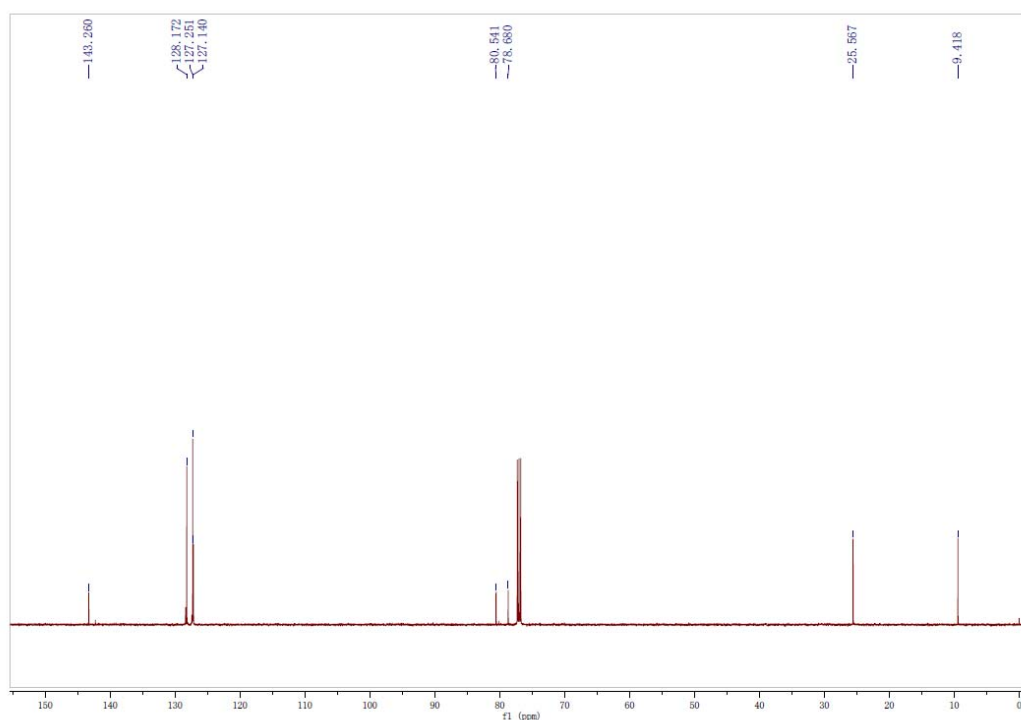

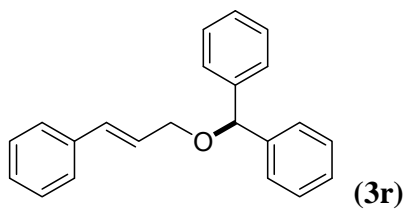

<sup>1</sup>H NMR

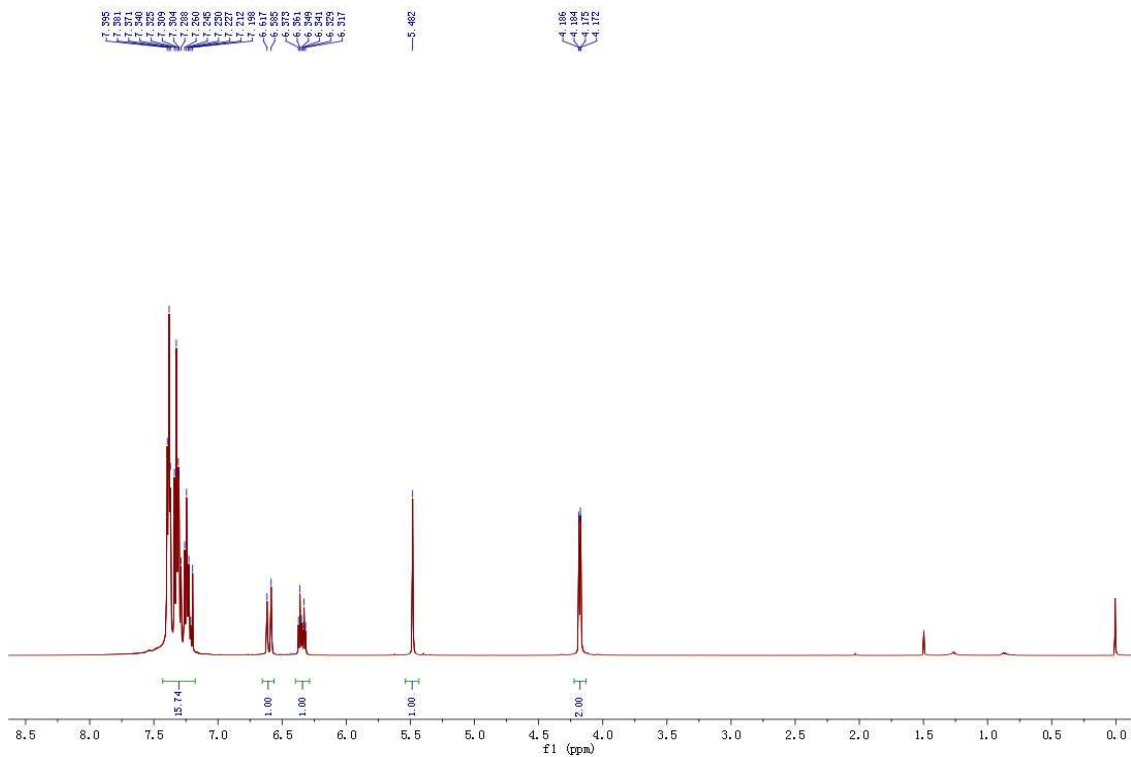

<sup>13</sup>C NMR

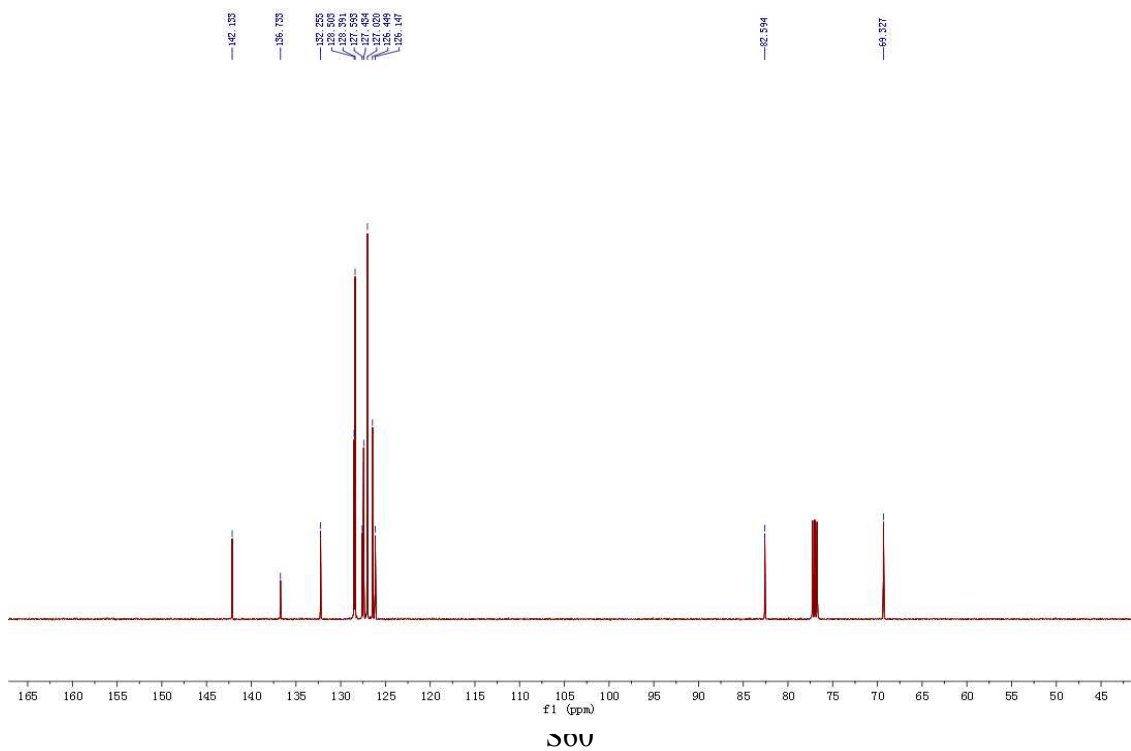

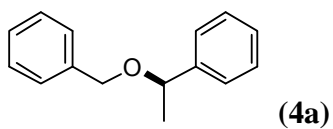

<sup>1</sup>H NMR

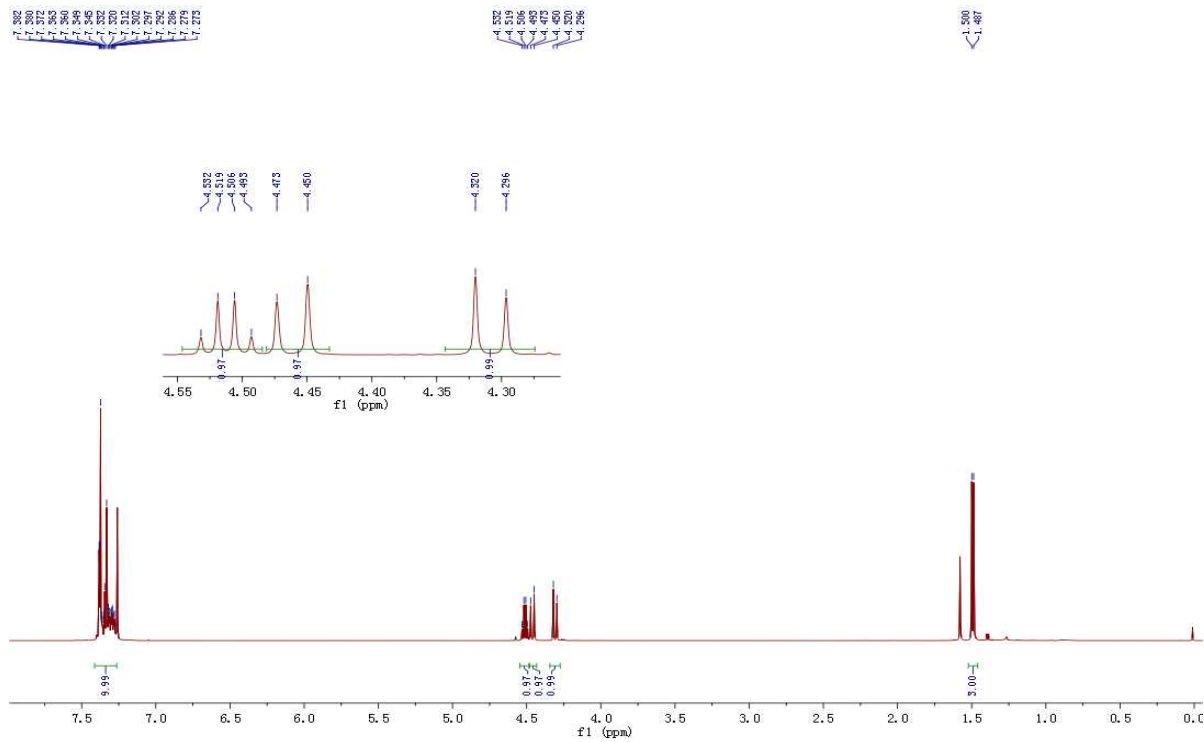

<sup>13</sup>C NMR

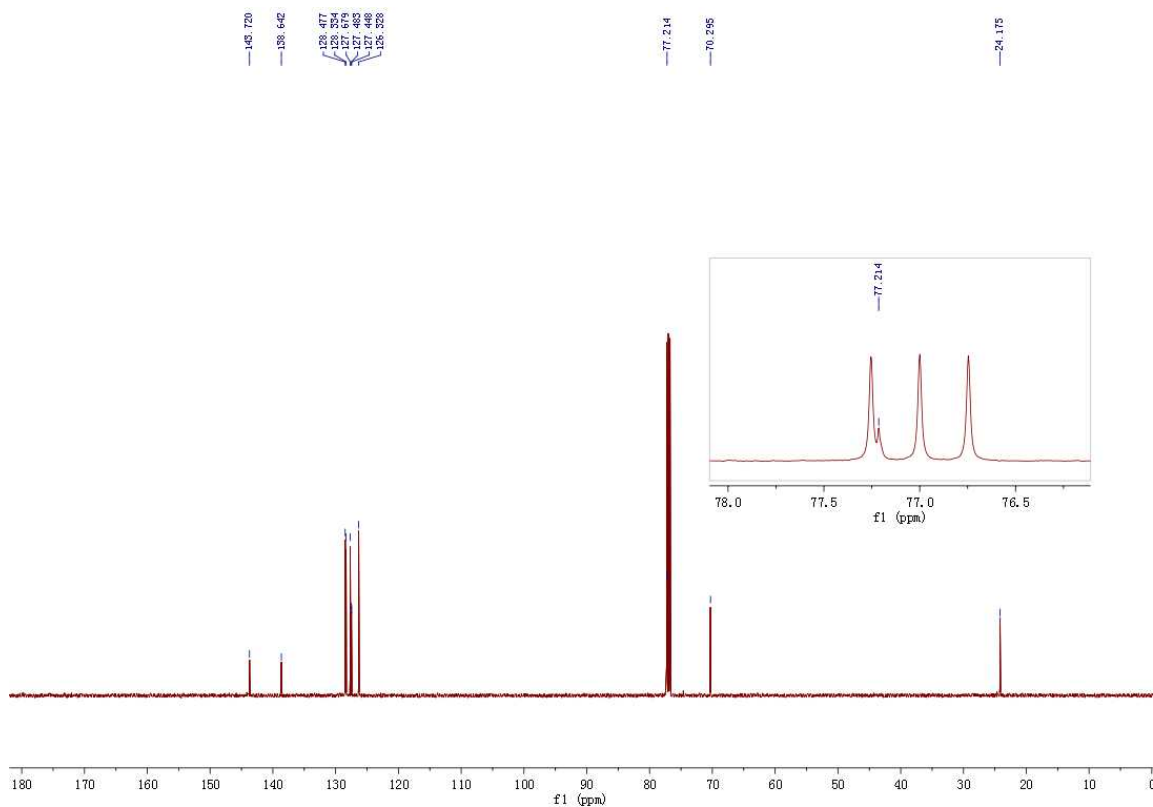



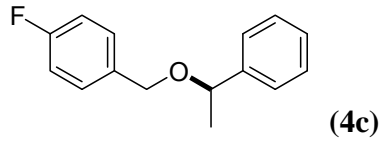

**<sup>1</sup>H NMR**

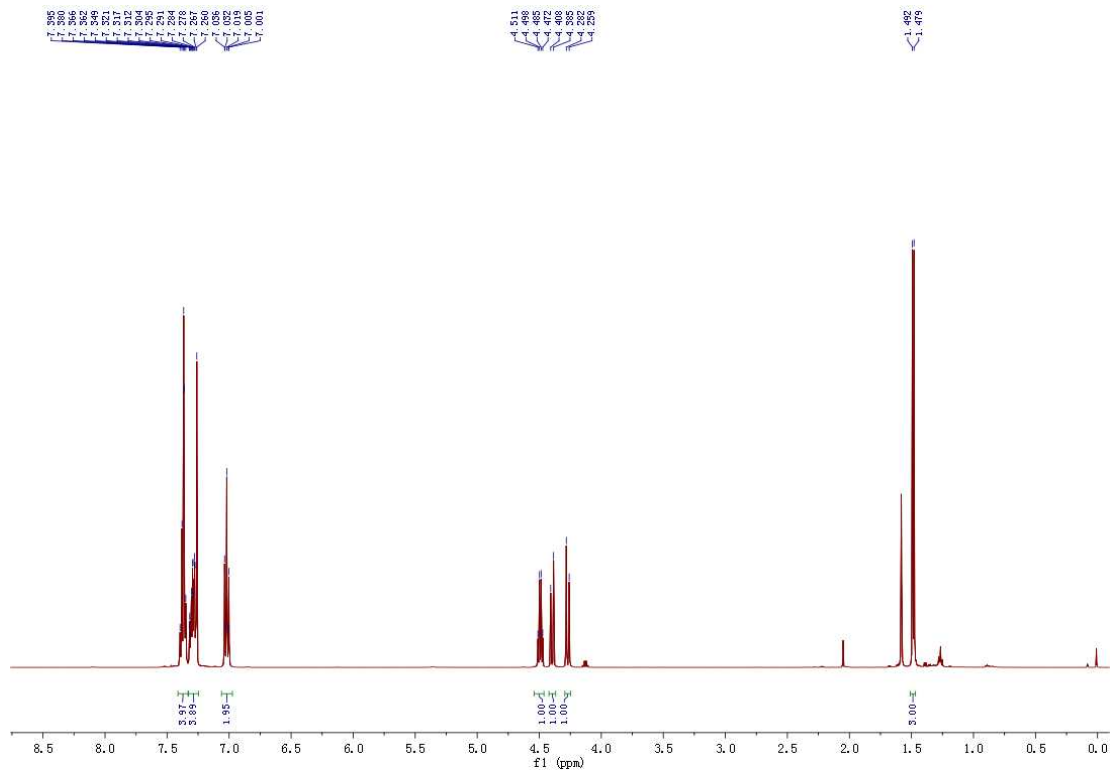

**<sup>13</sup>C NMR**

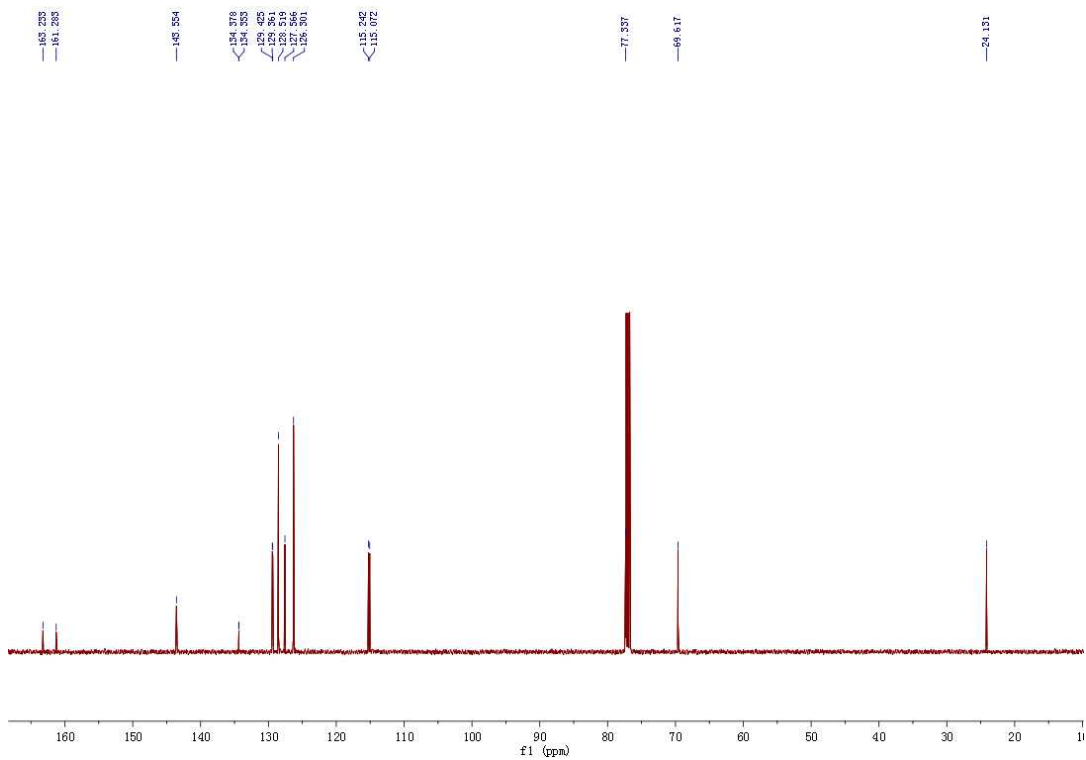

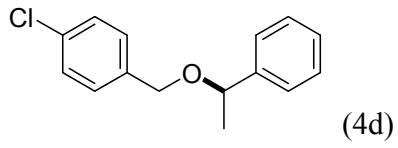

**<sup>1</sup>H NMR**

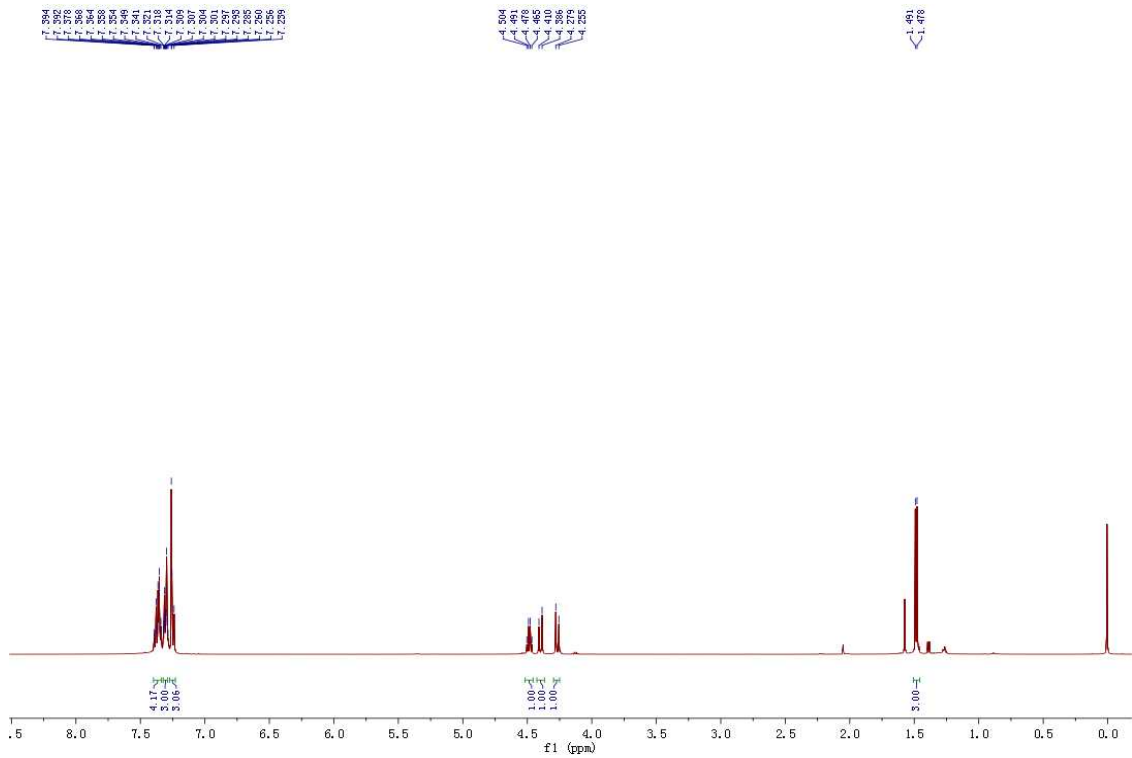

**<sup>13</sup>C NMR**

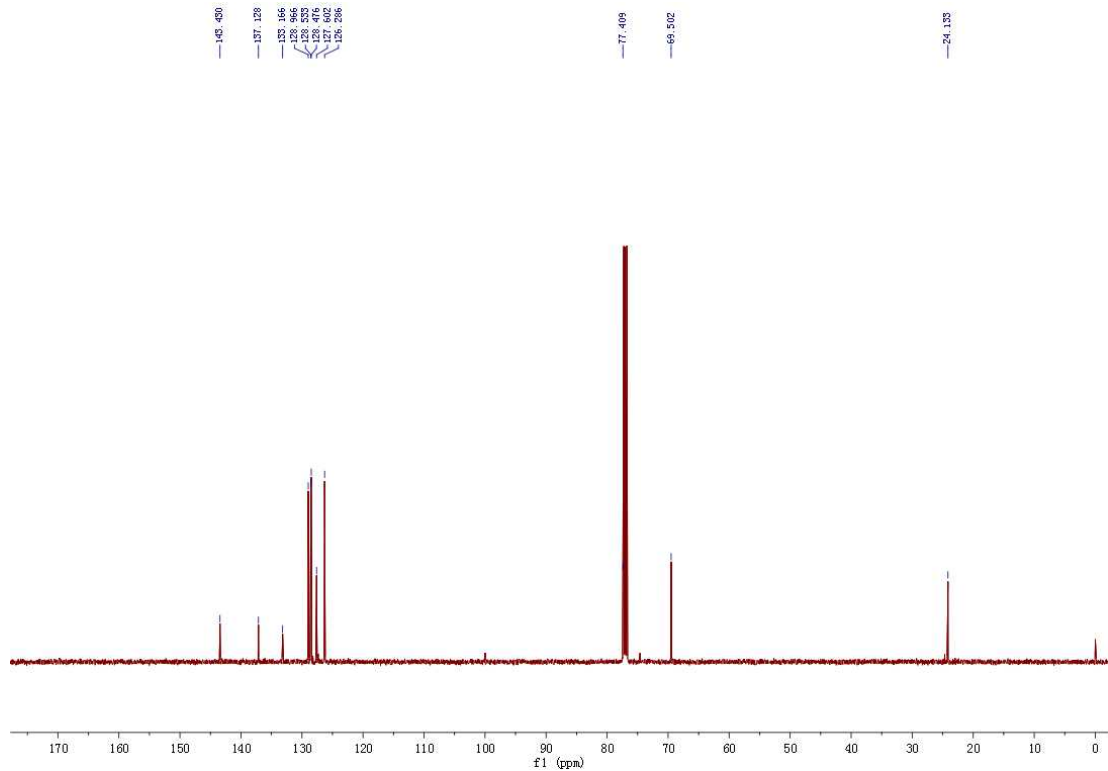



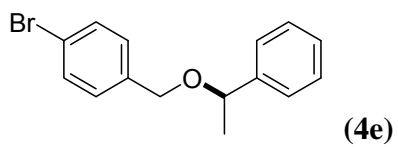

**<sup>1</sup>H NMR**

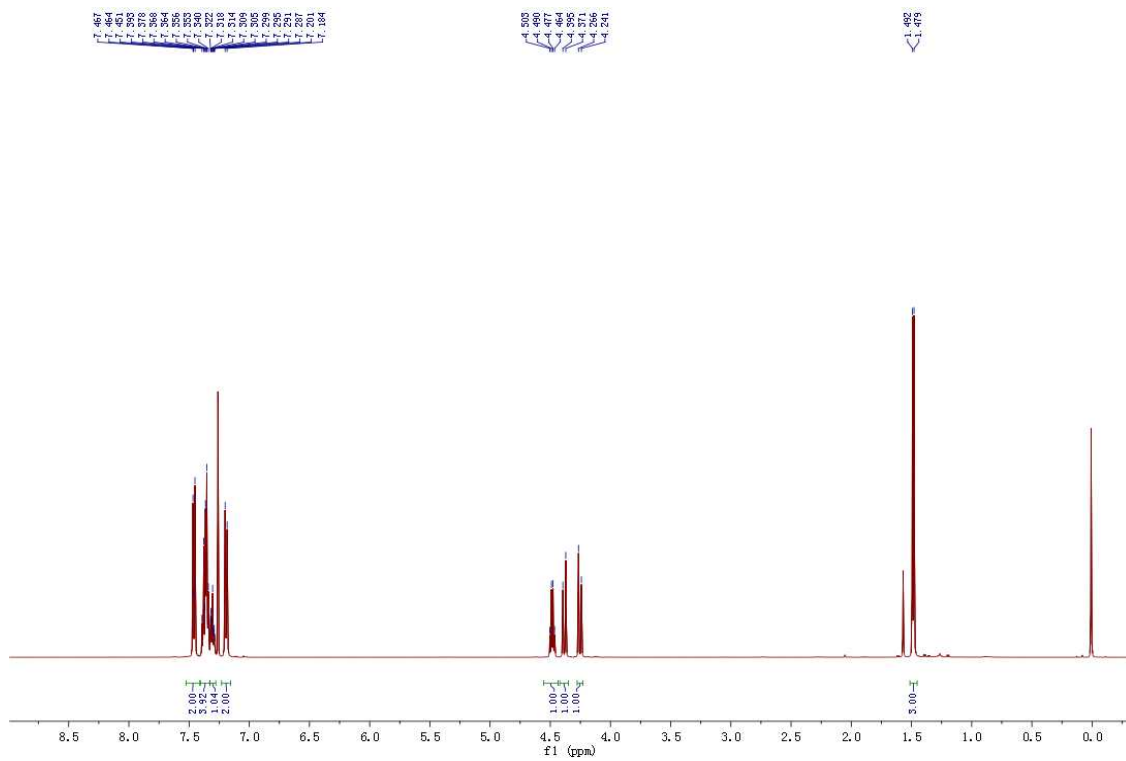

**<sup>13</sup>C NMR**

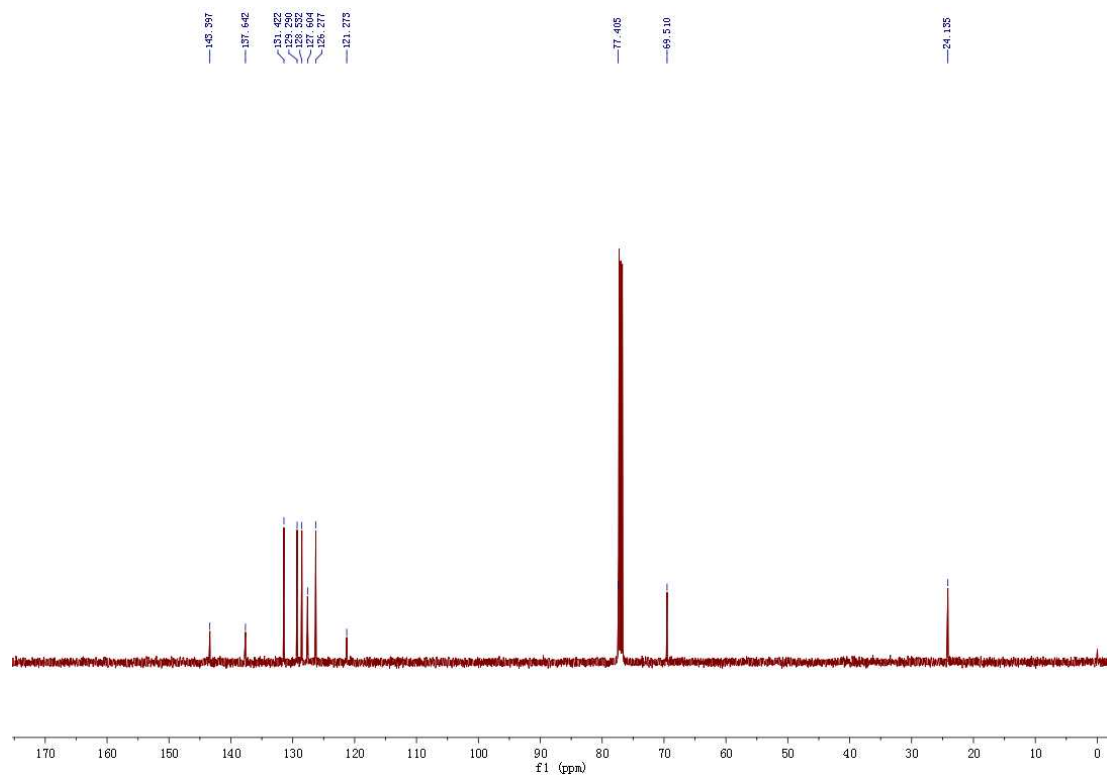



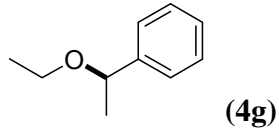

<sup>1</sup>H NMR

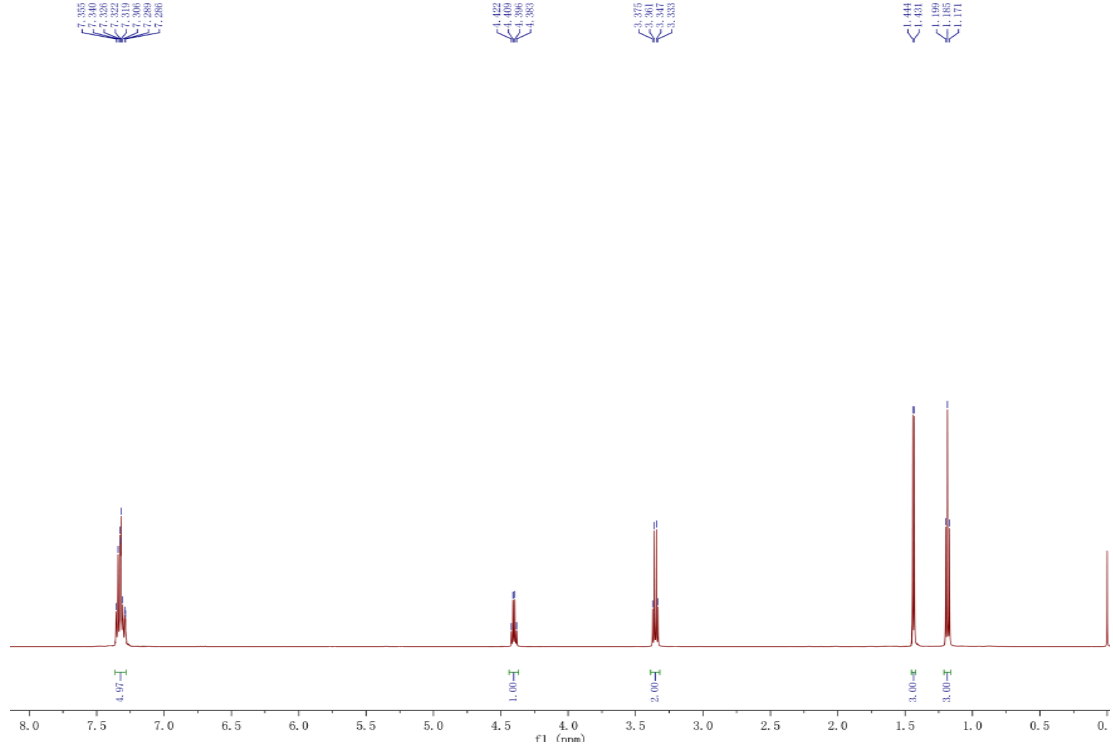

<sup>13</sup>C NMR

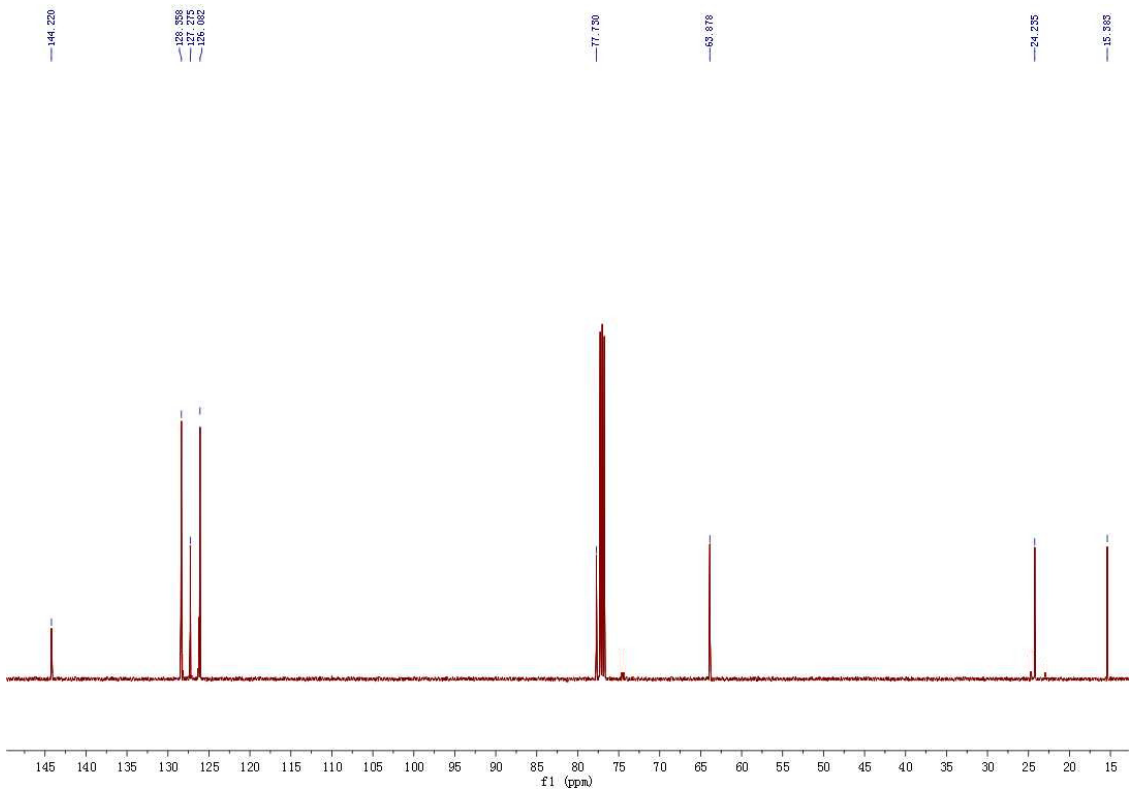

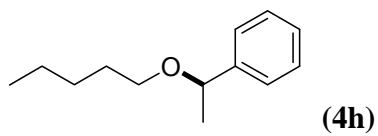

<sup>1</sup>H NMR

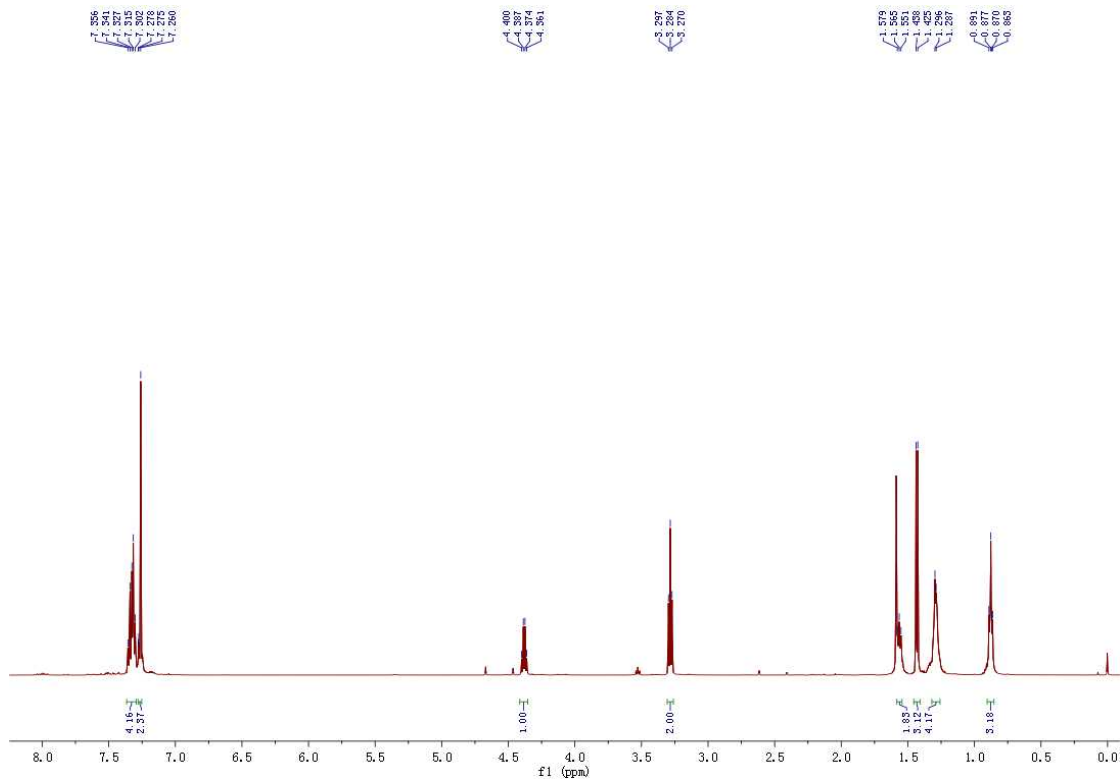

<sup>13</sup>C NMR

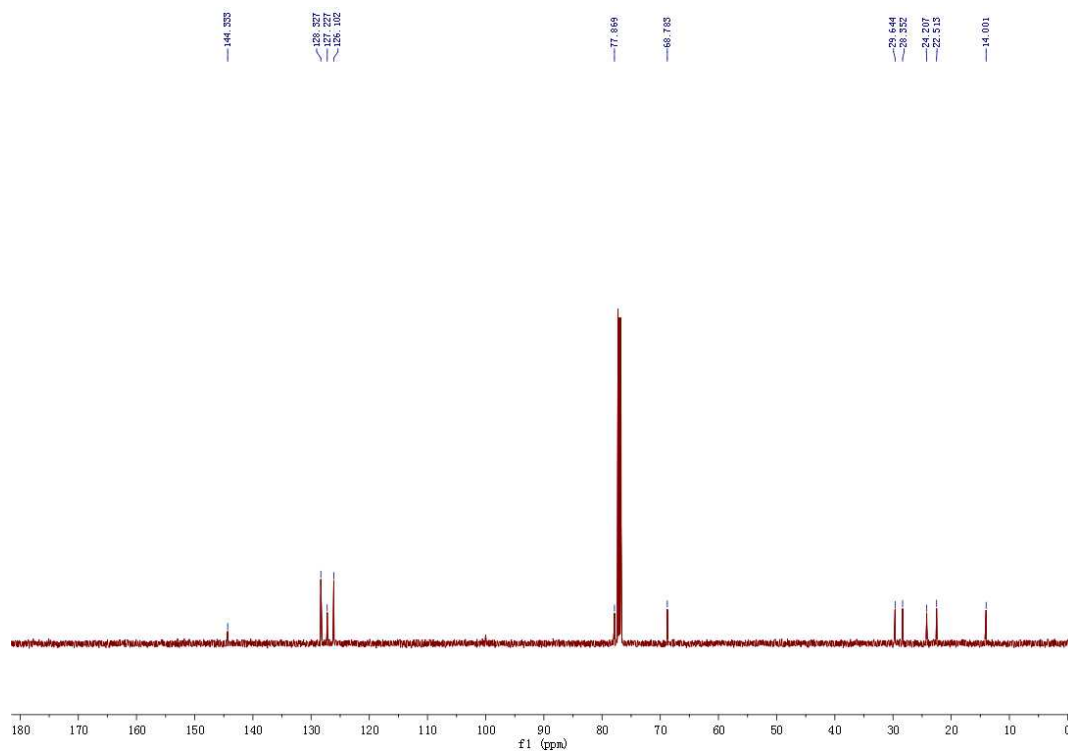

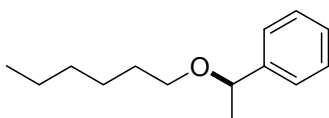

(4i)

<sup>1</sup>H NMR

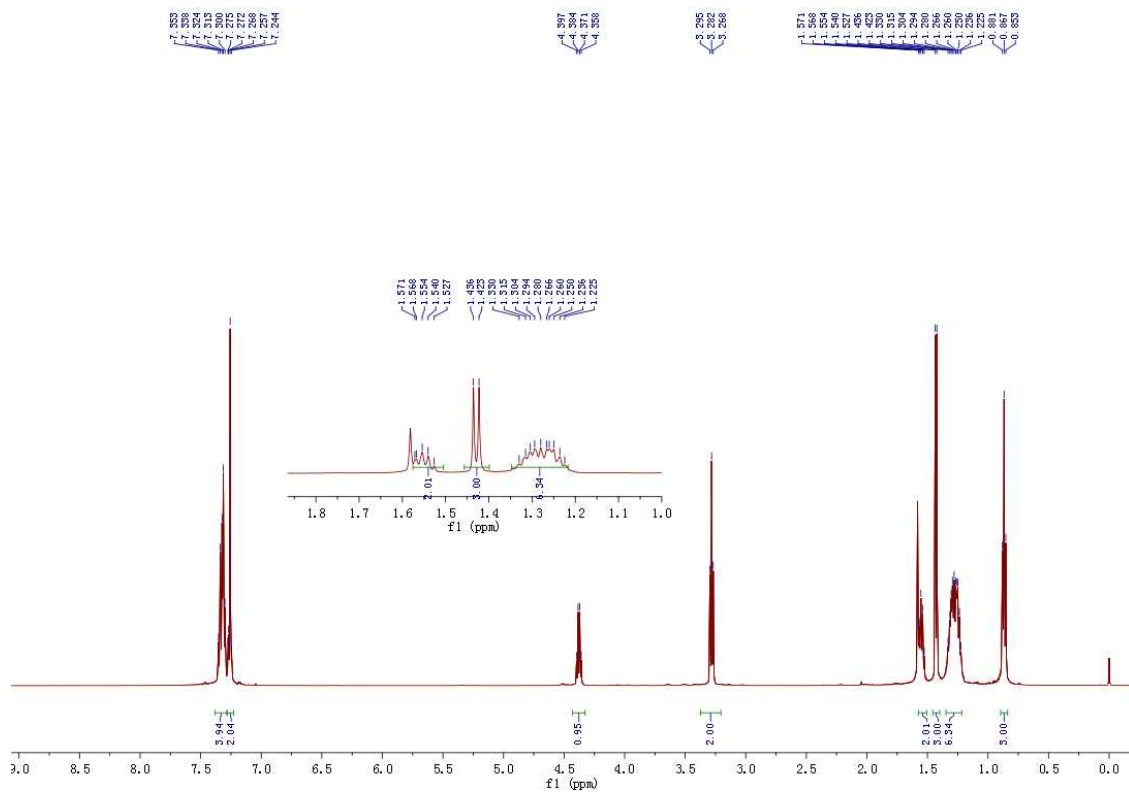

<sup>13</sup>C NMR

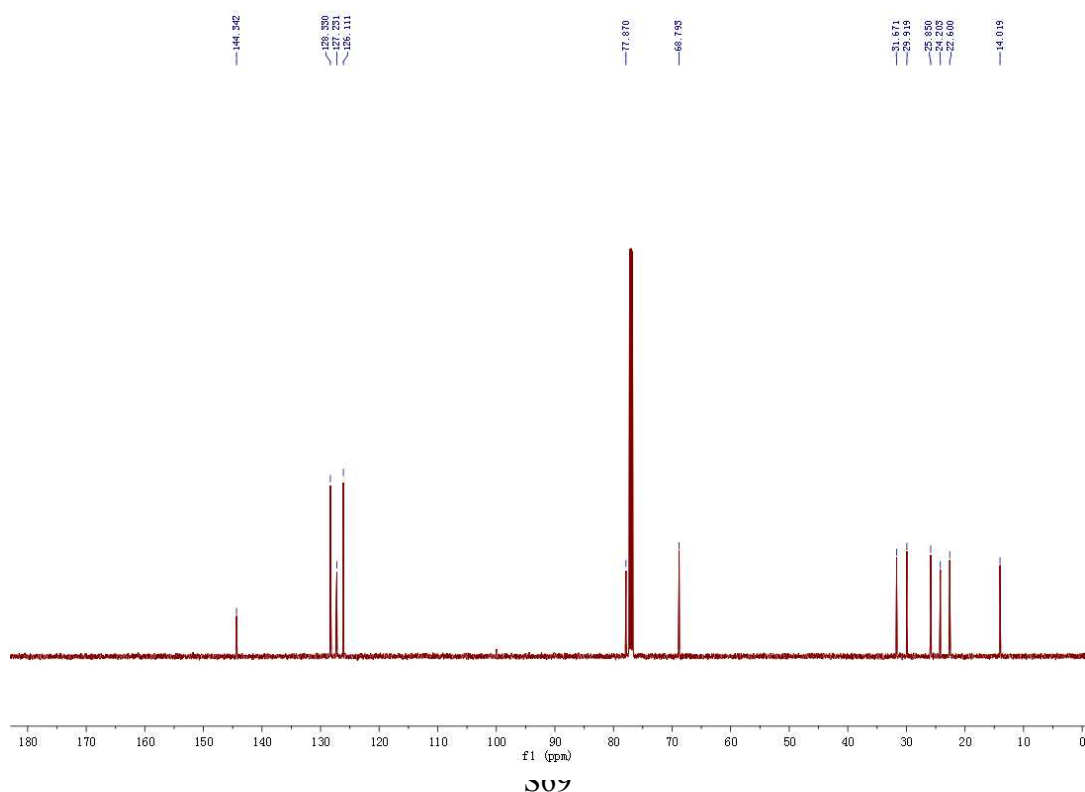

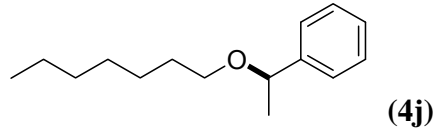

**<sup>1</sup>H NMR**

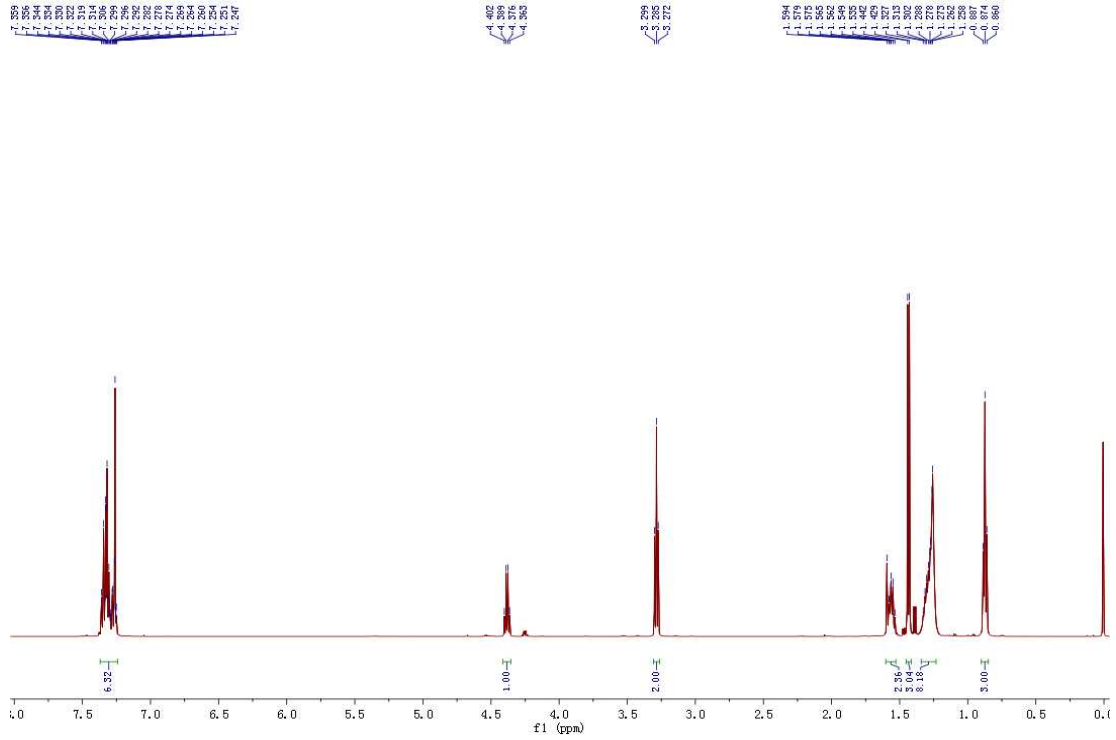

**<sup>13</sup>C NMR**

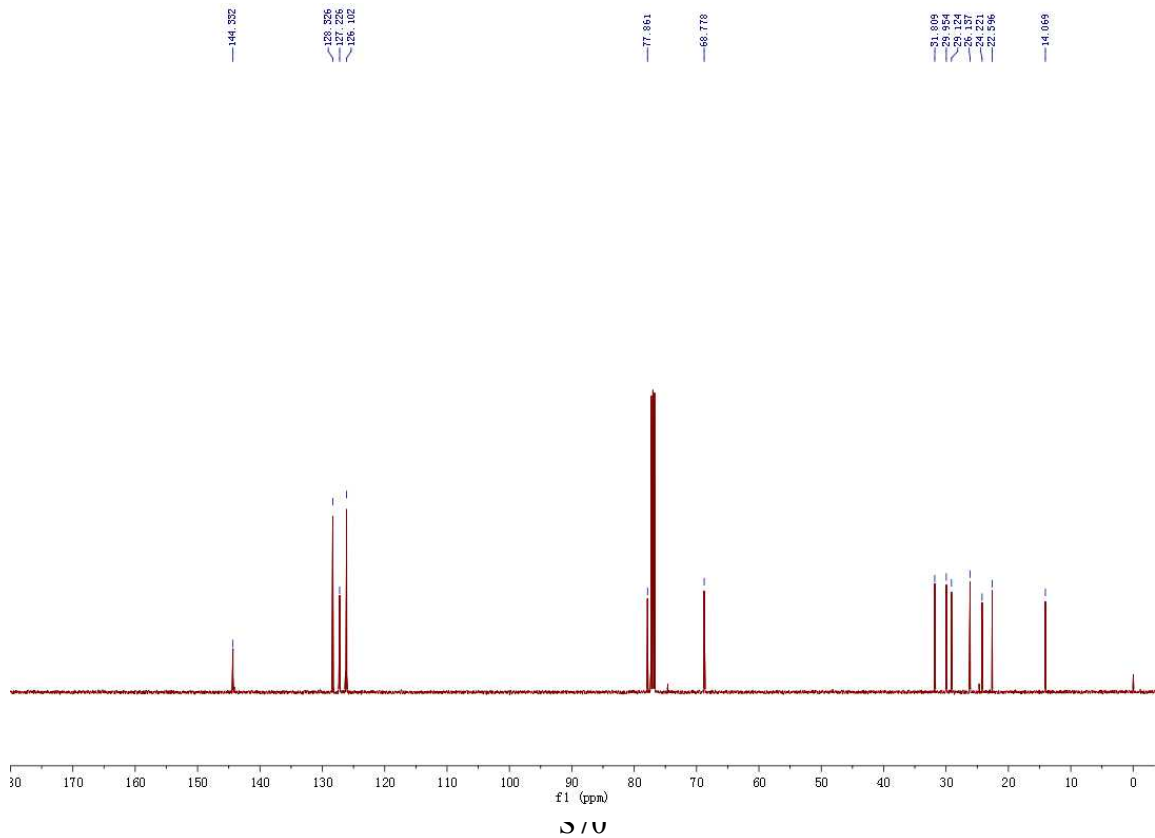

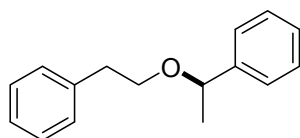

(4k)

<sup>1</sup>H NMR

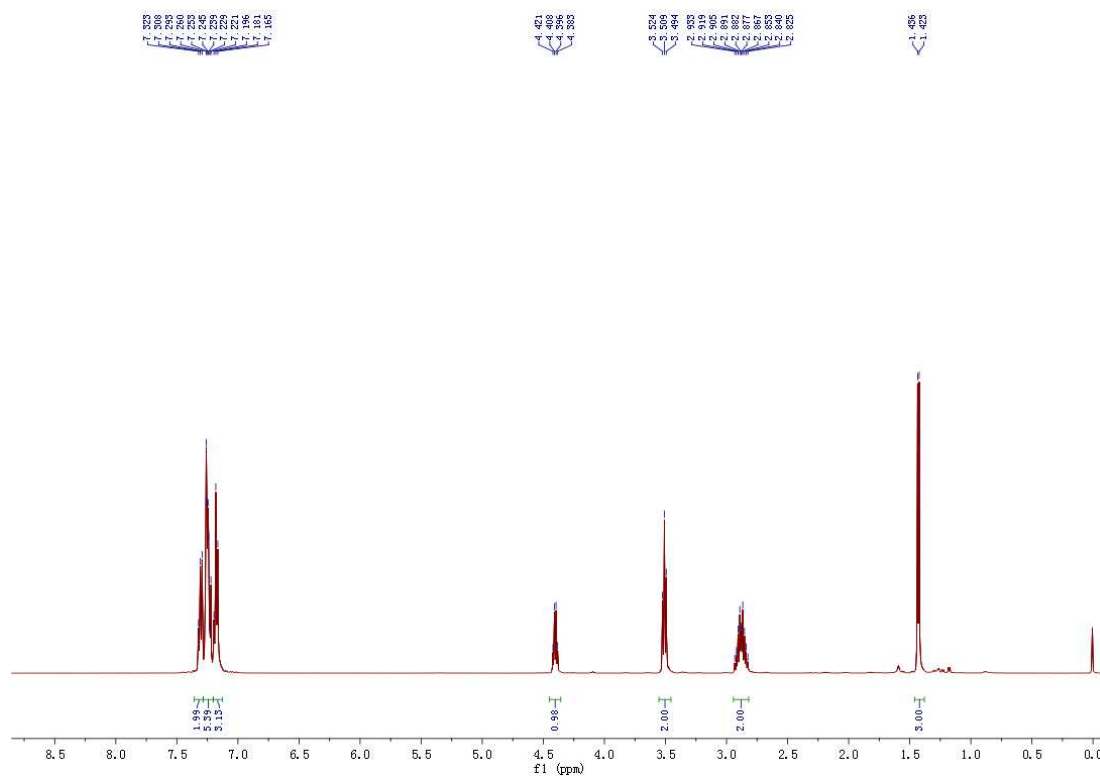

<sup>13</sup>C NMR

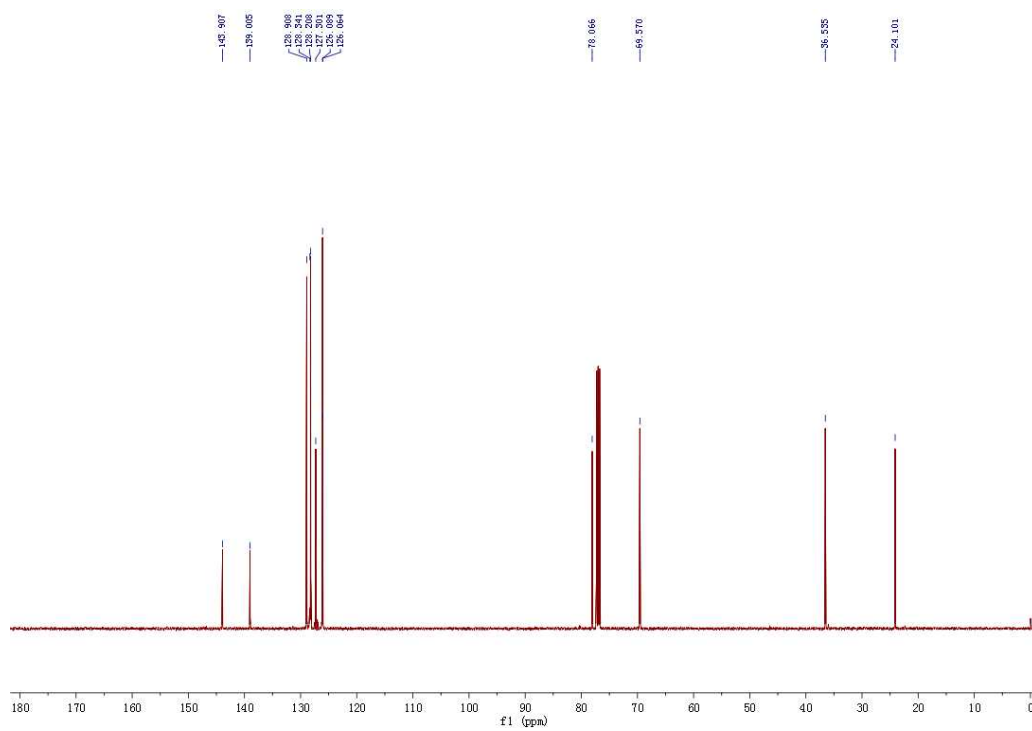

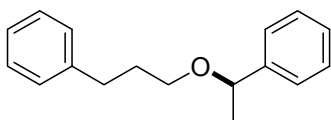

(4I)

<sup>1</sup>H NMR

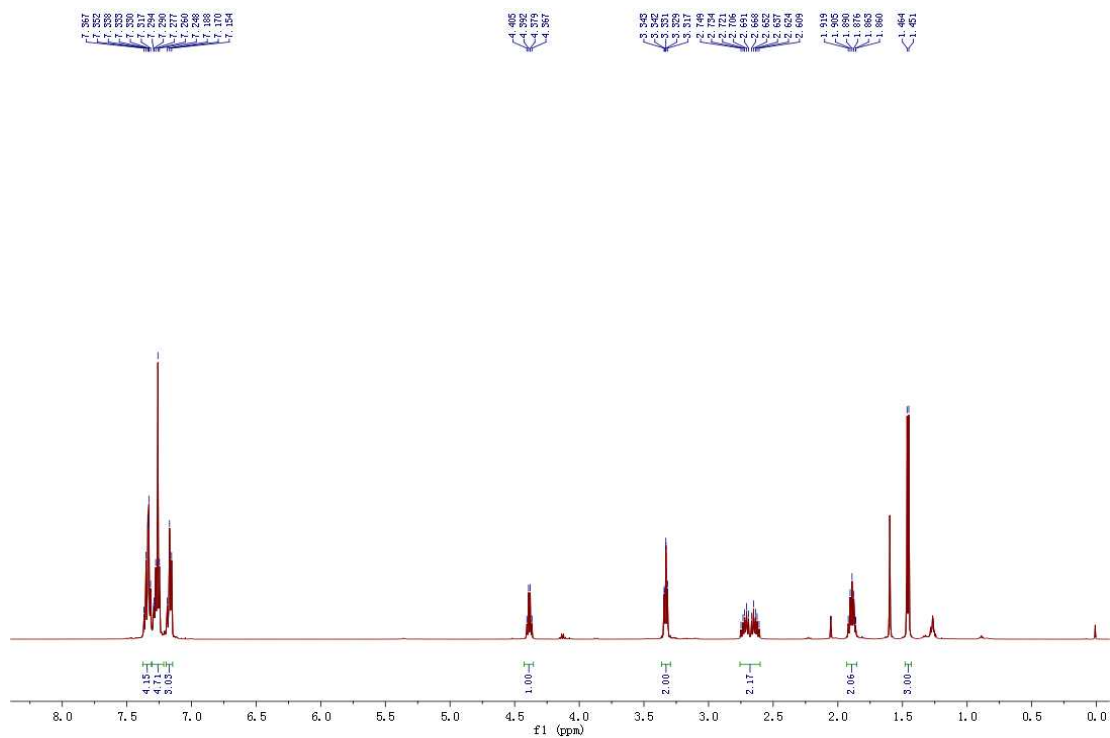

<sup>13</sup>C NMR

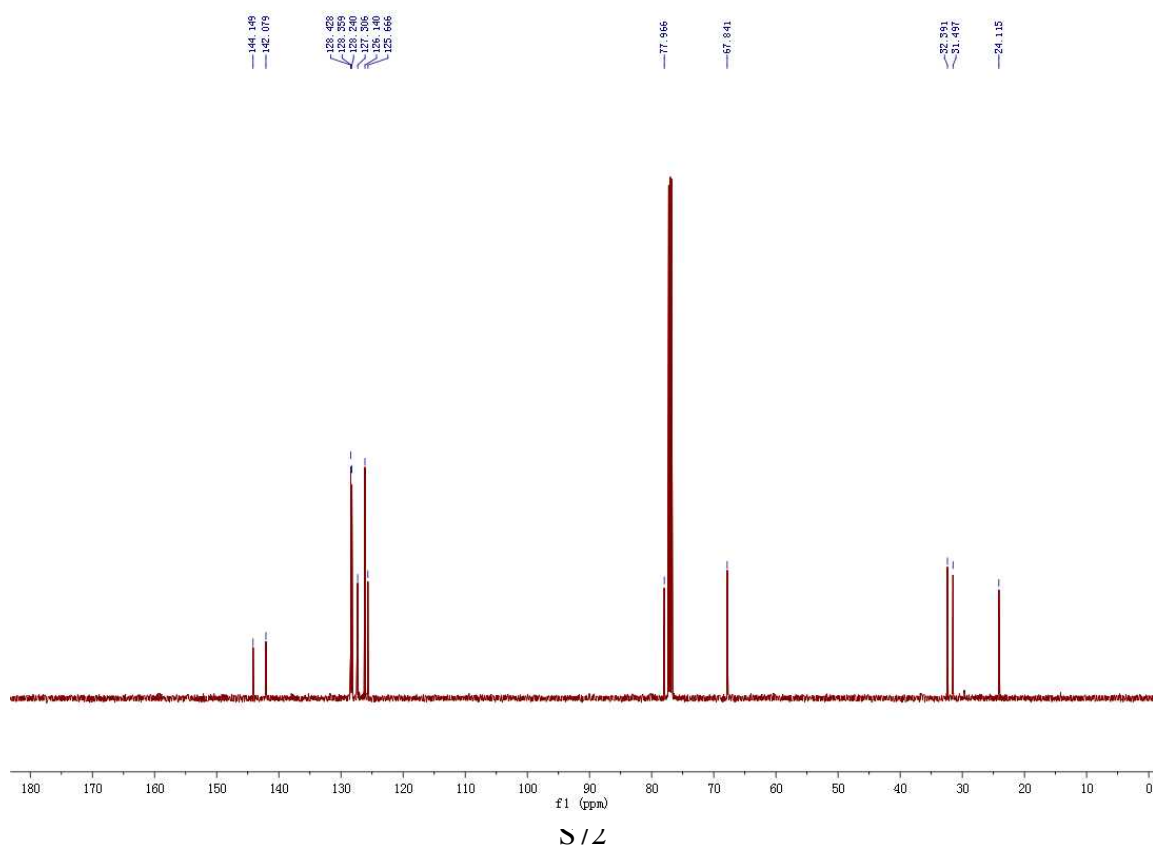



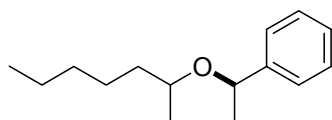

(4m)

<sup>1</sup>H NMR

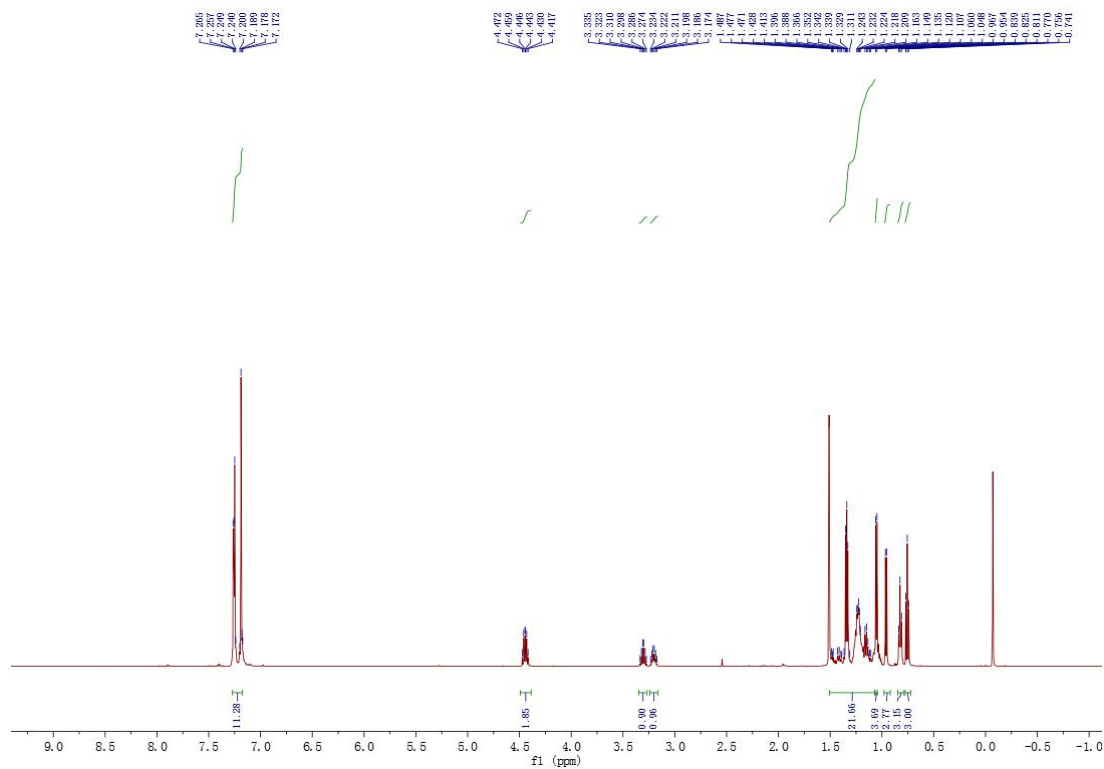

<sup>13</sup>C NMR

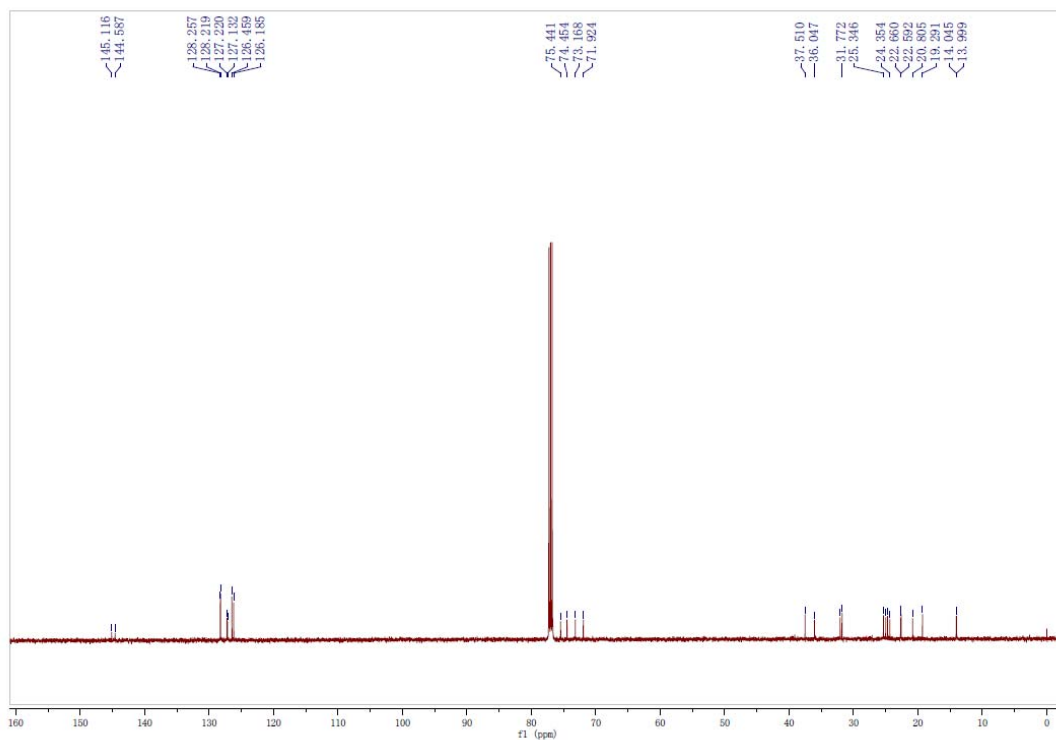

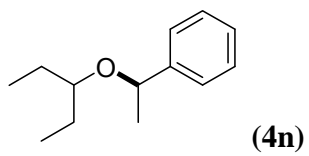

**<sup>1</sup>H NMR**

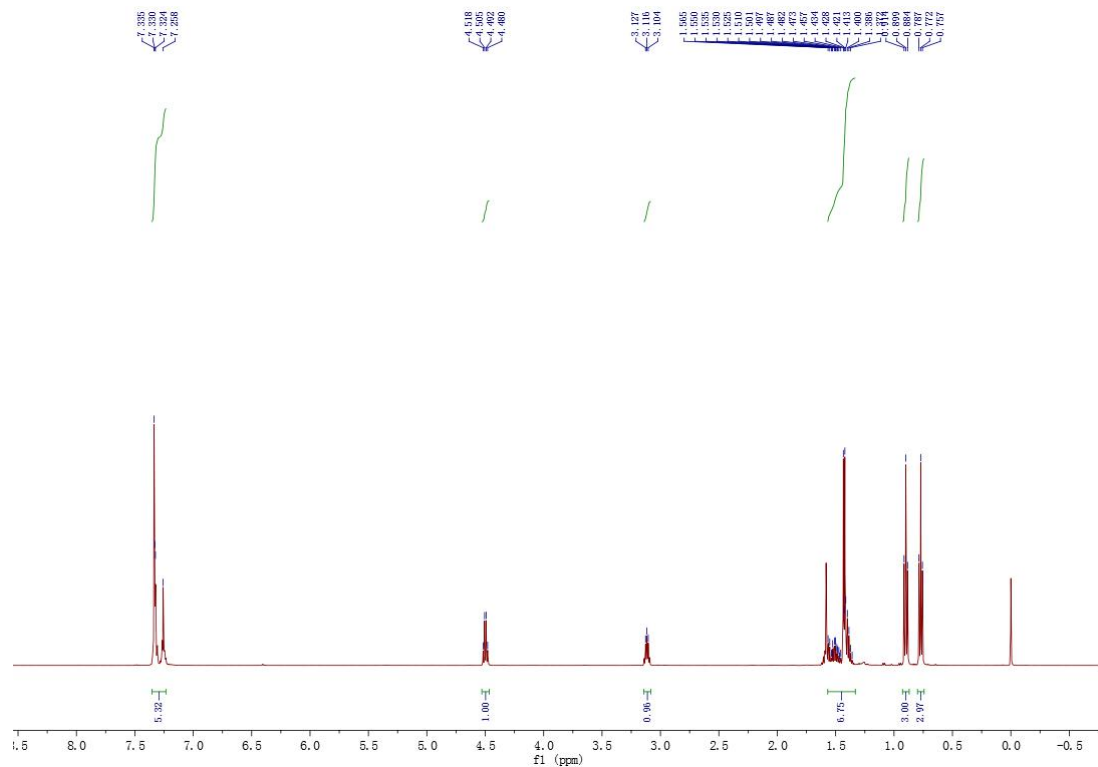

**<sup>13</sup>C NMR**

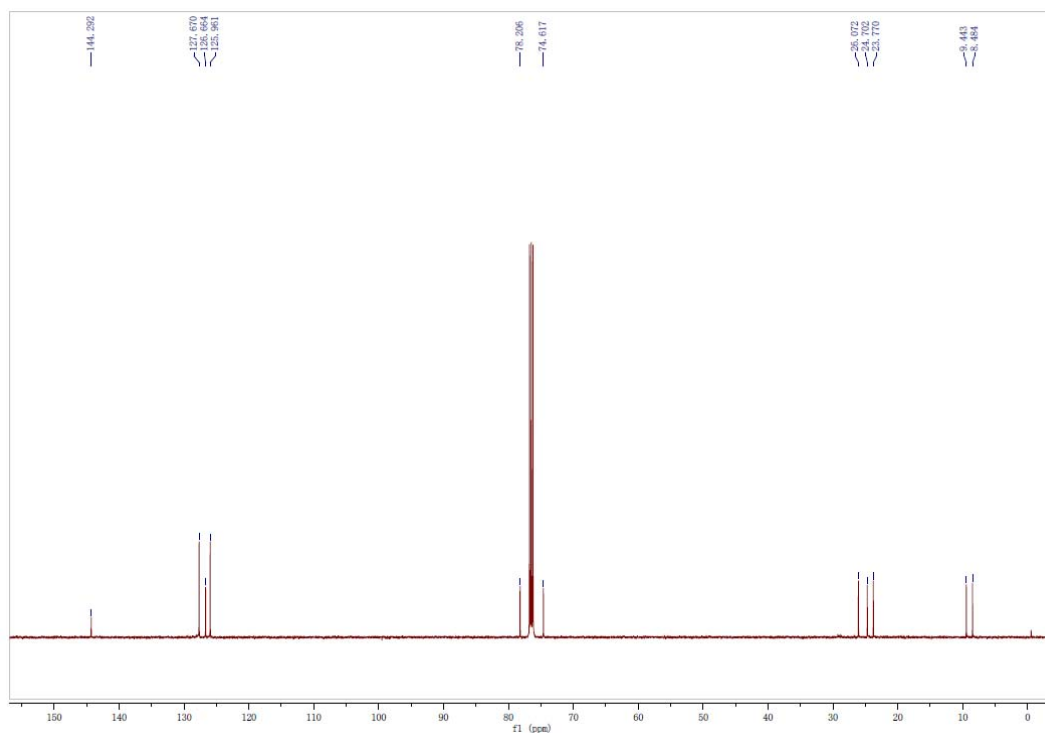

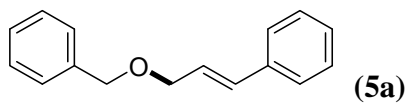

**<sup>1</sup>H NMR**

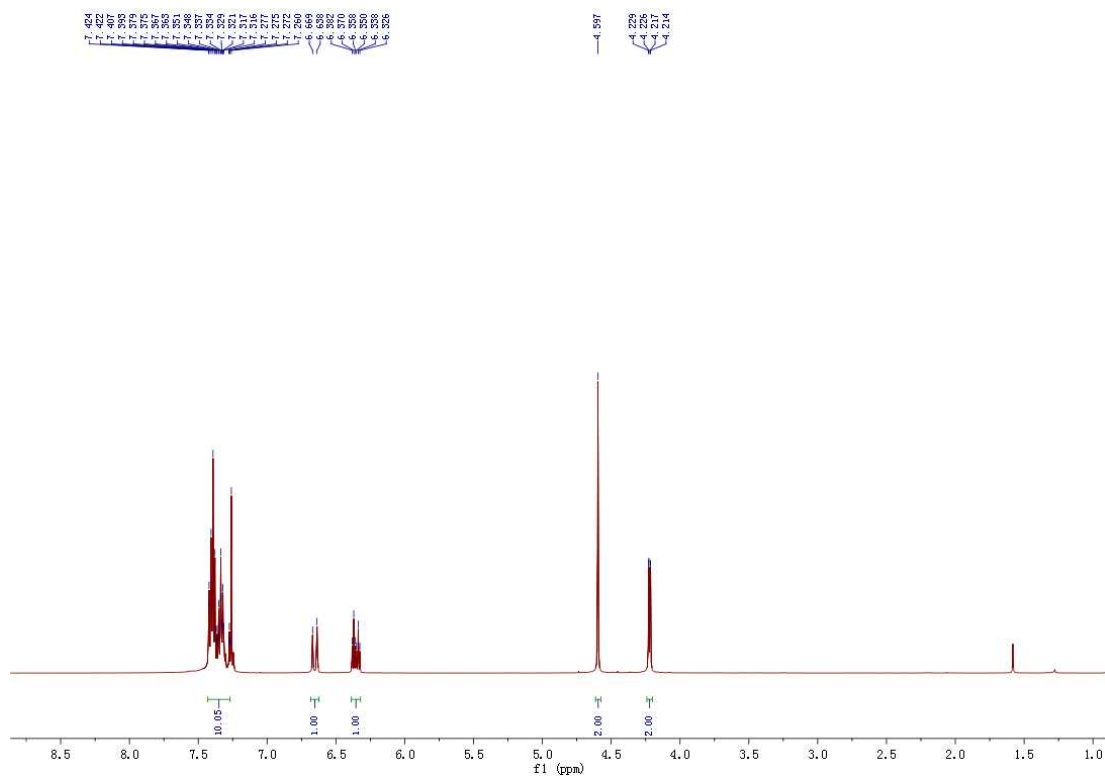

**<sup>13</sup>C NMR**

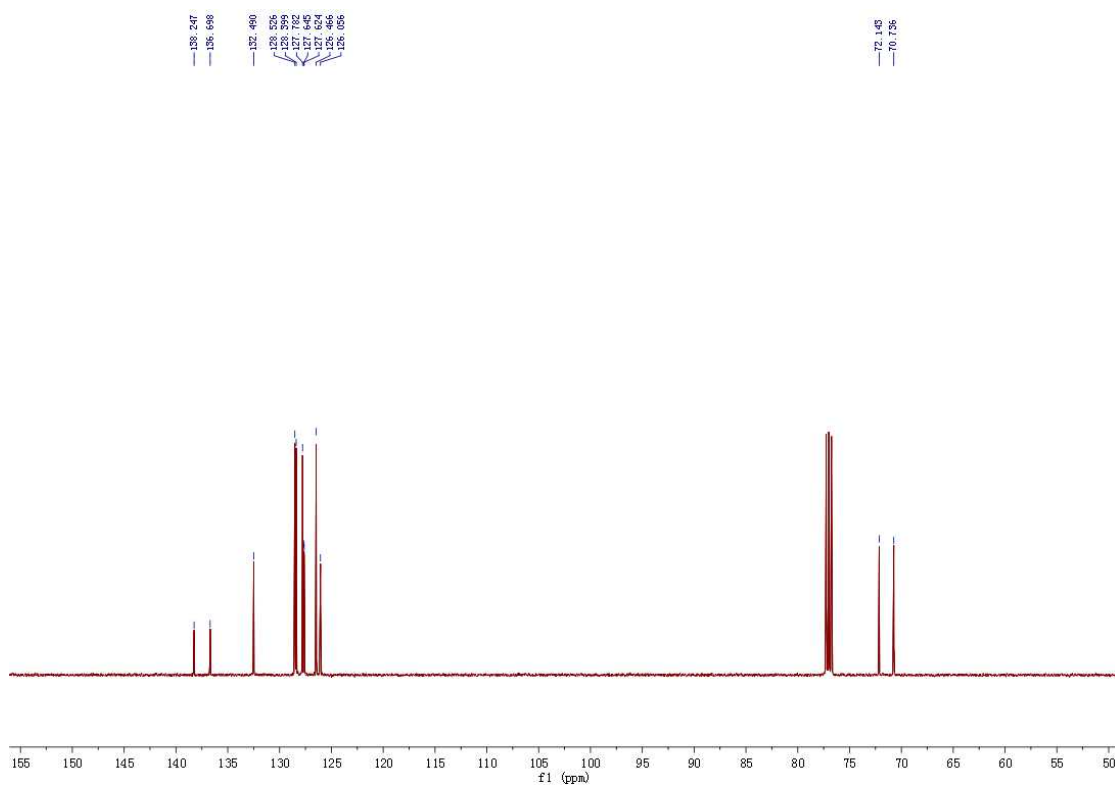

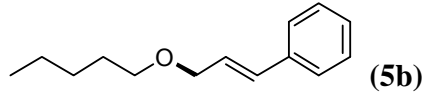

**<sup>1</sup>H NMR**

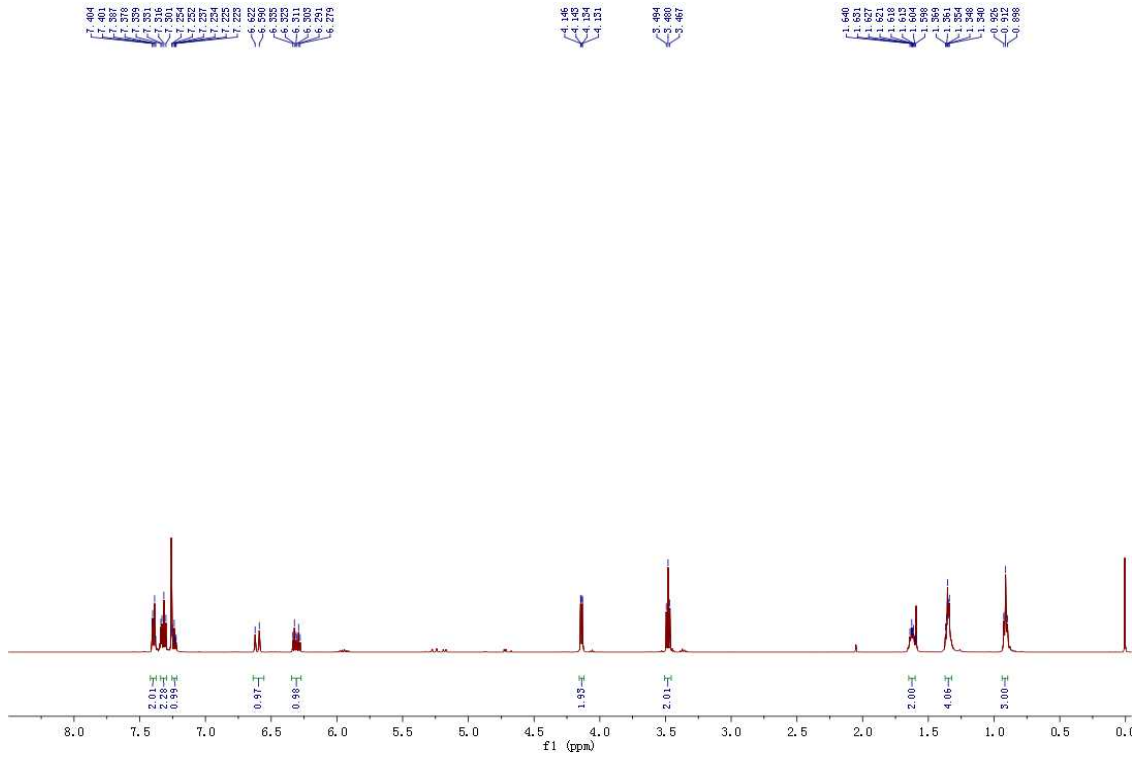

**<sup>13</sup>C NMR**

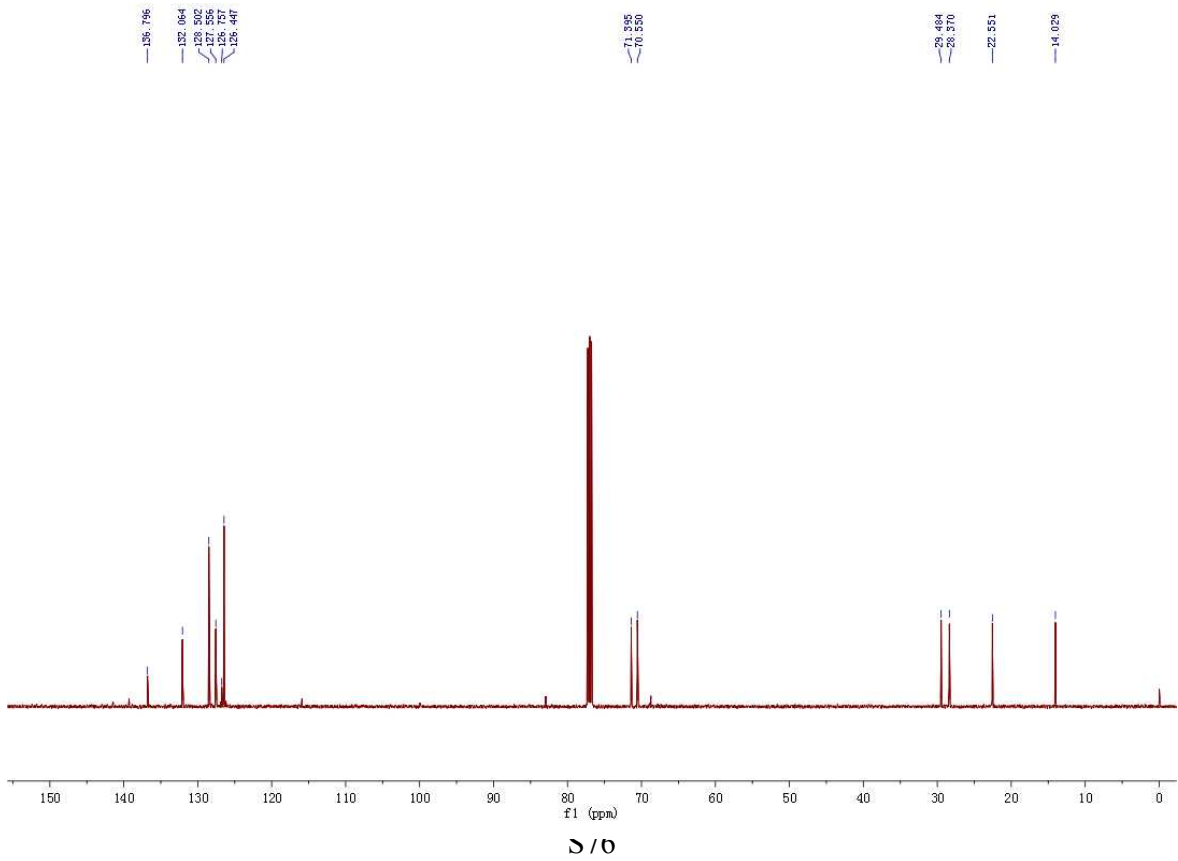

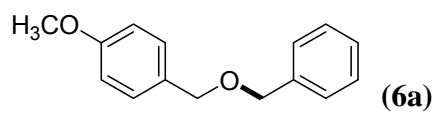

<sup>1</sup>H NMR

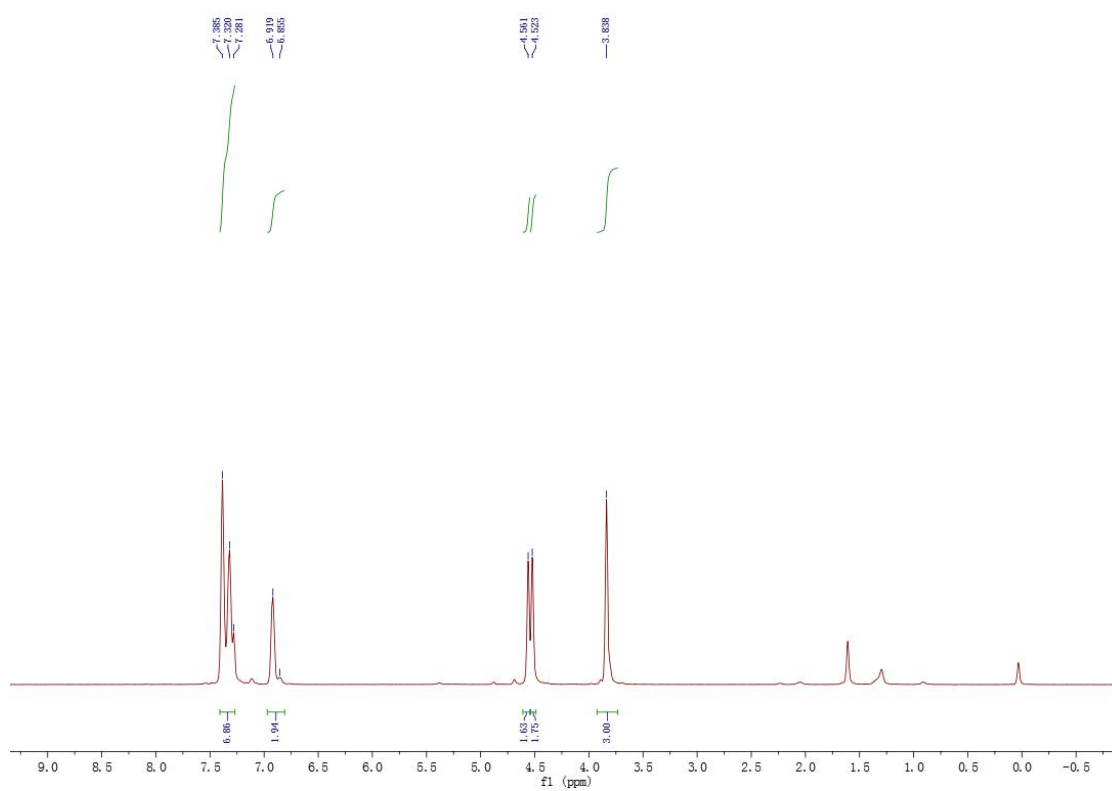

<sup>13</sup>C NMR

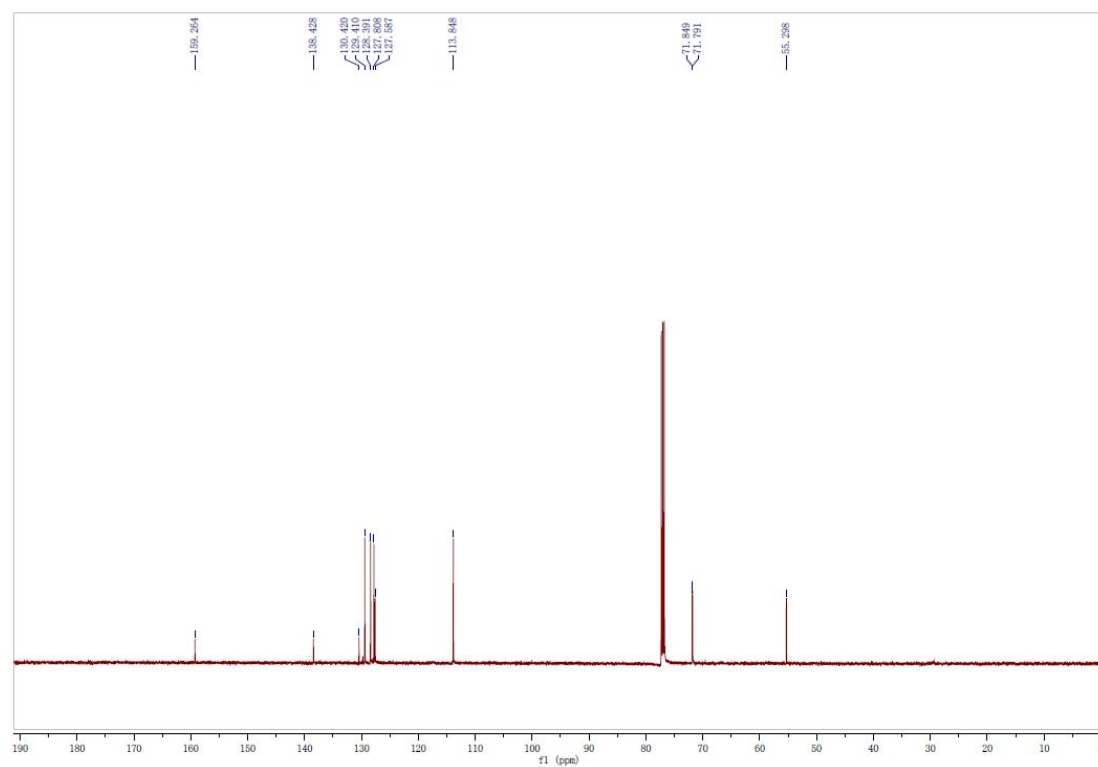

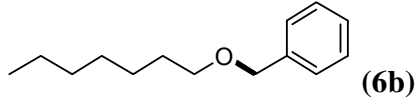

**<sup>1</sup>H NMR**

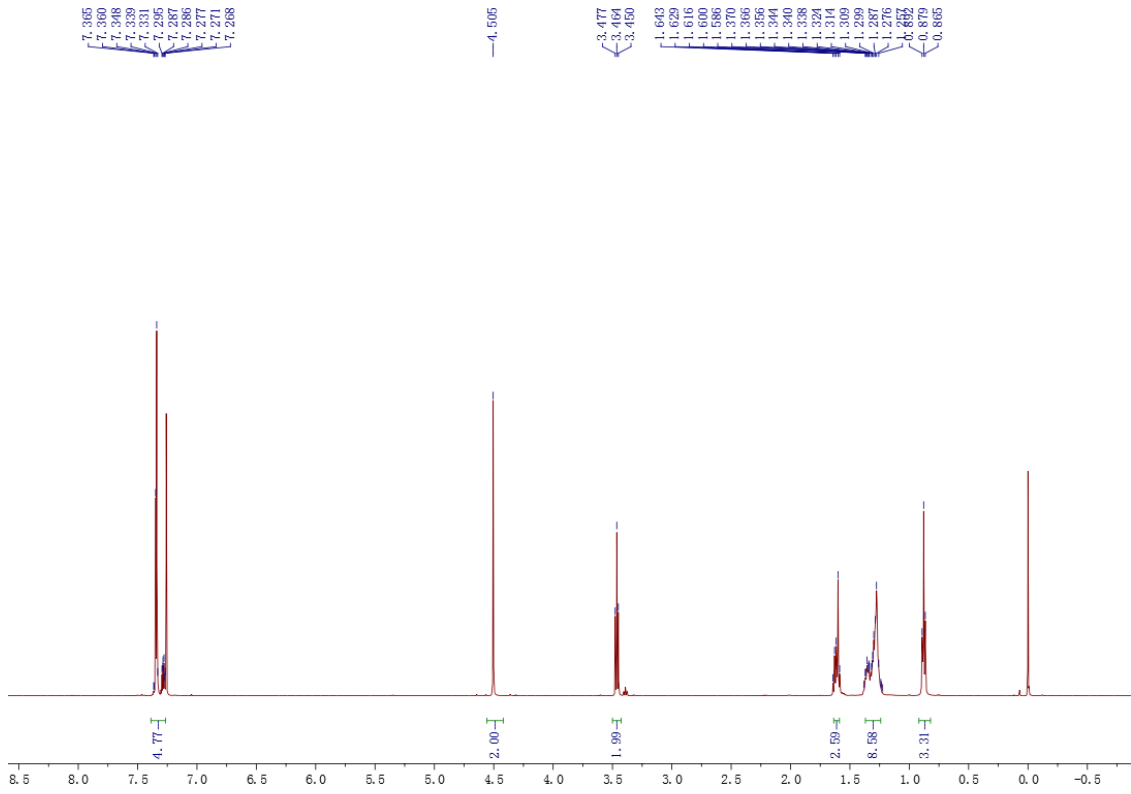

**<sup>13</sup>C NMR**

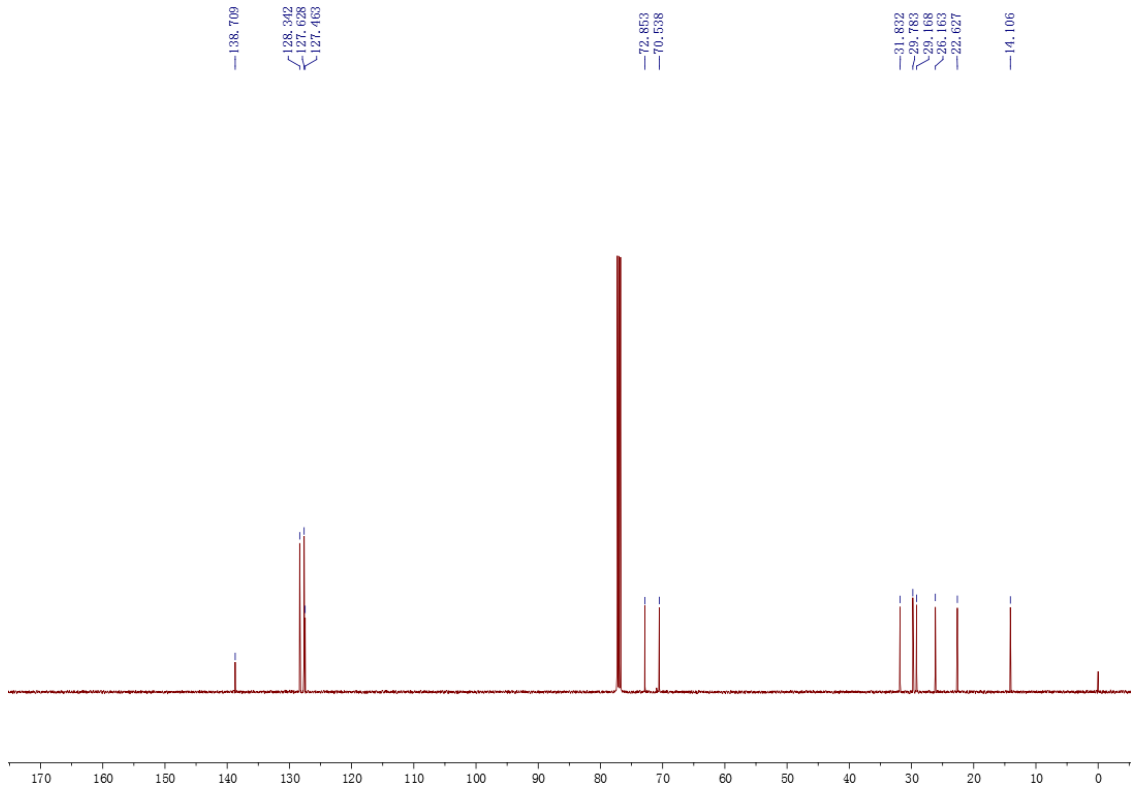

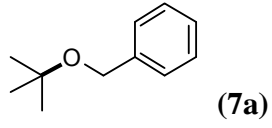

<sup>1</sup>H NMR

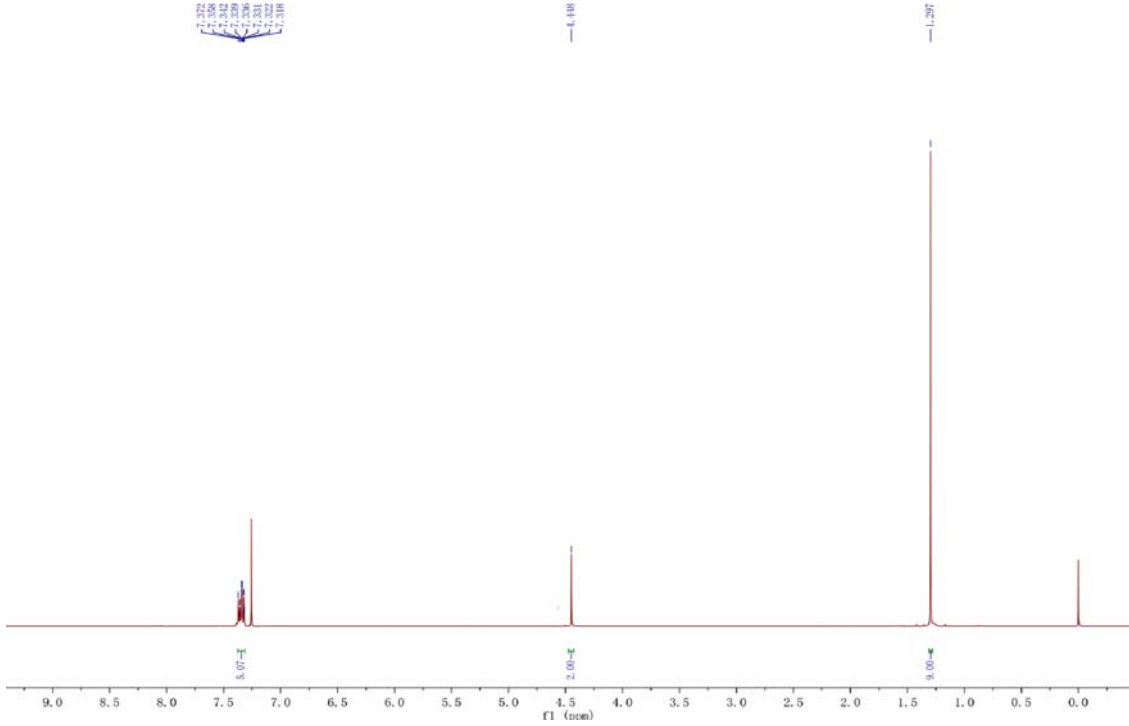

<sup>13</sup>C NMR

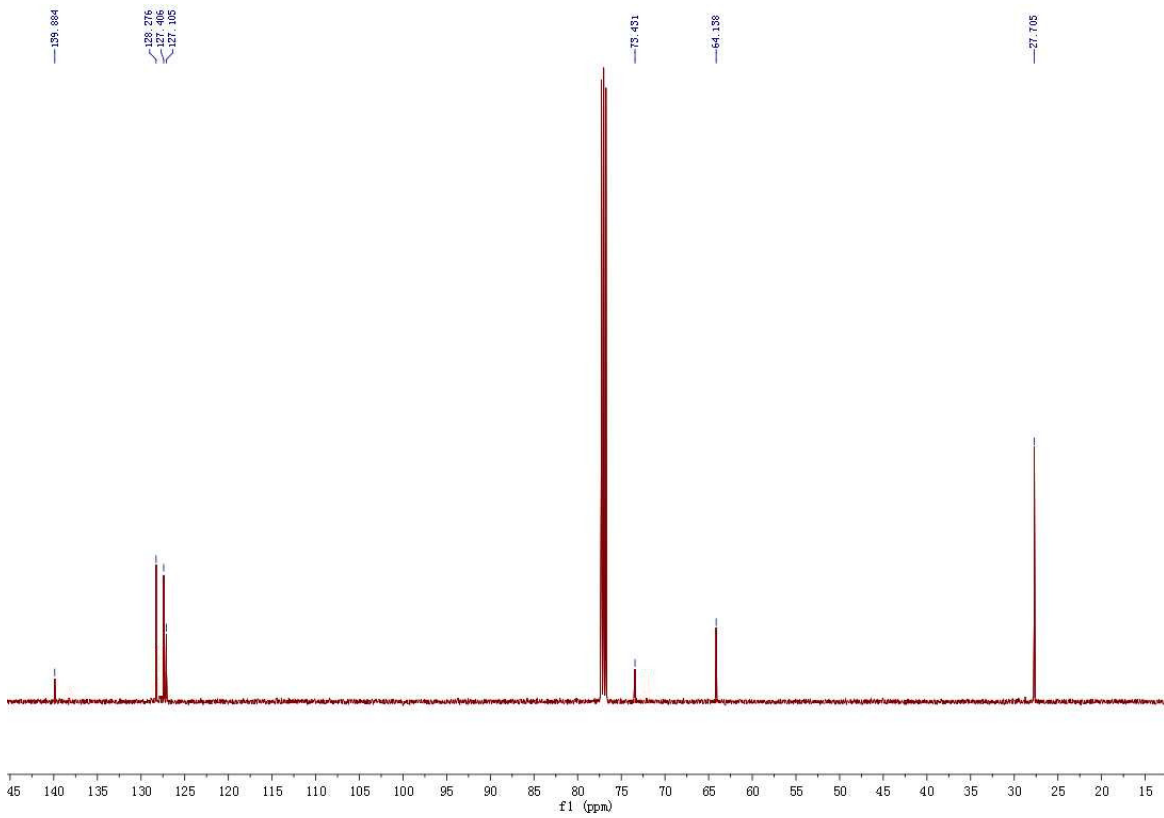

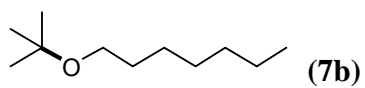

<sup>1</sup>H NMR

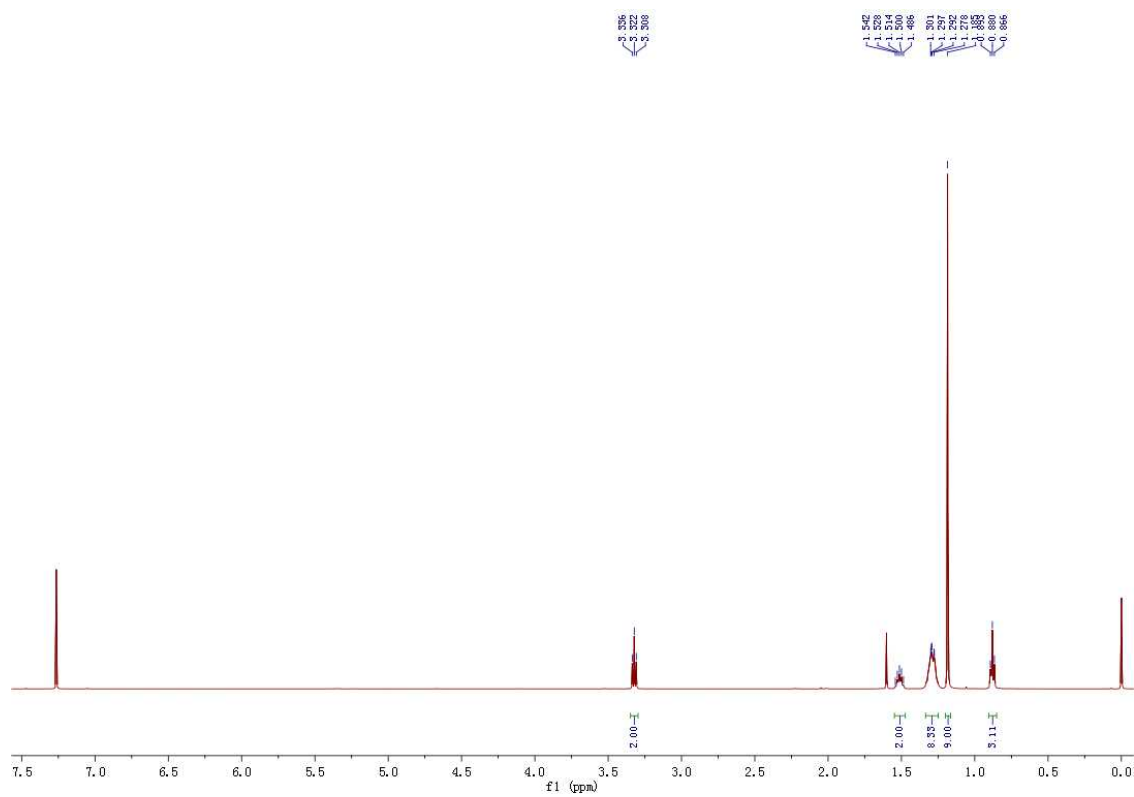

<sup>13</sup>C NMR

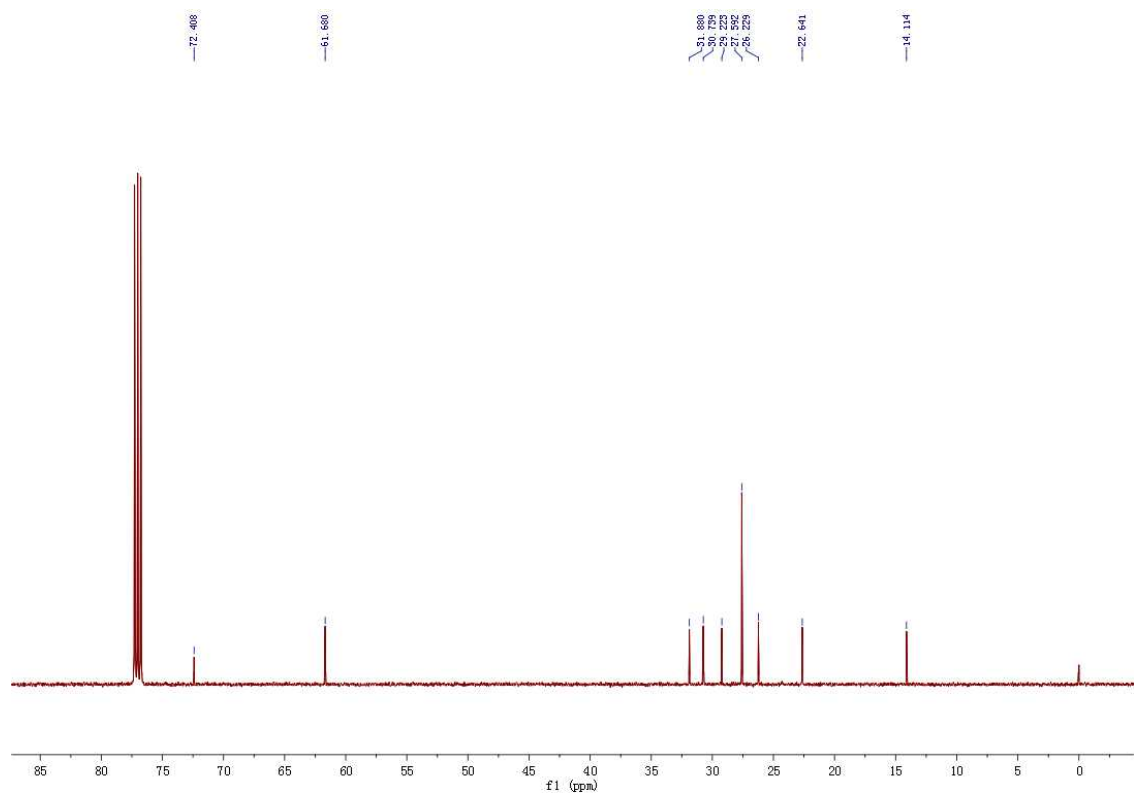

S80
